# Supplementary material
Source: PubMed Central journal article supplement (PMC2610416)
Supplement: NIHMS78037-supplement-1.pdf [file NIHMS78037-supplement-1.pdf]

2 **Supplemental Legends**

3

4 **Supplemental Fig. 1** - Replicate GeneChips cluster faithfully with each other using GO  
5 distributions. Depicted are dendrograms prepared by clustering expression profiles in terms of  
6 GO distribution as for Figs. 1 & 2. Each expression profile in this case was derived by comparing  
7 a single Affymetrix GeneChip to a baseline comprising all the replicates of the opposite  
8 differentiation state. For example, the first GeneChip from the lateral ventricle brain from  
9 Ramalho-Santos et al. (2002) was referenced to both Neural SC chips from the same study, and  
10 the first Neural SC chip was referenced to both brain chips. Note how in almost all cases  
11 expression profiles prepared from individual GeneChips cluster with their replicates, and all SC  
12 expression profiles still cluster separately from those of differentiated expression profiles. The  
13 most divergent replicates are the intestinal polyp GeneChips, each of which, according to the  
14 authors, was prepared from a different polyp; thus, these profiles may diverge due to biological  
15 differences and not due to technical problems inherent to GO distribution-based clustering. A)  
16 and B) were generated identically, because the experiments from Goodell and co-workers  
17 comprised so many replicate GeneChips, they were separated for clarity of presentation.

18

19 **Supplemental Fig. 2** – Plots of GO terms used for one-way ANOVA with Bonferroni correction  
20 on expression profiles performed in replicates. Lists of preferentially expressed genes in each cell  
21 population were generated from individual GeneChips in experiments where replicate GeneChips  
22 had been performed. Variance between levels of GO term representation in replicate gene lists  
23 were used as the basis for one-way ANOVAs comparing the variance among replicates in each  
24 cell population with the replicates and variance of all other cell populations, with no a priori  
25 designation of whether each population was SC-specific or DC-specific. Mean ( $\pm$ SD) fractional  
26 representations of each GO term within each cell population are plotted. Red: profiles presumed  
27 to be DCs; Blue: presumed SC populations. The tables under each plot show statistically

2 significant different populations as determined by Bonferroni multiple comparison post-test with  
3 cutoff for significance set as  $p < 0.05$ . Note how with the distinguishing GO terms “nucleus” (A),  
4 “integral to membrane” (B), and “RNA binding” (C), SCs tend to be similar to every other SC  
5 profile and statistically different from the differentiated populations. The non-distinguishing term  
6 “protein binding” (D) shows that most individual populations are similar to most other  
7 populations, regardless of whether they are biologically likely to be SCs or DCs. For those  
8 sporadic individual population-by-population comparisons that do show significant differences in  
9 “protein binding”, just as many differ within each category (*e.g.*, SC vs. SC) as across categories  
10 (SC vs. Differentiated). Note also that the bone marrow profile (8) behaves more like an  
11 intermediate population, perhaps because it contains a large reservoir of progenitor cells of  
12 intermediate differentiation as well as DCs.

13

14 **Supplemental Table 1. Sources of primary data for initial profiles.** Data sources for the  
15 initial dataset (used in Figs. 1 and 2) are given grouped by tissue type. Sources are indicated by  
16 investigator and citation.

17 **Supplemental Table 2. Sources of primary data for prospectively analyzed profiles.**

18 Sources described as for Supplemental Table 1. Note that the colonic dividing crypt cell profile  
19 was generated *de novo* for the current manuscript.

20 **Supplemental Table 3. Algorithm for deriving lists of genes preferentially expressed in each**  
21 **cell population.** For each cell population, the algorithm used to determine the genes  
22 preferentially expressed in that cell population is shown. Note that the list of preferentially  
23 expressed genes was the input for the GOurmet software, which subsequently re-expressed each  
24 gene list in terms of the GO terms associated with the genes. These GO term distributions were  
25 then used to represent each cell population gene expression profile in all the figures in the current  
26 manuscript. For example, the Neural SC 1 expression profile was determined by identifying the  
27 genes whose expression was significantly enriched in duplicate Neural SC GeneChips from

2 Melton and co-workers relative to duplicate brain GeneChips in the same study. In most cases,  
3 results from all replicates in a given study were averaged and, wherever possible, samples of one  
4 differentiation state were referenced to samples of the opposite differentiation state in the same  
5 study.

6 **Supplemental Table 4. GO terms significantly increased in TAs.** Those GO terms changed  
7 with  $p < 0.05$  by pairwise T-tests between TA and SC populations are depicted. Note that all but  
8 one of these also differs in independent T-tests between TA and DC populations. The list does not  
9 include: 1) GO terms changed by less than 0.7-fold on a log<sub>2</sub> scale (*i.e.* increased by only ~1.6-  
10 fold or decreased by only 0.62-fold); 2) GO terms whose fractional representation on average in  
11 the TA population was less than 1%.

12 **Supplemental Workbook. Excel Workbook showing how a single expression profile (colonic**  
13 **transit amplifying cell population) was re-expressed as a function of the fractional**  
14 **representation of its associated GO terms.** “Summary” worksheet shows: the number of genes  
15 that constitute the colon transit amplifying cell expression profile; the number of GO terms  
16 associated with those genes; the percentage of genes that had been annotated well enough to have  
17 associated GO terms; and the breakdown of the GO terms into each of the principal GO term  
18 categories. “Gene→GO” worksheet shows each gene in the colonic TA expression profile in the  
19 first column, followed by all the GO terms associated with that gene (note most genes are  
20 associated with multiple GO terms). “GO→gene” worksheet shows the GO term in the first  
21 column, followed by all the genes associated with that GO term. “Fract Rep” worksheet shows  
22 the fractional representation of each GO term within the list of genes, followed by the averages  
23 fractional representation of that GO term among all the expression profiles of the three major  
24 categories of expression profile for reference. Thus, for “nucleus”, 47% of the genes with GO  
25 terms in the colon transit amplifying profile were associated with the GO term “nucleus”,  
26 compared to 46% for TA cells on average, 35% for SC and 22% for DC.

27

A

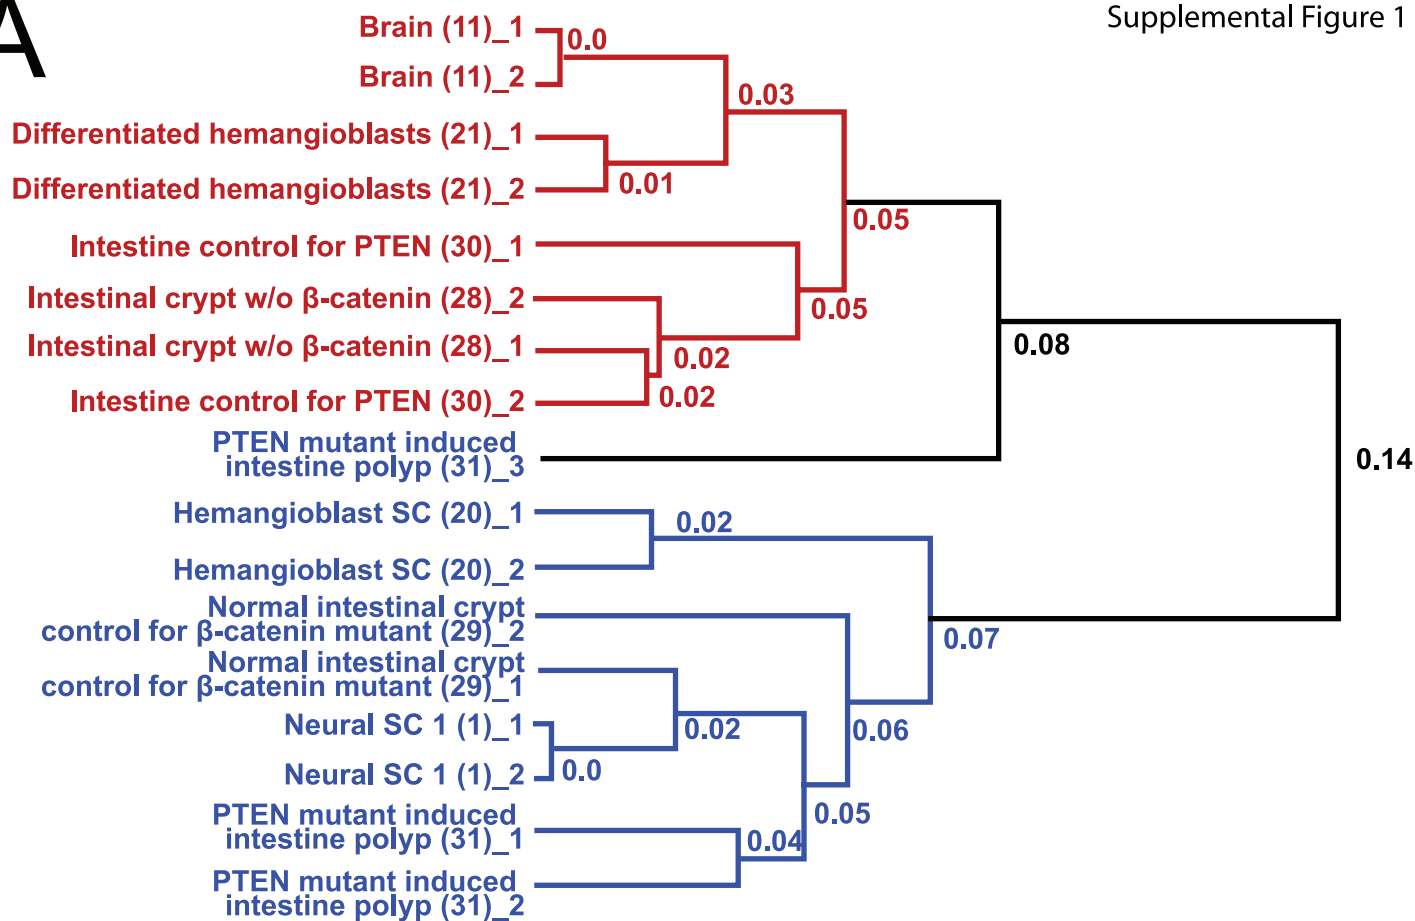

B

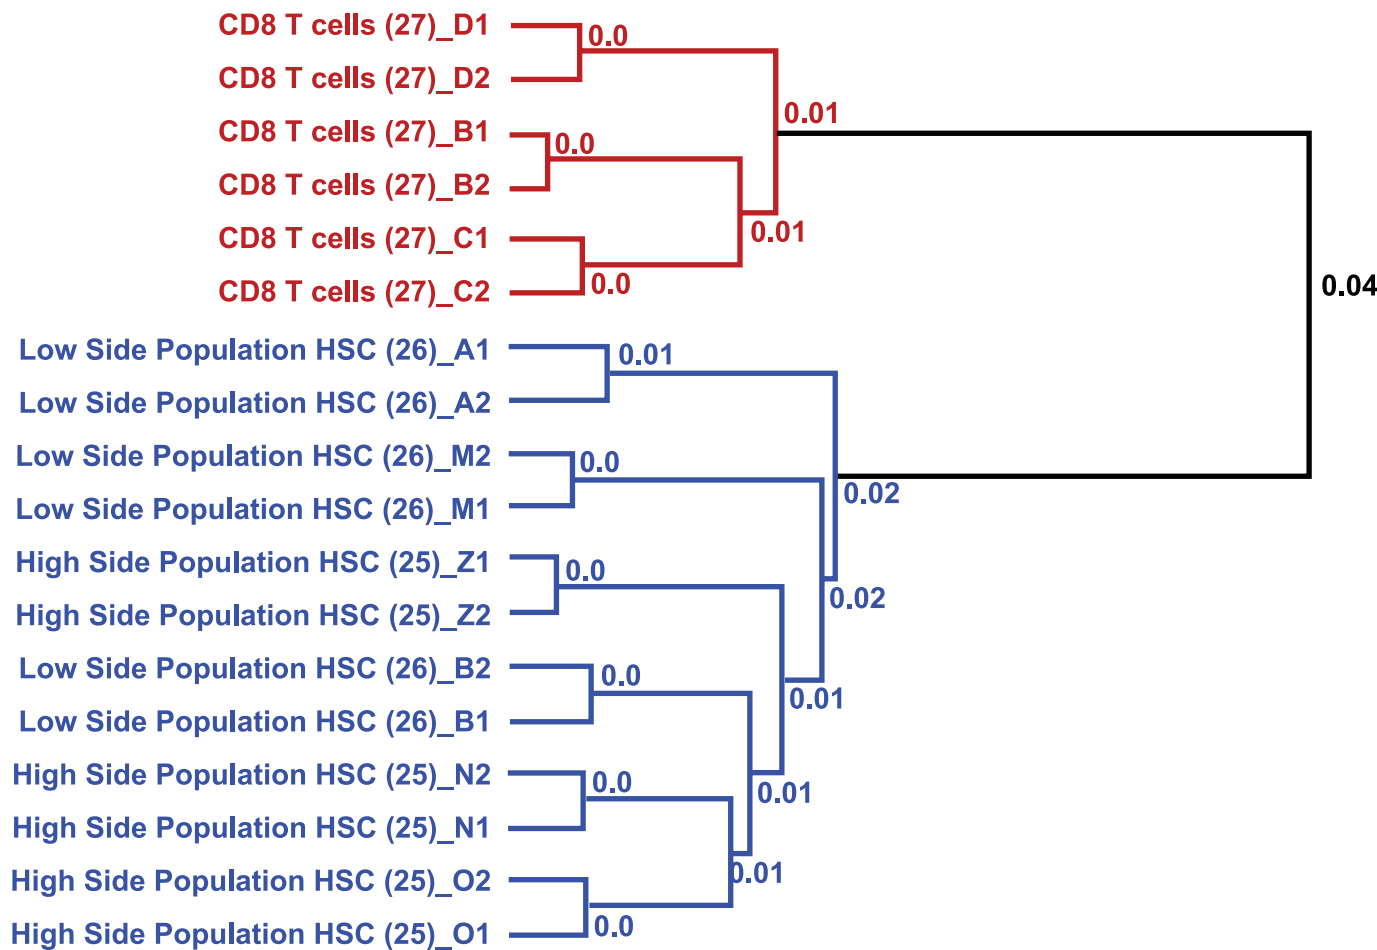

A

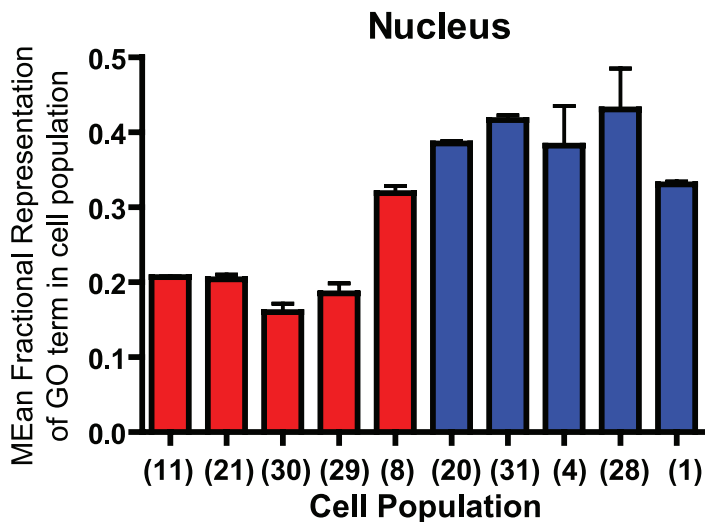

| Population | Significantly Different Populations | Similar Populations                        |
|------------|-------------------------------------|--------------------------------------------|
| (1)        | (11) (21) (29) (30)                 | (4) (20) (28) (31) (8)                     |
| (4)        | (11) (21) (29) (30)                 | (1) (20) (28) (31) (8)                     |
| (20)       | (11) (21) (29) (30)                 | (1) (4) (28) (31) (8)                      |
| (28)       | (11) (21) (29) (30)                 | (1) (4) (20) (31) (8)                      |
| (31)       | (11) (21) (29) (30)                 | (1) (4) (20) (28) (8)                      |
| (8)        |                                     | (11) (21) (29) (30) (1) (4) (20) (28) (31) |
| (11)       | (1) (20) (28) (31)                  | (8) (21) (29) (30) (4)                     |
| (21)       | (1) (4) (20) (28) (31)              | (8) (11) (29) (30)                         |
| (29)       | (1) (20) (28) (31)                  | (8) (11) (21) (30) (4)                     |
| (30)       | (1) (4) (20) (28) (31)              | (8) (11) (21) (29)                         |

B

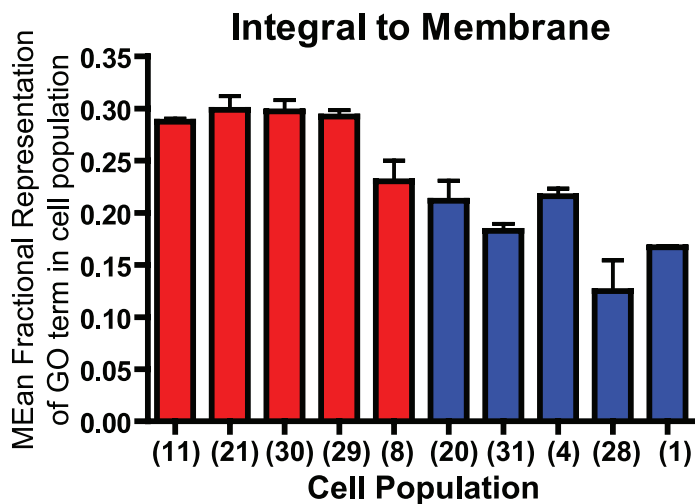

| Population | Significantly Different Populations | Similar Populations                        |
|------------|-------------------------------------|--------------------------------------------|
| (1)        | (11) (21) (29) (30)                 | (4) (20) (28) (31) (8)                     |
| (4)        |                                     | (1) (20) (28) (31) (8) (11) (21) (29) (30) |
| (20)       |                                     | (1) (4) (28) (31) (8) (11) (21) (29) (30)  |
| (28)       | (8) (11) (21) (29) (30)             | (1) (4) (20) (31)                          |
| (31)       | (11) (21) (29) (30)                 | (1) (4) (20) (28) (8)                      |
| (8)        | (28)                                | (11) (21) (29) (30) (1) (4) (20) (31)      |
| (11)       | (1) (28) (31)                       | (8) (21) (29) (30) (4) (20)                |
| (21)       | (1) (28) (31)                       | (8) (11) (29) (30) (4) (20)                |
| (29)       | (1) (28) (31)                       | (8) (11) (21) (30) (4) (20)                |
| (30)       | (1) (28) (31)                       | (8) (11) (21) (29) (4) (20)                |

C

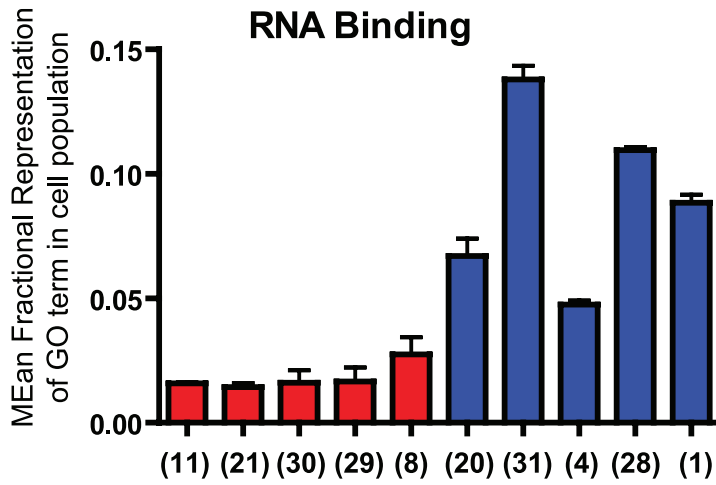

| Population | Significantly Different Populations   | Similar Populations     |
|------------|---------------------------------------|-------------------------|
| (1)        | (8) (11) (21) (29) (30) (4) (31)      | (20) (28)               |
| (4)        | (8) (11) (21) (29) (30) (1) (28) (31) | (20)                    |
| (20)       | (8) (11) (21) (29) (30) (28) (31)     | (1) (4)                 |
| (28)       | (8) (11) (21) (29) (30) (4) (20)      | (1) (31)                |
| (31)       | (8) (11) (21) (29) (30) (1) (4) (20)  | (28) (31)               |
| (8)        | (1) (20) (28) (31)                    | (11) (21) (29) (30) (4) |
| (11)       | (1) (4) (20) (28) (31)                | (8) (21) (29) (30)      |
| (21)       | (1) (4) (20) (28) (31)                | (8) (11) (29) (30)      |
| (29)       | (1) (4) (20) (28) (31)                | (8) (11) (21) (30)      |
| (30)       | (1) (4) (20) (28) (31)                | (8) (11) (21) (29)      |

D

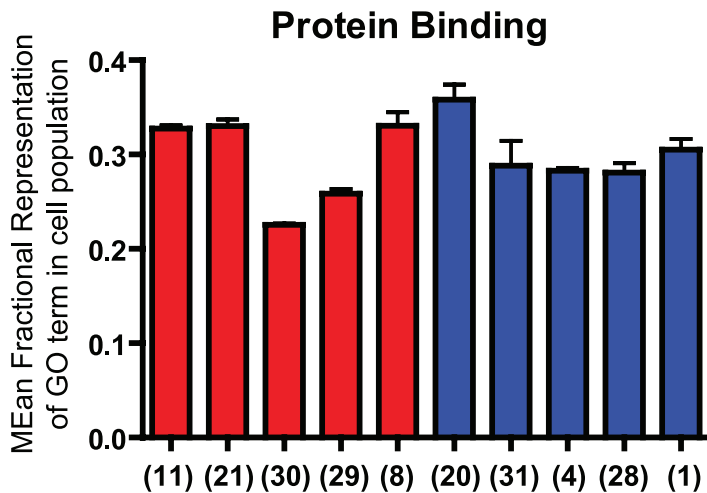

| Population | Significantly Different Populations | Similar Populations                        |
|------------|-------------------------------------|--------------------------------------------|
| (1)        |                                     |                                            |
| (4)        |                                     | (1) (20) (28) (31) (8) (11) (21) (29) (30) |
| (20)       | (29) (30)                           | (1) (4) (28) (31) (8) (11) (21)            |
| (28)       |                                     | (1) (4) (20) (31) (8) (11) (21) (29) (30)  |
| (31)       |                                     | (1) (4) (20) (28) (8) (11) (21) (29) (30)  |
| (8)        |                                     | (11) (21) (29) (30) (1) (4) (20) (28) (31) |
| (11)       | (30)                                | (8) (21) (29) (1) (4) (20) (28) (31)       |
| (21)       | (30)                                | (8) (11) (29) (1) (4) (20) (28) (31)       |
| (29)       | (20)                                | (8) (11) (21) (30) (1) (4) (28) (31)       |
| (30)       | (1) (20) (8) (11) (21)              | (29) (4) (28) (31)                         |

## Supplemental Table 1

| ID   | Sample                 | Data Type           | Source                                                                                                                                                                                                                                          |                        |
|------|------------------------|---------------------|-------------------------------------------------------------------------------------------------------------------------------------------------------------------------------------------------------------------------------------------------|------------------------|
| (1)  | Neural SC 1            | Affymetrix mgU74    | Douglas A. Melton (Ramalho-Santos et al., 2002)<br>-- <a href="http://mcb.harvard.edu/melton/index.html">http://mcb.harvard.edu/melton/index.html</a><br>-- <a href="http://www.ebi.ac.uk/arrayexpress/">http://www.ebi.ac.uk/arrayexpress/</a> | Accession: E-MEXP-1158 |
| (2)  | Neural SC 2            | Affymetrix mgU74    | Ihor R. Lemischka (Ivanova et al., 2002)<br>-- <a href="http://www.cbil.upenn.edu/RAD3/php/displayStudy.php?study_id=270">http://www.cbil.upenn.edu/RAD3/php/displayStudy.php?study_id=270</a>                                                  |                        |
| (3)  | Neural SC 3            | Affymetrix mgU74    | Fred H. Gage (D'Amour and Gage, 2003)<br>--available upon request of F.H. Gage                                                                                                                                                                  |                        |
| (4)  | Hematopoietic SC 1     | Affymetrix mgU74    | Douglas A. Melton (Ramalho-Santos et al., 2002)<br>-- <a href="http://mcb.harvard.edu/melton/index.html">http://mcb.harvard.edu/melton/index.html</a><br>-- <a href="http://www.ebi.ac.uk/arrayexpress/">http://www.ebi.ac.uk/arrayexpress/</a> | Accession: E-MEXP-1158 |
| (5)  | Hematopoietic SC 2     | Affymetrix mgU74    | Ihor R. Lemischka (Ivanova et al., 2002)<br>-- <a href="http://www.cbil.upenn.edu/RAD3/php/displayStudy.php?study_id=270">http://www.cbil.upenn.edu/RAD3/php/displayStudy.php?study_id=270</a>                                                  |                        |
| (6)  | Hematopoietic SC (EST) | subtracted ESTs     | Ihor R. Lemischka<br>--Unigene Library 11946                                                                                                                                                                                                    |                        |
| (7)  | Skin SC                | Affymetrix mgU74    | Elaine Fuchs (Tumbar et al., 2004)<br>-- <a href="http://www.rockefeller.edu/labheads/fuchs/database.php">http://www.rockefeller.edu/labheads/fuchs/database.php</a>                                                                            |                        |
| (8)  | Bone Marrow 1          | Affymetrix mgU74    | Douglas A. Melton (Ramalho-Santos et al., 2002)<br>-- <a href="http://mcb.harvard.edu/melton/index.html">http://mcb.harvard.edu/melton/index.html</a><br>-- <a href="http://www.ebi.ac.uk/arrayexpress/">http://www.ebi.ac.uk/arrayexpress/</a> | Accession: E-MEXP-1158 |
| (9)  | Bone Marrow 2          | Affymetrix mgU74    | Ihor R. Lemischka (Ivanova et al., 2002)<br>-- <a href="http://www.cbil.upenn.edu/RAD3/php/displayStudy.php?study_id=270">http://www.cbil.upenn.edu/RAD3/php/displayStudy.php?study_id=270</a>                                                  |                        |
| (10) | Small Intestine        | Affymetrix mu11K    | Lora V. Hooper (Hooper et al., 2001)<br>--available upon request of L.V. Hooper                                                                                                                                                                 |                        |
| (11) | Brain                  | Affymetrix mgU74    | Douglas A. Melton (Ramalho-Santos et al., 2002)<br>-- <a href="http://mcb.harvard.edu/melton/index.html">http://mcb.harvard.edu/melton/index.html</a><br>-- <a href="http://www.ebi.ac.uk/arrayexpress/">http://www.ebi.ac.uk/arrayexpress/</a> | Accession: E-MEXP-1158 |
| (12) | Stomach Chief Cells    | Affymetrix MOE430v2 | Jason C. Mills (Ramsey et al., 2007)<br>--GEO: GSM113347                                                                                                                                                                                        |                        |
| (13) | Stomach Surface Cells  | Affymetrix MOE430v2 | Jason C. Mills (Ramsey et al., 2007)<br>--GEO: GSM113348                                                                                                                                                                                        |                        |
| (14) | Small Intestine SC     | Affymetrix mu11K    | Thaddeus S. Stappenbeck (Stappenbeck et al., 2003)<br>-- <a href="http://gutsc.wustl.edu/supplement">http://gutsc.wustl.edu/supplement</a>                                                                                                      |                        |
| (15) | Mesenchymal SC (EST)   | subtracted ESTs     | Akihiro Umezawa (Sharov et al., 2003)<br>--Unigene Library 10031                                                                                                                                                                                |                        |
| (16) | Gastric SC             | Affymetrix mu11K    | Jason C. Mills (Mills et al., 2002)<br>-- <a href="http://gutsc.wustl.edu/supplement">http://gutsc.wustl.edu/supplement</a>                                                                                                                     |                        |
| (17) | Gastric SC (EST)       | subtracted ESTs     | Jason C. Mills<br>--Unigene Library 14504                                                                                                                                                                                                       |                        |
| (18) | Retina                 | Affymetrix mgU74    | N. O. Fortunel (Fortunel et al., 2003)<br>-- <a href="http://giscompute.gis.a-star.edu.sg/suppdata_stemness/">http://giscompute.gis.a-star.edu.sg/suppdata_stemness/</a>                                                                        |                        |
| (19) | Skin                   | Affymetrix mgU74    | D. W. Mazingo (Feezor et al., 2004)<br>--GEO: GSM7478,GSM7479,GSM7480; Raw chip data available upon request of R.J. Feezor                                                                                                                      |                        |

## Supplemental Table 2

| <b>ID</b> | <b>Sample</b>                 | <b>Data Type</b>     | <b>Source</b>                                                                                                                                                            |
|-----------|-------------------------------|----------------------|--------------------------------------------------------------------------------------------------------------------------------------------------------------------------|
| (20)      | Hemangioblast                 | Affymetrix mgU74     | Kyunghee Choi (Lugus et al., 2007)<br>--GEO:GSM157405-157406                                                                                                             |
| (21)      | Differentiated hemangioblasts | Affymetrix mgU74     | Kyunghee Choi (Lugus et al., 2007)<br>--GEO:GSM157407-157408                                                                                                             |
| (22)      | Differentiated fibroblasts    | Affymetrix hgU133v2  | George Q. Daly (Park et al., 2007)<br>--GEO:GSM248201-248202, GSM248204                                                                                                  |
| (23)      | Induced pluripotent SCs       | Affymetrix hgU133v2  | George Q. Daly (Park et al., 2007)<br>--GEO:GSM248205-248208                                                                                                             |
| (24)      | Embryonic SC                  | Affymetrix hgU133v2  | George Q. Daley (Park et al., 2007)<br>--GEO:GSM248200                                                                                                                   |
| (25)      | High SP hematopoietic SCs     | Affymetrix mgU74     | Margaret A. Goodell (Ramos et al., 2006)<br>--GEO:GSM48321-48326                                                                                                         |
| (26)      | Low SP hematopoietic SCs      | Affymetrix mgU74     | Margaret A. Goodell (Ramos et al., 2006)<br>--GEO:GSM48315-48320                                                                                                         |
| (27)      | CD8 T cells                   | Affymetrix mgU74     | Margaret A. Goodell (Ramos et al., 2006)<br>--GEO:GSM48327-48332                                                                                                         |
| (28)      | Catenin crypt mutant          | Affymetrix MOE430v2  | Joerg Huelsken (Fevr et al., 2007)<br>--GEO:GSM219116-219117                                                                                                             |
| (29)      | Catenin crypt control         | Affymetrix MOE430v2  | Joerg Huelsken (Fevr et al., 2007)<br>--GEO:GSM219114-219115                                                                                                             |
| (30)      | PTEN control                  | Affymetrix MOE430v2  | Linheng Li (He et al., 2007)<br>--GEO:GSM140792, GSM140816                                                                                                               |
| (31)      | PTEN mutant (polyp)           | Affymetrix MOE430v2  | Linheng Li (He et al., 2007)<br>--GEO:GSM140813, GSM140817-140818                                                                                                        |
| (32)      | Retinal epithelial progenitor | Affymetrix mgU74     | N. O. Fortunel (Fortunel et al., 2003)<br>-- <a href="http://giscompute.gis.a-star.edu.sg/suppdata_stemness/">http://giscompute.gis.a-star.edu.sg/suppdata_stemness/</a> |
| (33)      | Human colonic crypt cells     | cDNA microarray      | Xin Chen (Kosinski et al., 2007)<br>--GEO:GSE6894                                                                                                                        |
| (34)      | Dividing colonic crypt cells  | Affymetrix MOE430    | Thaddeus Stappenbeck (current manuscript)<br>--GEO:Pending                                                                                                               |
|           | Myoblast series for Fig. 2C   | Affymetrix hgU133A,B | Michael A. Rudnicki (unpublished)<br>--GEO:GSM86678-GSM86737<br>Stembase experiment ID E210 (Perez-Iratxeta et al., 2005)                                                |



|                           |          |
|---------------------------|----------|
| Genes                     | 455      |
| Go Terms                  | 1129     |
| % of Genes with Go Terms: | 0.905495 |
| cellular component %      | 0.159433 |
| molecular function %      | 0.318866 |
| biological process %      | 0.521701 |

---

|               |                                    |                                           |
|---------------|------------------------------------|-------------------------------------------|
| 1190002H23Rik | cytoplasm                          | cell cycle                                |
| 1200016G03Rik |                                    |                                           |
| 1500010J02Rik |                                    |                                           |
| 1600029D21Rik |                                    |                                           |
| 1700022L09Rik | nucleus                            |                                           |
| 1700097N02Rik |                                    |                                           |
| 1810003N24Rik | nucleic acid binding               | RNA binding                               |
| 2010012C16Rik | sex determination                  | nucleus                                   |
| 2210407C18Rik | extracellular space                |                                           |
| 2210411K19Rik |                                    |                                           |
| 2310008M10Rik |                                    |                                           |
| 2310035K24Rik |                                    |                                           |
| 2600005C20Rik |                                    |                                           |
| 2610039C10Rik |                                    |                                           |
| 2610528M18Rik |                                    |                                           |
| 2810026P18Rik |                                    |                                           |
| 2810028N01Rik | exonuclease activity               | RNA binding                               |
| 2810417H13Rik | nucleus                            | mitochondrion                             |
| 2810421I24Rik |                                    |                                           |
| 2810430M08Rik |                                    |                                           |
| 3110048L19Rik |                                    |                                           |
| 5730507H05Rik | biological process unknown         | cellular component unknown                |
| 6330416L07Rik | zinc ion binding                   | nucleus                                   |
| 6330527O06Rik | integral to membrane               | membrane                                  |
| 9030408N13Rik |                                    |                                           |
| 9830147J24Rik |                                    |                                           |
| A030007L17Rik |                                    |                                           |
| AI132487      | transport                          | integral to membrane                      |
| AU020206      |                                    |                                           |
| AU021838      | magnesium ion binding              | ribose phosphate diphosphokinase activity |
| Aaas          | cellular component unknown         | biological process unknown                |
| Abce1         | nucleoside-triphosphatase activity | ATPase activity                           |
| Acsf5         | lipid metabolism                   | peroxisome                                |
| Acsm2         | cellular component unknown         | biological process unknown                |
| Acta2         | biological process unknown         | protein binding                           |
| Actl6a        | nucleus                            | transcription                             |

|               |                                               |                                            |
|---------------|-----------------------------------------------|--------------------------------------------|
| Ada           | methylated-DNA-[protein]-cysteine S-methy     | regulation of transcription, DNA-dependent |
| Agr2          | extracellular space                           |                                            |
| Aldh18a1      | cytoplasm                                     | catalytic activity                         |
| Amd1          | purine nucleotide metabolism                  | cytoplasm                                  |
| Amdhd1        | imidazolonepropionase activity                |                                            |
| Amot          | ruffle                                        | regulation of cell migration               |
| Anapc1        | mitosis                                       | nucleus                                    |
| Anp32e        | phosphatase inhibitor activity                | biological process unknown                 |
| Ap3m1         | transport                                     | protein transport                          |
| Apex1         | protein binding                               | cell redox homeostasis                     |
| Api5          | transport                                     | anti-apoptosis                             |
| Apobec3       | hydrolase activity, acting on carbon-nitroger | zinc ion binding                           |
| Aqp1          | transport                                     | integral to membrane                       |
| Arfgap1       | transport                                     | zinc ion binding                           |
| Asf1b         | chromatin                                     | nucleosome assembly                        |
| Asns          | soluble fraction                              | glutamine metabolism                       |
| Aspm          | calmodulin binding                            | biological process unknown                 |
| Atp4a         | cation transport                              | integral to membrane                       |
| Atp6ap2       | hydrogen ion transporter activity             | hydrolase activity                         |
| Atrn          | development                                   | sugar binding                              |
| Aurka         | protein-tyrosine kinase activity              | cell cycle                                 |
| Aurkb         | protein-tyrosine kinase activity              | protein binding                            |
| B230120H23Rik | protein-tyrosine kinase activity              | nucleus                                    |
| BC023814      | transferase activity                          | methyltransferase activity                 |
| BC027231      |                                               |                                            |
| BC027344      | zinc ion binding                              | nucleus                                    |
| BC053440      |                                               |                                            |
| Bcl11a        | cytoplasm                                     | transcription corepressor activity         |
| Bclaf1        | nucleus                                       | protein binding                            |
| Birc5         | protein binding                               | nucleus                                    |
| Blmh          | nucleus                                       | proteolysis                                |
| Boc           | primary spermatocyte growth                   | protein binding                            |
| Brca2         | DNA recombination                             | nucleus                                    |
| Brrn1         | cell division                                 | mitosis                                    |
| Bub1b         | nucleus                                       | kinetochore                                |
| Bxdc1         | cellular component unknown                    | biological process unknown                 |
| Bysl          | cellular component unknown                    | molecular function unknown                 |

|           |                                              |                                                 |
|-----------|----------------------------------------------|-------------------------------------------------|
| Bzw1      | transcription regulator activity             | G1/S-specific transcription in mitotic cell cyc |
| C1qbp     | mitochondrial matrix                         | complement component C1q binding                |
| C79407    | nucleus                                      |                                                 |
| C80913    | protein folding                              | prefoldin complex                               |
| Car12     | integral to membrane                         | zinc ion binding                                |
| Car8      | cytoplasm                                    | zinc ion binding                                |
| Cbx5      | nucleus                                      | protein binding                                 |
| Ccdc5     | mitosis                                      | biological process unknown                      |
| Ccdc80    |                                              |                                                 |
| Ccl9      | calcium ion homeostasis                      | signal transduction                             |
| Ccna2     | mitosis                                      | cytoplasm                                       |
| Ccnb1     | oocyte maturation                            | nucleus                                         |
| Ccnb1-rs1 | mitosis                                      | nucleus                                         |
| Ccnb2     | mitosis                                      | cell cycle                                      |
| Ccnd1     | protein binding                              | nucleus                                         |
| Ccne2     | cell division                                | regulation of progression through cell cycle    |
| Cct3      | protein binding                              | nucleus                                         |
| Cd24a     | synaptic vesicle endocytosis                 | neuromuscular synaptic transmission             |
| Cd44      | protein binding                              | integral to membrane                            |
| Cdc25b    | protein tyrosine phosphatase activity        | mitosis                                         |
| Cdc2a     | protein-tyrosine kinase activity             | protein binding                                 |
| Cdc6      | nucleoside-triphosphatase activity           | protein binding                                 |
| Cdc7      | spindle pole body                            | protein binding                                 |
| Cdca5     | cell division                                | mitosis                                         |
| Cdk2ap1   | cell cycle                                   | negative regulation of progression through c    |
| Cdk4      | positive regulation of progression through c | protein binding                                 |
| Cdk5rap2  | biological process unknown                   | regulation of neuron differentiation            |
| Cdkn2c    | cell cycle                                   | cyclin-dependent protein kinase inhibitor act   |
| Cdo1      | cytosol                                      | taurine metabolism                              |
| Cdt1      | regulation of DNA replication initiation     | pre-replicative complex                         |
| Cebpz     | transcription                                | nucleus                                         |
| Cenpf     | spindle pole                                 | regulation of striated muscle development       |
| Cep55     | cell division                                | mitosis                                         |
| Cep70     | binding                                      |                                                 |
| Chac1     |                                              |                                                 |
| Chek1     | protein-tyrosine kinase activity             | DNA damage checkpoint                           |
| Chek2     | protein-tyrosine kinase activity             | protein binding                                 |

|             |                                      |                                             |
|-------------|--------------------------------------|---------------------------------------------|
| Ckap4       | biological process unknown           | cell surface                                |
| Cks1b       | cell division                        | cell cycle                                  |
| Cldn2       | extracellular space                  | integral to membrane                        |
| Clns1a      | auxiliary transport protein activity | transport                                   |
| Cnn1        | calmodulin binding                   | actomyosin structure organization and bioge |
| Cnn3        | calmodulin binding                   | actomyosin structure organization and bioge |
| Cnot6       | transcription                        | nucleus                                     |
| Cpsf2       | biological process unknown           | mRNA cleavage and polyadenylation specif    |
| Cstf2       | nucleus                              | nucleic acid binding                        |
| Ctnnal1     | Rho protein signal transduction      | cytosol                                     |
| Ctps        | ligase activity                      | catalytic activity                          |
| Cxcl10      | protein secretion                    | chemotaxis                                  |
| Cxcl11      | cytokine activity                    | inflammatory response                       |
| Cxcl9       | cytokine activity                    | inflammatory response                       |
| D17H6S56E-5 | viral envelope                       |                                             |
| Dbf4        | nucleus                              | zinc ion binding                            |
| Ddx39       | protein binding                      | nucleus                                     |
| Dek         | nucleus                              | SRP-dependent cotranslational protein targ  |
| Diap2       | development                          | actin filament polymerization               |
| Dnajc10     | protein folding                      | unfolded protein binding                    |
| Dnajc2      | nucleus                              | protein binding                             |
| Dnajc9      | protein folding                      | heat shock protein binding                  |
| Dnmt1       | transcription factor binding         | zinc ion binding                            |
| Dynlt1      | Golgi apparatus                      | axonemal dynein complex                     |
| E2f8        | transcription                        | cell cycle                                  |
| Ect2        | cytoplasm                            | protein binding                             |
| Eftud2      | protein biosynthesis                 | nucleus                                     |
| Eif1a       | protein biosynthesis                 | transport                                   |
| Eif4e2      | protein biosynthesis                 | regulation of protein biosynthesis          |
| Eif4ebp2    | regulation of protein biosynthesis   | eukaryotic initiation factor 4E binding     |
| Eif4g1      | protein biosynthesis                 | regulation of protein biosynthesis          |
| Eif5a       | protein biosynthesis                 | cytoplasm                                   |
| Elovl5      | integral to membrane                 | fatty acid elongase activity                |
| Entpd4      | integral to membrane                 | hydrolase activity                          |
| Epb4.115    | cytoskeleton                         | axial mesoderm development                  |
| Ephb2       | protein-tyrosine kinase activity     | integral to membrane                        |
| Ephb3       | protein-tyrosine kinase activity     | integral to membrane                        |

|               |                                              |                                               |
|---------------|----------------------------------------------|-----------------------------------------------|
| Ercc6l        | helicase activity                            |                                               |
| F730047E07Rik |                                              |                                               |
| Fads1         | fatty acid desaturation                      | iron ion binding                              |
| Fancl         | ubiquitin-protein ligase activity            | regulation of cell proliferation              |
| Fancm         | DNA metabolism                               | nucleus                                       |
| Fen1          | protein binding                              | double-stranded DNA specific exodeoxyribo     |
| Ffar2         | signal transduction                          | integral to membrane                          |
| Fign1         | nucleotide binding                           | membrane                                      |
| Fkbp3         | nucleus                                      | protein folding                               |
| Fzd1          | development                                  | integral to membrane                          |
| Fzd7          | development                                  | integral to membrane                          |
| Galk1         | carbohydrate metabolism                      | galactokinase activity                        |
| Gart          | phosphoribosylformylglycinamide cyclo-lig    | phosphoribosylglycinamide formyltransferas    |
| Gas5          | biological process unknown                   | cell wall (sensu Fungi)                       |
| Gbp2          | nucleus                                      | nucleotide binding                            |
| Gbp4          | GTP binding                                  | cytosol                                       |
| Gemin6        | spliceosome assembly                         | protein binding                               |
| Gins4         | cytoplasm                                    | protein binding                               |
| Gjb2          | protein binding                              | integral to membrane                          |
| Gkn1          | digestion                                    | cell proliferation                            |
| Gmn           | regulation of progression through cell cycle | molecular function unknown                    |
| Gnl3          | regulation of cell proliferation             | biological process unknown                    |
| Gp1ba         | extracellular matrix (sensu Metazoa)         | integral to membrane                          |
| Gpatc4        | nucleic acid binding                         | intracellular                                 |
| Gpiap1        | membrane                                     | integral to plasma membrane                   |
| Grem1         | development                                  | protein binding                               |
| Grwd1         | nucleus                                      |                                               |
| Gtf2h2        | regulation of transcription                  | RNA polymerase II transcription factor activi |
| Gtl2          |                                              |                                               |
| Gtpbp4        | nucleotide binding                           | nucleus                                       |
| H1f0          | development                                  | DNA binding                                   |
| H2-T22        | defense response                             |                                               |
| H2afz         | development                                  | nucleus                                       |
| Hdgf          | cytoplasm                                    | heparin binding                               |
| Heatr1        | binding                                      |                                               |
| Hells         | anti-apoptosis                               | nucleus                                       |
| Hmga2         | transcription                                | chromosome organization and biogenesis (ε     |

|         |                                          |                                           |
|---------|------------------------------------------|-------------------------------------------|
| Hmgb1   | structural constituent of chromatin      | protein binding                           |
| Hmgn1   | response to UV-C                         | nucleus                                   |
| Hmmr    | cytoskeleton organization and biogenesis | cell motility                             |
| Hnrpa1  | transport                                | RNA metabolism                            |
| Hnrpab  | nucleus                                  | nucleic acid binding                      |
| Hnrpd1  | nucleus                                  | ribonucleoprotein complex                 |
| Hod     | development                              | regulation of transcription               |
| Hoxa11  | development                              | nucleus                                   |
| Hoxa9   | development                              | protein binding                           |
| Hrasls  | Ras protein signal transduction          | cytoplasm                                 |
| Hspd1   | protein binding                          | response to heat                          |
| Hspe1   | mitochondrial matrix                     | ATP binding                               |
| Id4     | transcription corepressor activity       | regulation of transcription               |
| Idh1    | isocitrate dehydrogenase (NAD+) activity | cytosol                                   |
| Ifitm2  | protein binding                          | response to biotic stimulus               |
| Ifitm3  | response to biotic stimulus              | integral to membrane                      |
| Igfbp5  | signal transduction                      | regulation of cell growth                 |
| Igtp    | cytosol                                  | GTPase activity                           |
| Iigp1   | nucleotide binding                       | cellular component unknown                |
| Iigp2   | biological process unknown               | cellular component unknown                |
| Iimpdh2 | GMP biosynthesis                         | catalytic activity                        |
| Incenp  | protein binding                          | nucleus                                   |
| Indo    | tryptophan metabolism                    | cytosol                                   |
| Ins1    | positive regulation of vasodilation      | negative regulation of protein catabolism |
| Irgm    | defense response                         | endoplasmic reticulum                     |
| Isg2011 | exonuclease activity                     | nucleus                                   |
| Itga6   | integrin-mediated signaling pathway      | filopodium formation                      |
| Itpka   | calmodulin binding                       | signal transduction                       |
| Kap     | extracellular space                      |                                           |
| Kcnk3   | ion channel activity                     | transport                                 |
| Kcnn4   | calmodulin binding                       | ion channel activity                      |
| Kif11   | kinesin complex                          | microtubule motor activity                |
| Kif22   | mitosis                                  | nucleus                                   |
| Kif2c   | nucleus                                  | microtubule motor activity                |
| Kpnb1   | nuclear localization sequence binding    | protein binding                           |
| Krtap15 |                                          |                                           |
| Krtcap2 | extracellular space                      | integral to membrane                      |

LOC622757  
 LOC623809  
 LOC630539  
 LOC636537  
 LOC640611  
 LOC672274  
 LOC676501  
 LOC677159

|         |                                                                                          |                                              |
|---------|------------------------------------------------------------------------------------------|----------------------------------------------|
| Lap3    | prolyl aminopeptidase activity                                                           | zinc ion binding                             |
| Lats2   | oxidoreductase activity, acting on iron-sulfur                                           | cell division                                |
| Lgals2  | galactoside binding                                                                      | sugar binding                                |
| Lgr5    | signal transduction                                                                      | extracellular matrix (sensu Metazoa)         |
| Lig1    | DNA recombination                                                                        | nucleus                                      |
| Lin9    | DNA binding                                                                              | regulation of transcription                  |
| Lman1   | Golgi apparatus                                                                          | mannose binding                              |
| Lrg1    | cell wall biosynthesis (sensu Fungi)                                                     | cytoplasm                                    |
| Lrig1   | extracellular space                                                                      | integral to membrane                         |
| Lrrc56  |                                                                                          |                                              |
| Lrrc59  | integral to membrane                                                                     | membrane                                     |
| Luzp5   | protein binding                                                                          | inner cell mass cell proliferation           |
| Lyar    | zinc ion binding                                                                         | nucleus                                      |
| Mad211  | mitosis                                                                                  | spindle pole body                            |
| Mcm10   | pre-replicative complex                                                                  | nucleus                                      |
| Mcm2    | DNA unwinding during replication                                                         | protein binding                              |
| Mcm3    | ATP-dependent DNA helicase activity                                                      | nucleoside-triphosphatase activity           |
| Mcm5    | nucleoside-triphosphatase activity                                                       | negative regulation of apoptosis             |
| Mcm6    | protein binding                                                                          | DNA unwinding during replication             |
| Mcm7    | nucleoside-triphosphatase activity                                                       | pre-replicative complex                      |
| Melk    | protein-tyrosine kinase activity                                                         | cytoplasm                                    |
| Mgat2   | Golgi apparatus                                                                          | protein amino acid terminal N-glycosylation  |
| Mia1    | extracellular space                                                                      | extracellular matrix organization and biogen |
| Mki67   | cytoplasm                                                                                | nucleus                                      |
| Mki67ip | cytoplasm                                                                                | biological process unknown                   |
| Moap1   | protein binding                                                                          | nucleus                                      |
| Mod1    | enoyl-[acyl-carrier protein] reductase activity                                          | NAD binding                                  |
| Mpa2l   |                                                                                          |                                              |
| Mtap    | S-methyl-5-thioadenosine phosphorylase ac transferase activity, transferring pentosyl gr |                                              |



|         |                                                             |                                           |
|---------|-------------------------------------------------------------|-------------------------------------------|
| Mthfd2  | methylenetetrahydrofolate dehydrogenase (catalytic activity |                                           |
| Mtm1    | transporter activity                                        | hydrolase activity                        |
| Nap111  | protein binding                                             | nucleus                                   |
| Narg1   | development                                                 | cytoplasm                                 |
| Ncl     | nucleotide binding                                          | DNA binding                               |
| Nedd4   | ubiquitin-protein ligase activity                           | protein binding                           |
| Nek2    | spindle pole                                                | protein binding                           |
| Neto1   | integral to membrane                                        | membrane                                  |
| Neurog3 | development                                                 | regulation of transcription               |
| Nhp211  | nucleus                                                     | ribosome biogenesis and assembly          |
| Nme1    | pyrimidine ribonucleoside triphosphate biosynthesis         | ribonuclease MRP complex                  |
| Nol5    | rRNA methyltransferase activity                             | small nucleolar ribonucleoprotein complex |
| Nol5a   | rRNA processing                                             | nucleus                                   |
| Nola1   | dense fibrillar component                                   | biological process unknown                |
| Nola2   | protein biosynthesis                                        | nucleus                                   |
| Nolc1   | nucleus                                                     | protein binding                           |
| Nono    | DNA recombination                                           | transcription                             |
| Nras    | protein binding                                             | small GTPase mediated signal transduction |
| Nucb2   | calcium ion homeostasis                                     | cytoplasm                                 |
| Nucks1  | nucleus                                                     |                                           |
| Nudcd2  | cellular component unknown                                  | biological process unknown                |
| Nup107  | integral to membrane                                        | protein binding                           |
| Nup155  | transport                                                   | nucleus                                   |
| Nup37   | transport                                                   | integral to membrane                      |
| Nup62   | negative regulation of apoptosis                            | protein binding                           |
| Nusap1  | biological process unknown                                  | spindle microtubule                       |
| Odz4    | gastrulation (sensu Mammalia)                               |                                           |
| Olf157  | integral to membrane                                        | rhodopsin-like receptor activity          |
| Omd     | extracellular space                                         | extracellular matrix (sensu Metazoa)      |
| Orc2l   | DNA replication origin binding                              | protein binding                           |
| P4hb    | protein disulfide oxidoreductase activity                   | extracellular space                       |
| Pa2g4   | nucleus                                                     | protein binding                           |
| Pap     | transcription                                               | sugar binding                             |
| Park2   | ubiquitin-protein ligase activity                           | regulation of neurotransmitter secretion  |
| Pbk     | protein-tyrosine kinase activity                            | protein binding                           |
| Pck2    | cell wall biosynthesis (sensu Fungi)                        | zinc ion binding                          |
| Pcna    | protein binding                                             | nucleus                                   |

|          |                                            |                                            |
|----------|--------------------------------------------|--------------------------------------------|
| Perq1    | cellular component unknown                 | protein binding                            |
| Phgdh    | NAD binding                                | L-serine biosynthesis                      |
| Pitpnm2  | transport                                  | soluble fraction                           |
| Plk4     | protein-tyrosine kinase activity           | protein binding                            |
| Pnmt     | S-adenosylmethionine-dependent methyltra   | catecholamine biosynthesis                 |
| Pnpt1    | carbohydrate metabolism                    | nucleic acid binding                       |
| Pola1    | zinc ion binding                           | nucleus                                    |
| Pold3    | delta DNA polymerase activity              | nucleus                                    |
| Pole     | nucleus                                    | zinc ion binding                           |
| Pole2    | epsilon DNA polymerase activity            | nucleus                                    |
| Polr2a   | nucleus                                    | zinc ion binding                           |
| Polr3f   | nucleus                                    | transcription                              |
| Polr3h   | tricarboxylic acid cycle                   | nucleus                                    |
| Pomt1    | development                                | integral to membrane                       |
| Ppap2a   | integral to membrane                       | integral to plasma membrane                |
| Ppp1r14b | phosphatase inhibitor activity             | protein phosphatase inhibitor activity     |
| Ppp2r2b  | protein phosphatase type 2A complex        | signal transduction                        |
| Ppp3cb   | calmodulin binding                         | calcium-dependent protein serine/threonine |
| Ppp4r2   |                                            |                                            |
| Pprc1    | RNA binding                                | receptor activity                          |
| Prc1     | cytoplasm                                  | vacuole (sensu Fungi)                      |
| Prim1    | DNA primase activity                       | zinc ion binding                           |
| Prkrip1  | protein binding                            | nucleolus                                  |
| Proc     | negative regulation of apoptosis           | serine-type endopeptidase activity         |
| Prps2    | nucleoside metabolism                      | ribonucleoside monophosphate biosynthesis  |
| Psat1    | metabolism                                 | transaminase activity                      |
| Psip1    | DNA binding                                | transcription                              |
| Psmc6    | nucleoside-triphosphatase activity         | cytoplasm                                  |
| Ptpro    | protein tyrosine phosphatase activity      | transmembrane receptor protein tyrosine ph |
| Pycr1    | pyrroline-5-carboxylate reductase activity | electron transport                         |
| Racgap1  | nucleus                                    | zinc ion binding                           |
| Rad51    | nucleoside-triphosphatase activity         | DNA recombination                          |
| Rad51ap1 | DNA recombination                          | nucleus                                    |
| Rad54l   | DNA-dependent ATPase activity              | nucleus                                    |
| Ran      | protein binding                            | nucleocytoplasmic transport                |
| Rangap1  | cell plate                                 | cytoplasm                                  |
| Rbbp4    | nucleus                                    | protein binding                            |

|           |                                          |                                               |
|-----------|------------------------------------------|-----------------------------------------------|
| Rbmx      | nucleotide binding                       | nucleic acid binding                          |
| Rbmxrt    | nucleotide binding                       | nucleus                                       |
| Rcl1      | RNA-3'-phosphate cyclase activity        | molecular function unknown                    |
| Rcn1      | protein phosphatase type 2A complex      | regulation of stomatal movement               |
| Recc1     | nucleoside-triphosphatase activity       | protein binding                               |
| Reg3g     | extracellular space                      | sugar binding                                 |
| Rem2      | two-component signal transduction system | regulation of transcription, DNA-dependent    |
| Retnlb    | extracellular space                      | cytokine activity                             |
| Rexo2     | nucleus                                  | nucleotide metabolism                         |
| Rfc2      | nucleoside-triphosphatase activity       | nucleus                                       |
| Rfc4      | nucleoside-triphosphatase activity       | nucleus                                       |
| Rfc5      | nucleoside-triphosphatase activity       | nucleus                                       |
| Rg9mtd2   | transferase activity                     | methyltransferase activity                    |
| Rif1      | telomeric 3' overhang formation          | nucleus                                       |
| Rnf157    | zinc ion binding                         | metal ion binding                             |
| Rpa1      | DNA recombination                        | protein binding                               |
| Rpa2      | nucleotide-excision repair               | protein binding                               |
| Rpe       | carbohydrate metabolism                  | biological process unknown                    |
| Rpl711    | protein biosynthesis                     | ribonucleoprotein complex                     |
| Rpo1-4    | protein binding                          | nucleus                                       |
| Rpp14     | nucleus                                  | cellular component unknown                    |
| Rps6      | protein biosynthesis                     | small nucleolar ribonucleoprotein complex     |
| Rrm1      | catalytic activity                       | ribonucleoside-diphosphate reductase activity |
| Rrm2      | protein binding                          | deoxyribonucleoside diphosphate metabolism    |
| Rrs1      | nucleus                                  | rRNA processing                               |
| Rsnl2     |                                          |                                               |
| Rtp3      | integral to membrane                     | membrane                                      |
| Scd1      | protein binding                          | cellular morphogenesis                        |
| Sec23b    | COPII vesicle coat                       | transport                                     |
| Serpina10 | extracellular space                      | serine-type endopeptidase inhibitor activity  |
| Set       | phosphatase inhibitor activity           | nucleus                                       |
| Sf3b3     | biological process unknown               | nucleus                                       |
| Sfpq      | protein binding                          | nucleus                                       |
| Sfrs2     | protein binding                          | nucleus                                       |
| Sgol1     | mitosis                                  | cell cycle                                    |
| Shcbp1    | biological process unknown               | cellular component unknown                    |
| Shmt1     | cytoplasm                                | glycine metabolism                            |

|          |                                                  |                                                                      |
|----------|--------------------------------------------------|----------------------------------------------------------------------|
| Shmt2    | glycine metabolism                               | transferase activity                                                 |
| Siva     | cytoplasm                                        | protein binding                                                      |
| Skp2     | G1/S transition of mitotic cell cycle            | regulation of progression through cell cycle                         |
| Slc12a2  | gamma-aminobutyric acid signaling pathway        | protein binding                                                      |
| Slc1a4   | transport                                        | integral to membrane                                                 |
| Slc39a8  | metal ion transport                              | integral to membrane                                                 |
| Slc5a4b  | transporter activity                             | sodium ion transport                                                 |
| Slco3a1  | biological process unknown                       | transport                                                            |
| Smarcad1 | nucleus                                          | nucleic acid binding                                                 |
| Smarcc1  | nucleus                                          | regulation of transcription, DNA-dependent                           |
| Smc111   |                                                  |                                                                      |
| Smc211   |                                                  |                                                                      |
| Smc411   | chromosome organization and biogenesis (nucleus  |                                                                      |
| Smpdl3b  | extracellular space                              | carbohydrate metabolism                                              |
| Snord22  | protein binding                                  | nucleus                                                              |
| Snrpa1   | nucleus                                          | RNA binding                                                          |
| Snrpd3   | cytoplasm                                        | small nucleolar ribonucleoprotein complex                            |
| Snrpg    | small nucleolar ribonucleoprotein complex        | nucleus                                                              |
| Snx10    | phosphoinositide binding                         | transport                                                            |
| Snx6     | transport                                        | protein binding                                                      |
| Socs3    | regulation of protein amino acid phosphorylation | anti-apoptosis                                                       |
| Spats2   | biological process unknown                       | cytoplasm                                                            |
| Spsc25   |                                                  |                                                                      |
| Spdef    | DNA binding                                      | nucleus                                                              |
| Ssrp1    | protein binding                                  | transcription                                                        |
| Stat1    | protein binding                                  | nucleus                                                              |
| Statip1  | regulation of JAK-STAT cascade                   | protein binding                                                      |
| Steap1   | integral to membrane                             | electron transport                                                   |
| Stmn1    | cytoplasm                                        | protein binding                                                      |
| Strap    | protein binding                                  | negative regulation of transcription from RNA polymerase II promoter |
| Suz12    | zinc ion binding                                 | nucleus                                                              |
| Syncrip  | cytoplasm                                        | RNA splicing                                                         |
| Sypl     | transport                                        | integral to membrane                                                 |
| Syt9     | transport                                        | protein binding                                                      |
| T2bp     | cellular component unknown                       | protein binding                                                      |
| Tacc3    | biological process unknown                       | cytoplasm                                                            |
| Taf9     | general RNA polymerase II transcription factor   | G1-specific transcription in mitotic cell cycle                      |

|          |                                           |                                               |
|----------|-------------------------------------------|-----------------------------------------------|
| Tceal8   | transcription                             | nucleus                                       |
| Tcf19    | nucleus                                   | transcription factor complex                  |
| Tdg      | transcription factor binding              | carbohydrate metabolism                       |
| Terf1    | nucleus                                   | protein binding                               |
| Tfam     | nucleus                                   | transcription factor complex                  |
| Tgm2     | proteolysis                               | histone phosphorylation                       |
| Tgtp     | cellular component unknown                | GTP binding                                   |
| Thoc3    | biological process unknown                | transport                                     |
| Timeless | development                               | protein binding                               |
| Tipin    | biological process unknown                | cytoplasm                                     |
| Tk1      | cytoplasm                                 | thymidine kinase activity                     |
| Tmed5    | transport                                 | integral to membrane                          |
| Tmem33   | biological process unknown                | molecular function unknown                    |
| Tmem87a  | integral to membrane                      |                                               |
| Tmpo     | protein binding                           | integral to membrane                          |
| Tnfrsf1b | protein binding                           | integral to membrane                          |
| Top2a    | embryonic cleavage                        | DNA unwinding during replication              |
| Topbp1   | nucleus                                   | meiotic recombination                         |
| Tpm3     | cytoskeleton                              | muscle thin filament tropomyosin              |
| Tpx2     | nucleus                                   | aster                                         |
| Trip13   | nucleoside-triphosphatase activity        | biological process unknown                    |
| Trip6    | zinc ion binding                          | nucleus                                       |
| Tubb5    | protein complex                           | structural molecule activity                  |
| Txndc5   | protein disulfide oxidoreductase activity | electron transport                            |
| Ubap2    |                                           |                                               |
| Ube2c    | ubiquitin-protein ligase activity         | mitosis                                       |
| Uble1a   | nucleus                                   | protein binding                               |
| Uble1b   | transcription factor binding              | catalytic activity                            |
| Uchl5    | protein binding                           | cytosol                                       |
| Ufm1     | nucleus                                   | ubiquitin cycle                               |
| Usp1     | cellular component unknown                | ubiquitin thiolesterase activity              |
| Usp39    | nucleus                                   | zinc ion binding                              |
| Utrn     | protein binding                           | neuromuscular junction                        |
| Vav3     | integrin-mediated signaling pathway       | positive regulation of phosphoinositide 3-kin |
| Vip      | extracellular space                       | vasodilation                                  |
| Wars     | protein biosynthesis                      | cytoplasm                                     |
| Wbp5     | biological process unknown                | cellular component unknown                    |

|        |                                   |                            |
|--------|-----------------------------------|----------------------------|
| Wdr4   | extracellular space               | biological process unknown |
| Wipi2  | biological process unknown        | cellular component unknown |
| Wiz    | zinc ion binding                  | nucleus                    |
| Wnk1   | protein binding                   | circadian rhythm           |
| Wwp1   | ubiquitin-protein ligase activity | protein binding            |
| Xpo1   | protein binding                   | nucleus                    |
| Xpo4   | cellular component unknown        | biological process unknown |
| Zfp142 | DNA binding                       | zinc ion binding           |
| Zfp703 |                                   |                            |
| Zipro1 | development                       | oogenesis                  |
| Zwint  | protein binding                   | nucleus                    |

protein kinase activator activity

protein binding

nucleus

ribonuclease activity

molecular function unknown  
nucleic acid binding

regulation of transcription, DNA-dependent intracellular

serine-type endopeptidase activity

hydrolase activity

peptidase activity

transferase activity  
molecular function unknown  
chemotaxis  
integral to membrane  
molecular function unknown  
structural constituent of cytoskeleton  
protein binding

metal ion binding  
nucleocytoplasmic transport  
nucleotide binding  
long-chain-fatty-acid-CoA ligase activity  
  
structural molecule activity  
regulation of cell growth

kinase activity  
nuclear pore  
cellular component unknown  
catalytic activity  
  
ATP binding  
structural constituent of cytoskeleton

|                                                                                                                                                                                                                                                   |                                                                                                                                                                                                                                 |                                                                                                                                                                                                                                                           |
|---------------------------------------------------------------------------------------------------------------------------------------------------------------------------------------------------------------------------------------------------|---------------------------------------------------------------------------------------------------------------------------------------------------------------------------------------------------------------------------------|-----------------------------------------------------------------------------------------------------------------------------------------------------------------------------------------------------------------------------------------------------------|
| deaminase activity                                                                                                                                                                                                                                | regulation of circadian sleep/wake cycle, sle cellular component unknown                                                                                                                                                        |                                                                                                                                                                                                                                                           |
| transferase activity<br>spermidine biosynthesis                                                                                                                                                                                                   | kinase activity<br>embryonic development (sensu Mammalia)                                                                                                                                                                       | oxidoreductase activity<br>polyamine metabolism                                                                                                                                                                                                           |
| endocytic vesicle<br>protein binding<br>cytoplasm<br>Golgi stack<br>lyase activity<br>nucleus<br>hydrolase activity<br>porin activity<br>ER to Golgi vesicle-mediated transport<br>histone binding<br>asparagine synthase (glutamine-hydrolyzing) | chemotaxis<br>cell cycle<br>nucleus<br>intracellular protein transport<br>perinuclear region<br>apoptosis<br>nucleus<br>basolateral plasma membrane<br>metal ion binding                                                        | lamellipodium<br>ubiquitin cycle<br>cytoplasmic membrane-bound vesicle<br>lysosome<br>transcription regulator activity<br>binding<br>metal ion binding<br>water transport<br>protein transport                                                            |
| mitosis<br>catalytic activity<br>integral to membrane<br>integral to membrane<br>transferase activity<br>nucleus<br>nucleotide binding                                                                                                            | ligase activity<br>cell cycle<br>integral to plasma membrane<br>membrane<br>protein binding<br>kinase activity<br>DNA methylation<br>cytoskeleton organization and biogenesis                                                   | cellular component unknown<br>nucleus<br>hydrogen:potassium-exchanging ATPase ac<br>proton transport<br>integral to plasma membrane<br>ATP binding<br>midbody<br>protein serine/threonine kinase activity                                                 |
| metal ion binding                                                                                                                                                                                                                                 |                                                                                                                                                                                                                                 |                                                                                                                                                                                                                                                           |
| transcription<br>transcription<br>zinc ion binding<br>cellular component unknown<br>integral to membrane<br>protein binding<br>nucleus<br>nucleotide binding<br>molecular function unknown<br>protein binding                                     | zinc ion binding<br>regulation of transcription, DNA-dependent<br>midbody<br>hydrolase activity<br>regulation of striated muscle development<br>nucleic acid binding<br>cell cycle<br>cell division<br>nucleus<br>cell adhesion | nucleus<br>positive regulation of apoptosis<br>spindle microtubule<br>cysteine-type endopeptidase activity<br>integral to plasma membrane<br>double-strand break repair via homologous<br>mitotic cell cycle<br>outer kinetochore of condensed chromosorr |



regulation of translational initiation  
protein binding

translation initiation factor activity  
complement activation

plasma membrane

metal ion binding  
protein binding  
kinetochore  
mitotic metaphase/anaphase transition

one-carbon compound metabolism  
phosphoinositide-mediated signaling  
nuclear heterochromatin  
cell cycle

lyase activity  
metal ion binding  
chromatin binding  
spindle stabilization

cell-cell signaling  
nucleus  
protein binding  
cell cycle  
nucleus  
cytosol  
nucleus  
cytosol  
external side of plasma membrane  
external side of plasma membrane  
cell cycle  
nucleus  
DNA-directed DNA polymerase activity  
septation initiation signaling  
nucleus  
cell cycle

cytokine activity  
protein binding  
regulation of cell cycle  
protein targeting  
protein binding  
G1/S transition of mitotic cell cycle  
cell cycle  
negative regulation of retinal programmed c  
membrane  
hyaluronic acid binding  
M phase of mitotic cell cycle  
mitotic G2 checkpoint  
DNA clamp loader activity  
nucleus  
cell cycle

chemoattractant activity  
cell cycle  
cell division  
regulation of progression through cell cycle  
cell division  
cell division  
DNA replication initiation  
chaperonin-containing T-complex  
GPI anchor binding  
ureteric bud branching  
phosphoprotein phosphatase activity  
nucleotide binding  
pre-replicative complex formation and maint  
nucleotide binding

receptor signaling protein serine/threonine k  
cytoskeleton  
regulation of transcription, DNA-dependent  
cysteine dioxygenase activity  
regulation of S phase of mitotic cell cycle  
regulation of transcription, DNA-dependent  
protein heterodimerization activity  
cell cycle

G1/S transition of mitotic cell cycle  
brain development  
kinase activity  
electron transport  
nucleus  
binding  
kinetochore

cell growth  
cellular component unknown  
oligodendrocyte differentiation  
L-cysteine catabolism to taurine  
cell cycle  
protein homodimerization activity

nucleus  
nucleus

protein binding  
DNA damage checkpoint

nucleotide binding  
nucleotide binding

protein binding  
kinase activity  
membrane  
nucleus  
nucleus  
protein binding  
nuclease activity  
nucleus  
nucleotide binding  
cadherin binding  
pyrimidine nucleotide biosynthesis  
extracellular space  
chemotaxis  
induction of positive chemotaxis

nucleic acid binding  
nucleic acid binding  
DNA binding  
oogenesis  
endoplasmic reticulum  
negative regulation of cell growth  
unfolded protein binding  
protein binding  
protein binding  
nucleus  
nucleus  
protein binding  
nucleic acid binding  
cytoplasm  
protein binding  
cytoplasm  
nucleus  
fatty acid elongation, unsaturated fatty acid  
magnesium ion binding  
paraxial mesoderm development  
protein binding  
integral to plasma membrane

endoplasmic reticulum  
cyclin-dependent protein kinase regulator activity  
structural molecule activity  
visual perception  
actin binding  
protein binding, bridging  
regulation of transcription, DNA-dependent  
mRNA cleavage  
cellular component unknown  
structural molecule activity  
glutamine metabolism  
positive regulation of cell migration  
extracellular space  
extracellular space

nucleoplasm  
ATP binding  
RNA binding  
Rho GTPase binding  
  
G2 phase of mitotic cell cycle

nucleus  
microtubule  
regulation of transcription, DNA-dependent  
guanyl-nucleotide exchange factor activity  
RNA splicing  
ribosome  
translational initiation  
regulation of translational initiation  
regulation of translational initiation  
nucleic acid binding  
integral to plasma membrane  
nucleoside-diphosphatase activity

learning  
nucleotide binding

tight junction  
cytosol  
kinetochore  
microtubule  
metal ion binding  
cellular component unknown  
mRNA cleavage  
cell adhesion  
CTP synthase activity  
muscle development  
chemokine receptor binding  
CXCR3 chemokine receptor binding

DNA replication initiation  
nuclear mRNA splicing, via spliceosome  
GTP binding  
transferase activity

DNA binding  
  
catalytic activity  
motor activity  
cell proliferation  
intracellular signaling cascade  
ribonucleoprotein complex  
transporter activity  
RNA binding  
cAMP-mediated signaling  
RNA binding  
translational initiation  
fatty acid elongation  
vacuole

integral to plasma membrane  
extracellular space

|                                                |                                              |                                                |
|------------------------------------------------|----------------------------------------------|------------------------------------------------|
| linoleoyl-CoA desaturase activity              | metal ion binding                            | long-chain fatty acid biosynthesis             |
| nucleus                                        | zinc ion binding                             | protein binding                                |
| nuclease activity                              | nucleic acid binding                         | ATP binding                                    |
| endoplasmic reticulum membrane                 | hydrolase activity                           | flap endonuclease activity                     |
| rhodopsin-like receptor activity               | receptor activity                            | extracellular space                            |
| ATP binding                                    |                                              |                                                |
| isomerase activity                             | peptidyl-prolyl cis-trans isomerase activity |                                                |
| protein binding                                | cell-cell signaling                          | cell surface receptor linked signal transducti |
| cell surface receptor linked signal transducti | extracellular space                          | metabolism                                     |
| cytoplasm                                      | transferase activity                         | carbohydrate phosphorylation                   |
| phosphoribosylamine-glycine ligase activity    | catalytic activity                           | nucleotide binding                             |
| rRNA processing                                | 1,3-beta-glucanosyltransferase activity      |                                                |
| cellular component unknown                     | poly(A)+ mRNA export from nucleus            | RNA binding                                    |
| GTPase activity                                | immune response                              |                                                |
| nucleus                                        | mRNA processing                              | spliceosome complex                            |
| nucleus                                        |                                              |                                                |
| cell-cell signaling                            | lateral plasma membrane                      | membrane                                       |
| growth factor activity                         | positive regulation of cell proliferation    | extracellular space                            |
| nucleus                                        | cell cycle                                   | organ morphogenesis                            |
| protein binding                                | nucleus                                      | nucleolus                                      |
| cellular morphogenesis                         | integral to plasma membrane                  | cell adhesion                                  |
|                                                |                                              |                                                |
| GPI anchor binding                             |                                              |                                                |
| embryonic limb morphogenesis                   | cell-cell signaling                          | proximal/distal pattern formation              |
|                                                |                                              |                                                |
| nucleus                                        | zinc ion binding                             | nucleic acid binding                           |
|                                                |                                              |                                                |
| ribosome biogenesis                            | GTP binding                                  | small GTPase mediated signal transduction      |
| nucleus                                        | chromosome                                   |                                                |
|                                                |                                              |                                                |
| chromosome organization and biogenesis (c      | nucleosome assembly                          | nucleosome                                     |
| nucleus                                        | signal transduction                          | growth factor activity                         |
|                                                |                                              |                                                |
| DNA methylation                                | nucleic acid binding                         | urogenital system development                  |
| nucleus                                        | DNA packaging                                | regulation of transcription, DNA-dependent     |

|                                                           |                                                  |                                                             |
|-----------------------------------------------------------|--------------------------------------------------|-------------------------------------------------------------|
| nucleus                                                   | heparin binding                                  | cellular morphogenesis                                      |
| positive transcription elongation factor activity         | transcription-coupled nucleotide-excision repair | pyrimidine dimer repair via nucleotide-excision repair      |
| cell-cell signaling                                       | hyaluronic acid binding                          | receptor activity                                           |
| nucleus                                                   | ribonucleoprotein complex                        | nucleic acid binding                                        |
| RNA helicase activity                                     | regulation of transcription, DNA-dependent       | mRNA binding                                                |
| nucleic acid binding                                      | DNA binding                                      | nucleotide binding                                          |
| protein binding                                           | nucleus                                          | transcription                                               |
| metanephros development                                   | transcription factor complex                     | skeletal development                                        |
| nucleus                                                   | transcription factor complex                     | regulation of transcription, DNA-dependent                  |
| molecular function unknown                                | regulation of cell growth                        | nuclear envelope lumen                                      |
| nucleotide binding                                        | chaperone binding                                | protein folding                                             |
| ATPase activity, coupled                                  | response to unfolded protein                     | protein folding                                             |
| nucleus                                                   | negative regulation of astrocyte differentiation | regulation of transcription from RNA polymerase II promoter |
| isocitrate dehydrogenase (NADP+) activity                 | glutamate biosynthesis                           | metabolism                                                  |
| integral to membrane                                      | immune response                                  |                                                             |
| negative regulation of cell proliferation                 | cytoplasmic membrane-bound vesicle               |                                                             |
| intracellular signaling cascade                           | skeletal muscle growth                           | extracellular space                                         |
| identical protein binding                                 | hydrolase activity                               | GTP binding                                                 |
| GTPase activity                                           |                                                  |                                                             |
| metal ion binding                                         | purine nucleotide biosynthesis                   | oxidoreductase activity                                     |
| midbody                                                   | histone phosphorylation                          | cell division                                               |
| heme binding                                              | metal ion binding                                | indoleamine-pyrrole 2,3-dioxygenase activity                |
| alpha-beta T cell activation                              | protein binding                                  | cell surface receptor linked signal transduction            |
| hydrolase activity                                        |                                                  |                                                             |
| protein binding                                           | integral to membrane                             | cell adhesion                                               |
| calcium- and calmodulin-dependent protein kinase activity | transferase activity                             | inositol or phosphatidylinositol kinase activity            |
| integral to membrane                                      | voltage-gated ion channel activity               | integral to plasma membrane                                 |
| integral to membrane                                      | voltage-gated potassium channel activity         | integral to plasma membrane                                 |
| microtubule                                               | mitotic centrosome separation                    | ATP binding                                                 |
| kinesin complex                                           | microtubule motor activity                       | spindle                                                     |
| protein binding                                           | meiosis                                          | motor activity                                              |
| nucleus                                                   | zinc ion binding                                 | protein import into nucleus, docking                        |
| membrane                                                  |                                                  |                                                             |

leucyl aminopeptidase activity  
nucleotide binding  
soluble fraction  
integral to membrane  
morphogenesis  
biological process unknown  
integral to membrane  
integral to membrane  
membrane

nucleic acid binding  
electron transport

rhodopsin-like receptor activity  
nucleotide binding  
cellular component unknown  
ER to Golgi vesicle-mediated transport  
small GTPase mediated signal transduction

proteolysis  
protein amino acid phosphorylation

receptor activity  
cell division  
molecular function unknown  
protein transport  
extracellular space

metal ion binding  
negative regulation of mitotic metaphase/an cell cycle  
chromatin silencing at telomere  
nuclear origin of replication recognition com  
MCM complex  
protein binding  
regulation of transcription, DNA-dependent  
MCM complex  
transferase activity  
integral to membrane  
cell-matrix adhesion  
nucleolus  
protein binding  
regulation of apoptosis  
fatty acid synthase complex

female meiosis chromosome segregation  
regulation of transcription, DNA-dependent  
pre-replicative complex  
regulation of transcription, DNA-dependent  
pre-replicative complex formation and maint  
DNA unwinding during replication  
kinase activity  
transferase activity, transferring glycosyl grc  
cell proliferation  
cell proliferation  
nucleus  
apoptosis  
soluble fraction

nucleus  
chromatin binding  
pre-replicative complex formation and maint  
DNA unwinding during replication  
pre-replicative complex formation and maint  
DNA replication initiation  
protein binding  
ATP binding  
membrane  
extracellular region  
meiosis  
nucleic acid binding  
malic enzyme activity

nucleobase, nucleoside, nucleotide and nuc transferase activity

transferase activity, transferring glycosyl grc

|                                                |                                               |                                               |
|------------------------------------------------|-----------------------------------------------|-----------------------------------------------|
| methenyltetrahydrofolate cyclohydrolase ac     | methylenetetrahydrofolate dehydrogenase (     | one-carbon compound metabolism                |
| muscle development                             | protein amino acid dephosphorylation          | phospholipid dephosphorylation                |
| nucleosome assembly                            | chromatin assembly complex                    | positive regulation of cell proliferation     |
| nucleus                                        | transcription                                 | protein binding                               |
| nucleus                                        | nucleic acid binding                          | RNA binding                                   |
| cytosol                                        | ubiquitin cycle                               | proteolysis                                   |
| midbody                                        | intracellular signaling cascade               | receptor signaling protein serine/threonine k |
| protein targeting                              | receptor activity                             |                                               |
| nucleus                                        | transcription                                 | regulation of transcription, DNA-dependent    |
| ribonucleoprotein complex                      | fertilization (sensu Metazoa)                 | nucleolus                                     |
| ribonuclease MRP activity                      | CTP biosynthesis                              | cytoplasm                                     |
| nucleus                                        | rRNA processing                               | nucleic acid binding                          |
| RNA binding                                    | ribosome biogenesis                           | nucleolus                                     |
| small nucleolar ribonucleoprotein complex      | nucleus                                       | rRNA processing                               |
| rRNA processing                                | ribonucleoprotein complex                     | ribosome biogenesis and assembly              |
| nucleolus                                      | ATP binding                                   | nucleotide binding                            |
| nucleus                                        | nucleic acid binding                          | regulation of transcription, DNA-dependent    |
| protein transport                              | nucleotide binding                            | cellular physiological process                |
| nucleus                                        | cytosol                                       | DNA binding                                   |
|                                                |                                               |                                               |
| molecular function unknown                     |                                               |                                               |
| nucleus                                        | cytosol                                       | porin activity                                |
| integral to membrane                           | porin activity                                | nucleocytoplasmic transport                   |
| nucleus                                        | outer membrane                                | porin activity                                |
| cell surface receptor linked signal transducti | nucleocytoplasmic transport                   | hormone-mediated signaling                    |
| nucleolus                                      | positive regulation of mitosis                | cytokinesis after mitosis                     |
|                                                |                                               |                                               |
| integral to plasma membrane                    | receptor activity                             | sensory perception of smell                   |
| protein binding                                | extracellular matrix structural constituent   | regulation of bone mineralization             |
| nucleus                                        | nuclear origin of replication recognition com | origin recognition complex                    |
| cell surface                                   | membrane                                      | protein folding                               |
| regulation of transcription, DNA-dependent     | hydrolase activity                            | ribosome assembly                             |
| nucleic acid binding                           | inflammatory response                         | extracellular space                           |
| protein binding                                | neuron projection                             | proteolysis                                   |
| transferase activity                           | kinase activity                               | peptidyl-serine phosphorylation               |
| intracellular signaling cascade                | gluconeogenesis                               | phosphoenolpyruvate carboxykinase activity    |
| DNA replication factor C complex               | lagging strand elongation                     | DNA polymerase processivity factor activity   |

|                                                       |                                              |                                                 |
|-------------------------------------------------------|----------------------------------------------|-------------------------------------------------|
| insulin-like growth factor receptor signaling pathway |                                              |                                                 |
| electron carrier activity                             | oxidoreductase activity                      | brain development                               |
| phospholipid binding                                  | metal ion binding                            | oxidoreductase activity                         |
| transferase activity                                  | kinase activity                              | ATP binding                                     |
| S-adenosylhomocysteine metabolism                     | transferase activity                         | phenylethanolamine N-methyltransferase ac       |
| hydrolase activity, hydrolyzing O-glycosyl co         | transferase activity                         | nucleotidyltransferase activity                 |
| alpha DNA polymerase activity                         | DNA-directed DNA polymerase activity         | nucleotidyltransferase activity                 |
| mismatch repair                                       | DNA-directed DNA polymerase activity         | nucleotidyltransferase activity                 |
| DNA-directed DNA polymerase activity                  | nucleotidyltransferase activity              | nucleotide binding                              |
| nucleic acid binding                                  | DNA-directed DNA polymerase activity         | transferase activity                            |
| protein binding                                       | transcription                                | nucleotidyltransferase activity                 |
| nucleotidyltransferase activity                       | transferase activity                         | regulation of transcription, DNA-dependent      |
| transcription                                         | nucleic acid binding                         | nucleotidyltransferase activity                 |
| mannosyltransferase activity                          | extracellular matrix organization and biogen | transferase activity, transferring glycosyl grc |
| diacylglycerol biosynthesis                           | ceramide metabolism                          | hydrolase activity                              |
| protein phosphatase type 1 regulator activity         |                                              |                                                 |
| protein phosphatase type 2A regulator activ           | spermatid development                        |                                                 |
| zinc ion binding                                      | protein binding                              | protein heterodimerization activity             |

|                                 |                                                |                                            |
|---------------------------------|------------------------------------------------|--------------------------------------------|
| cell cycle                      | nucleus                                        | spindle                                    |
| nucleotidyltransferase activity | transferase activity                           | metal ion binding                          |
| double-stranded RNA binding     | negative regulation of protein kinase activity | negative regulation of phosphorylation     |
| anti-inflammatory response      | negative regulation of blood coagulation       | proteolysis                                |
| transferase activity            | metal ion binding                              | kinase activity                            |
| transferase activity            | L-serine biosynthesis                          | amino acid biosynthesis                    |
| nucleus                         | regulation of transcription, DNA-dependent     |                                            |
| nucleus                         | nucleic acid binding                           | protein complex                            |
| integral to membrane            | integral to plasma membrane                    | transmembrane receptor protein tyrosine ph |
| amino acid biosynthesis         | proline biosynthesis                           | oxidoreductase activity                    |
| intracellular signaling cascade | cell division                                  | electron transport                         |
| response to methylmercury       | protein binding                                | telomere maintenance via recombination     |
| DNA binding                     | response to DNA damage stimulus                | molecular function unknown                 |
| nucleic acid binding            | ATP binding                                    | helicase activity                          |
| regulation of cell shape        | small GTPase mediated signal transduction      | spermatid development                      |
| Ran GTPase activator activity   | M phase specific microtubule process           | signal transduction                        |
| cell cycle                      | transcription                                  | chromatin modification                     |

|                                               |                                            |                                              |
|-----------------------------------------------|--------------------------------------------|----------------------------------------------|
| ribonucleoprotein complex                     | RNA binding                                | ribonucleoprotein complex                    |
| nucleic acid binding                          | RNA binding                                | nucleolus                                    |
| 35S primary transcript processing             | nucleus                                    | calcium-dependent protein serine/threonine   |
| calcium-mediated signaling                    | extracellular space                        | DNA replication factor C complex             |
| nucleus                                       | zinc ion binding                           |                                              |
| acute-phase response                          | inflammatory response                      |                                              |
| small GTPase mediated signal transduction     | nucleotide binding                         | DNA binding                                  |
| hormone activity                              | extracellular region                       | hydrolase activity                           |
| nuclease activity                             | exonuclease activity                       | Ctf18 RFC-like complex                       |
| cytosol                                       | DNA replication factor C complex           | DNA replication factor C complex             |
| protein complex                               | cytosol                                    | DNA replication factor C complex             |
| protein complex                               | cytosol                                    |                                              |
|                                               |                                            |                                              |
| protein binding                               | nuclear telomeric heterochromatin          | female pronucleus                            |
|                                               |                                            |                                              |
| nucleus                                       | zinc ion binding                           | nucleic acid binding                         |
| nucleus                                       | zinc ion binding                           | nucleic acid binding                         |
| cytoplasm                                     | secretory pathway                          | cellular component unknown                   |
| ribosome                                      | large ribosomal subunit                    | transcription regulator activity             |
| transcription                                 | zinc ion binding                           | nucleotidyltransferase activity              |
| molecular function unknown                    | hydrolase activity                         | tRNA processing                              |
| nucleic acid binding                          | ribosome                                   | cytosolic small ribosomal subunit (sensu Eu) |
| ATP binding                                   | oxidoreductase activity                    | nucleotide binding                           |
| ribonucleoside-diphosphate reductase activity | metal ion binding                          | oxidoreductase activity                      |
| ribosome biogenesis and assembly              | molecular function unknown                 | ribosome biogenesis                          |
|                                               |                                            |                                              |
|                                               |                                            |                                              |
| intracellular signaling cascade               | integral to endoplasmic reticulum membrane | microtubule cytoskeleton organization and b  |
| zinc ion binding                              | protein binding                            | ER to Golgi vesicle-mediated transport       |
| endopeptidase inhibitor activity              | tissue regeneration                        |                                              |
| nucleosome assembly                           | spermatogenesis                            | DNA binding                                  |
| protein binding                               | RNA splicing                               | nucleic acid binding                         |
| nucleic acid binding                          | regulation of transcription, DNA-dependent | nucleotide binding                           |
| nucleic acid binding                          | nucleotide binding                         | cellular component unknown                   |
| nucleus                                       | meiotic chromosome segregation             | cell division                                |
| SH2 domain binding                            | molecular function unknown                 | protein binding                              |
| cytosol                                       | transferase activity                       | one-carbon compound metabolism               |



|                                            |                                              |                                                 |
|--------------------------------------------|----------------------------------------------|-------------------------------------------------|
| L-serine metabolism                        | pyridoxal phosphate binding                  | mitochondrial inner membrane                    |
| apoptosis                                  | CD27 receptor binding                        | induction of apoptosis                          |
| ubiquitin cycle                            | ubiquitin-dependent protein catabolism       | ubiquitin ligase complex                        |
| integral to membrane                       | integral to plasma membrane                  | sodium:potassium:chloride symporter activity    |
| L-serine transport                         | L-serine transporter activity                | dicarboxylic acid transport                     |
| zinc ion transporter activity              | extracellular space                          | zinc ion transport                              |
| transport                                  | integral to membrane                         | ion transport                                   |
| integral to membrane                       | prostaglandin transport                      | transporter activity                            |
| ATP binding                                | helicase activity                            | DNA binding                                     |
| chromatin binding                          | chromatin assembly or disassembly            | intracellular                                   |
| protein heterodimerization activity        | condensin complex                            | ATP binding                                     |
| hydrolase activity                         | hydrolase activity, acting on glycosyl bonds |                                                 |
| ribonucleoprotein complex                  | ribonucleoprotein complex                    | nuclear mRNA splicing, via spliceosome          |
| nucleus                                    | nuclear mRNA splicing, via spliceosome       | RNA splicing factor activity, transesterificati |
| ribonucleoprotein complex                  | intracellular signaling cascade              | protein transport                               |
| protein binding                            | protein transport                            | phosphoinositide binding                        |
| intracellular signaling cascade            | signal transduction                          | regulation of cell growth                       |
| protein binding                            |                                              |                                                 |
| molecular function unknown                 |                                              |                                                 |
| transcription                              | sequence-specific DNA binding                | regulation of transcription, DNA-dependent      |
| nucleus                                    | regulation of transcription, DNA-dependent   | DNA binding                                     |
| regulation of transcription, DNA-dependent | intracellular signaling cascade              | I-kappaB kinase/NF-kappaB cascade               |
| transcription elongation factor complex    | protein kinase binding                       |                                                 |
| iron ion binding                           | membrane                                     | FAD binding                                     |
| tubulin binding                            | microtubule                                  | intracellular signaling cascade                 |
| receptor binding                           | kinase activity                              | negative regulation of transforming growth f    |
| nucleic acid binding                       | histone methyltransferase activity           | regulation of transcription, DNA-dependent      |
| nucleus                                    | ribonucleoprotein complex                    | nucleic acid binding                            |
| vesicle-mediated transport                 | transporter activity                         | synaptic vesicle                                |
| integral to membrane                       | metal ion binding                            | synapse                                         |
| I-kappaB kinase/NF-kappaB cascade          |                                              |                                                 |
| protein binding                            | response to stress                           | hemopoiesis                                     |
| regulation of transcription, DNA-dependent | transcription coactivator activity           | SLIK (SAGA-like) complex                        |

|                                                  |                                                     |                                               |
|--------------------------------------------------|-----------------------------------------------------|-----------------------------------------------|
| regulation of transcription, DNA-dependent       | transcription factor activity                       |                                               |
| regulation of transcription, DNA-dependent       | protein domain specific binding                     | base-excision repair                          |
| nucleus                                          | chromosome, telomeric region                        | mitosis                                       |
| cell division                                    | positive regulation of transcription, DNA-dependent | apoptosis                                     |
| regulation of transcription, DNA-dependent       | elevation of cytosolic calcium ion concentration    | calcium ion binding                           |
| peptide cross-linking                            |                                                     |                                               |
| nucleus                                          | nuclear mRNA splicing, via spliceosome              | mRNA export from nucleus                      |
| nucleus                                          | circadian rhythm                                    | regulation of transcription, DNA-dependent    |
| protein binding                                  | nucleus                                             |                                               |
| transferase activity                             | kinase activity                                     | ATP binding                                   |
| membrane                                         | ER-Golgi intermediate compartment                   | endoplasmic reticulum                         |
| protein binding                                  | integral to membrane                                | membrane                                      |
| nucleus                                          | mitotic nuclear envelope reassembly                 | chromatin binding                             |
| cell surface receptor linked signal transduction | extracellular space                                 | membrane                                      |
| nucleus                                          | nucleotide binding                                  | positive regulation of transcription from RNA |
| DNA binding                                      | response to DNA damage stimulus                     | condensed nuclear chromosome                  |
| regulation of muscle contraction                 | actin binding                                       |                                               |
| spindle microtubule                              | protein kinase binding                              | mitotic spindle assembly                      |
| nucleus                                          | protein binding                                     | transcription cofactor activity               |
| heme binding                                     | regulation of transcription, DNA-dependent          | metal ion binding                             |
| nucleotide binding                               | GTP binding                                         | microtubule-based movement                    |
| isomerase activity                               | electron carrier activity                           | endoplasmic reticulum                         |
| cell cycle                                       | ubiquitin cycle                                     | positive regulation of cell proliferation     |
| catalytic activity                               | ubiquitin activating enzyme activity                | ubiquitin cycle                               |
| ubiquitin activating enzyme activity             | ubiquitin cycle                                     | ATP binding                                   |
| protein complex                                  | cysteine-type peptidase activity                    | ubiquitin cycle                               |
| cysteine-type endopeptidase activity             | ubiquitin-dependent protein catabolism              | peptidase activity                            |
| nucleic acid binding                             | metal ion binding                                   | nuclear mRNA splicing, via spliceosome        |
| structural molecule activity                     | adult somatic muscle development                    | chemotaxis                                    |
| guanyl-nucleotide exchange factor activity       | zinc ion binding                                    | intracellular signaling cascade               |
| hormone activity                                 | extracellular region                                |                                               |
| soluble fraction                                 | tryptophan-tRNA ligase activity                     | aminoacyl-tRNA ligase activity                |
| WW domain binding                                |                                                     |                                               |

cellular component unknown  
cytoplasm  
nucleic acid binding  
nucleotide binding  
chloroplast  
protein import into nucleus, docking  
transport  
transcription

nucleus  
exocytosis

tRNA processing  
molecular function unknown  
metal ion binding  
cellular component unknown  
cellular component unknown  
nuclear export  
nucleus  
nucleus

zinc ion binding

molecular function unknown  
autophagy

protein serine/threonine kinase activity  
protein ubiquitination  
binding  
binding  
regulation of transcription, DNA-dependent

nucleic acid binding

metal ion binding

nucleotide biosynthesis

plastid  
ligase activity

nucleotide binding  
chromatin modification

electron transport  
metabolism

cytoskeleton  
regulation of transcription, DNA-dependent

membrane  
magnesium ion binding

cytoskeleton organization and biogenesis  
ATP binding

|                                                                                                                                                                                                                                |                                                                                                                                                                                                   |                                                                                                                                                                                                        |
|--------------------------------------------------------------------------------------------------------------------------------------------------------------------------------------------------------------------------------|---------------------------------------------------------------------------------------------------------------------------------------------------------------------------------------------------|--------------------------------------------------------------------------------------------------------------------------------------------------------------------------------------------------------|
| transcription regulator activity                                                                                                                                                                                               | hydrolase activity                                                                                                                                                                                | DNA repair                                                                                                                                                                                             |
| membrane spermine biosynthesis                                                                                                                                                                                                 | glutamate 5-kinase activity<br>AMP deaminase activity                                                                                                                                             | amino acid biosynthesis<br>lyase activity                                                                                                                                                              |
| embryonic development (sensu Mammalia)<br>cell division                                                                                                                                                                        | external side of plasma membrane<br>regulation of progression through cell cycle                                                                                                                  | receptor activity                                                                                                                                                                                      |
| intracellular transport<br>transcription coactivator activity<br>spliceosome complex                                                                                                                                           | clathrin vesicle coat<br>cytoplasm                                                                                                                                                                | protein targeting to lysosome<br>metal ion binding                                                                                                                                                     |
| integral to plasma membrane<br>Golgi stack                                                                                                                                                                                     | microvillus<br>regulation of GTPase activity                                                                                                                                                      | transporter activity<br>GTPase activator activity                                                                                                                                                      |
| metabolism<br>binding<br>nucleotide binding<br>receptor activity<br>inflammatory response<br>nucleotide binding<br>cell division<br>protein amino acid phosphorylation                                                         | amino acid metabolism<br>cell division<br>metabolism<br><br>receptor activity<br>mitotic cell cycle<br>nucleotide binding<br>cytoplasm                                                            | amino acid biosynthesis<br>cellular component unknown<br>hydrolase activity<br><br>extracellular space<br>protein amino acid phosphorylation<br>protein serine/threonine kinase activity<br>cell cycle |
| nucleic acid binding<br>DNA binding<br>microtubule cytoskeleton organization and b<br>response to toxin<br>cell adhesion<br>extracellular space<br>mitotic chromosome condensation<br>protein serine/threonine kinase activity | regulation of transcription, DNA-dependent<br>negative regulation of transcription<br>caspase inhibitor activity<br>cytoplasm<br>membrane<br>DNA repair<br><br>protein amino acid phosphorylation | T cell differentiation<br>transcriptional repressor activity<br>cell division<br>response to drug<br>smoothened signaling pathway<br>chromatin remodeling<br><br>mitosis                               |

|                                                    |                                                    |                                              |
|----------------------------------------------------|----------------------------------------------------|----------------------------------------------|
| mitochondrion                                      | immune response                                    |                                              |
| membrane                                           | carbonate dehydratase activity                     |                                              |
| one-carbon compound metabolism                     | carbonate dehydratase activity                     |                                              |
| chromatin                                          | chromatin assembly or disassembly                  |                                              |
| microtubule                                        | cell division                                      | cellular component unknown                   |
| chemotaxis                                         | extracellular space                                | chemokine activity                           |
| cell division                                      | regulation of progression through cell cycle       | cyclin-dependent protein kinase regulator ac |
| protein amino acid phosphorylation                 | G2/M transition of mitotic cell cycle              | cyclin-dependent protein kinase regulator ac |
| cytokinesis                                        | cyclin-dependent protein kinase regulator activity |                                              |
| regulation of progression through cell cycle       | cyclin-dependent protein kinase regulator activity |                                              |
| protein amino acid phosphorylation                 | cyclin-dependent protein kinase regulator ac       | eye morphogenesis (sensu Vertebrata)         |
| cyclin-dependent protein kinase regulator activity |                                                    |                                              |
| tubulin folding                                    | nucleotide binding                                 | centrosome                                   |
| cell adhesion                                      | receptor activity                                  | membrane                                     |
| cell division                                      | phosphoric monoester hydrolase activity            | hydrolase activity                           |
| cell division                                      | G1 phase of mitotic cell cycle                     | protein amino acid phosphorylation           |
| mitosis                                            | cytoplasm                                          | spindle                                      |
| cell division                                      | cellular component unknown                         | DNA replication initiation                   |
| cyclin-dependent protein kinase activity           | protein serine/threonine kinase activity           | mitosis                                      |
| molecular function unknown                         | neuronal Cdc2-like kinase binding                  | protein kinase binding                       |
| DNA binding                                        | transcription factor activity                      |                                              |
| taurine biosynthesis                               | sulfur amino acid biosynthesis                     | L-cysteine metabolism                        |
| DNA binding                                        | S phase of mitotic cell cycle                      | DNA replication initiation                   |
| cytoplasm                                          | response to drug                                   | nuclear matrix                               |
| condensed nuclear chromosome                       | DNA repair                                         | protein amino acid phosphorylation           |
| protein serine/threonine kinase activity           | protein amino acid phosphorylation                 | cell cycle                                   |

|                                                |                                                |                                                          |
|------------------------------------------------|------------------------------------------------|----------------------------------------------------------|
| circulation                                    | plasma membrane                                | chloride transport                                       |
| actin cytoskeleton organization and biogenesis | chromosome segregation                         | molecular function unknown                               |
| actin binding                                  | smooth muscle contraction                      | actin filament                                           |
| exonuclease activity                           | hydrolase activity                             | magnesium ion binding                                    |
| molecular function unknown                     | RNA binding                                    | mRNA processing                                          |
| RNA binding                                    | mRNA processing                                | mRNA polyadenylation                                     |
| actin cytoskeleton                             | cytoskeleton                                   | molecular function unknown                               |
|                                                |                                                |                                                          |
| sensory perception                             | electron transport                             | immune response                                          |
| chemokine activity                             | immune response                                | extracellular region                                     |
| chemokine activity                             | immune response                                | extracellular region                                     |
|                                                |                                                |                                                          |
| protein amino acid phosphorylation             | protein serine/threonine kinase activity       | DNA replication                                          |
| helicase activity                              | mRNA export from nucleus                       | nucleotide binding                                       |
| membrane                                       | mRNA processing                                |                                                          |
| kinase activity                                | actin binding                                  | nucleotide binding                                       |
|                                                |                                                |                                                          |
| protein folding                                | unfolded protein binding                       | heat shock protein binding                               |
|                                                |                                                |                                                          |
| DNA methylation                                | regulation of transcription, DNA-dependent     | heterochromatin                                          |
| cytoplasmic dynein complex                     | microtubule-based process                      | dynein complex                                           |
| DNA binding                                    | protein homodimerization activity              |                                                          |
| regulation of Rho protein signal transduction  | regulation of progression through cell cycle   | cellular physiological process                           |
| nuclear mRNA splicing, via spliceosome         | nucleotide binding                             | GTP binding                                              |
| translational initiation                       | RNA binding                                    | membrane                                                 |
| regulation of translation                      | translation initiation factor activity         |                                                          |
| cellular component unknown                     | insulin receptor signaling pathway             | negative regulation of translational initiation          |
| translation initiation factor activity         | regulation of translation                      |                                                          |
| apoptosis                                      | translation initiation factor activity         |                                                          |
| very-long-chain fatty acid biosynthesis        | long-chain fatty acid biosynthesis             |                                                          |
| lysosome                                       | membrane                                       | calcium ion binding                                      |
|                                                |                                                |                                                          |
| nucleotide binding                             | membrane                                       | positive regulation of long-term neuronal synaptogenesis |
| membrane                                       | transmembrane receptor protein tyrosine kinase | protein serine/threonine kinase activity                 |

|                                                            |                                              |                                                |
|------------------------------------------------------------|----------------------------------------------|------------------------------------------------|
| oxidoreductase activity                                    |                                              |                                                |
| ubiquitin cycle                                            | metal ion binding                            | gametogenesis                                  |
| helicase activity                                          | nucleotide binding                           | DNA binding                                    |
| 5'-flap endonuclease activity                              | fatty acid elongase activity                 | exonuclease activity                           |
| G-protein coupled receptor protein signaling membrane      |                                              | purinergic nucleotide receptor activity, G-pro |
| epithelial cell differentiation                            | metabolism                                   | membrane                                       |
| membrane                                                   | G-protein coupled receptor activity          | signal transducer activity                     |
| phosphotransferase activity, alcohol group phosphorylation | phosphorylation                              | kinase activity                                |
| purine base biosynthesis                                   | cytoplasm                                    | transferase activity                           |
| membrane                                                   | GTP binding                                  | GTPase activity                                |
| nuclear mRNA splicing, via spliceosome                     |                                              |                                                |
| plasma membrane                                            | gap-junction forming channel activity        | connexon channel activity                      |
| cell growth                                                | regulation of progression through cell cycle | secretory granule                              |
| negative regulation of DNA replication                     |                                              |                                                |
| cell proliferation                                         | nucleotide binding                           | regulation of progression through cell cycle   |
| membrane fraction                                          | hemostasis                                   | plasma membrane                                |
| cytokine activity                                          | negative regulation of cell growth           | extracellular space                            |
| DNA repair                                                 |                                              |                                                |
| Barr body                                                  | DNA binding                                  | chromosome                                     |
| cell proliferation                                         | extracellular space                          | cellular physiological process                 |
| helicase activity                                          | DNA binding                                  | ATP-dependent helicase activity                |
| DNA binding                                                | nuclear chromosome                           | chromatin                                      |



|                                                                                                                                     |                                                                                                                                                                                           |                                                                                                                                                                                               |
|-------------------------------------------------------------------------------------------------------------------------------------|-------------------------------------------------------------------------------------------------------------------------------------------------------------------------------------------|-----------------------------------------------------------------------------------------------------------------------------------------------------------------------------------------------|
| regulation of transcription, DNA-dependent<br>DNA binding                                                                           | extracellular space<br>RNA polymerase II transcription factor activi                                                                                                                      | chromatin binding<br>response to UV-B                                                                                                                                                         |
| RNA processing<br>nucleotide binding<br>RNA binding<br>heart development<br>regulation of transcription, DNA-dependent<br>cytoplasm | mRNA export from nucleus<br>DNA replication origin binding<br>mRNA metabolism<br>regulation of transcription, DNA-dependent<br>regulation of transcription<br>regulation of transcription | nucleotide binding<br>transcription<br>DNA binding<br>transcription<br>transcription                                                                                                          |
| cellular protein metabolism<br>unfolded protein binding<br>positive regulation of cell proliferation<br>isocitrate metabolism       | mitochondrion<br>mitochondrion<br>negative regulation of transcription<br>mitochondrial nucleoid                                                                                          | cytoplasm<br>neuroblast proliferation (sensu Vertebrata)<br>glyoxylate cycle                                                                                                                  |
| insulin-like growth factor binding protein con                                                                                      | insulin-like growth factor binding                                                                                                                                                        | growth factor binding                                                                                                                                                                         |
| membrane                                                                                                                            | cytokine and chemokine mediated signaling                                                                                                                                                 | GTPase activity                                                                                                                                                                               |
| potassium ion binding<br>protein localization<br>oxidoreductase activity, acting on single dor<br>cell-cell signaling               | lymphocyte proliferation<br>central element<br>oxidoreductase activity<br>extracellular space                                                                                             | IMP dehydrogenase activity<br>synaptonemal complex<br>defense response<br>membrane                                                                                                            |
| odontogenesis (sensu Vertebrata)<br>myo-inositol metabolism                                                                         | membrane<br>kinase activity                                                                                                                                                               | calcium ion binding<br>ATP binding                                                                                                                                                            |
| potassium ion transport<br>membrane<br>motor activity<br>microtubule<br>nucleotide binding<br>binding                               | extracellular space<br>transport<br>nucleotide binding<br>kinetochore<br>microtubule associated complex<br>protein transport                                                              | potassium ion binding<br>voltage-gated potassium channel complex<br>microtubule associated complex<br>ATP binding<br>microtubule-based movement<br>protein import into nucleus, translocation |

transcription regulator activity  
protein serine/threonine kinase activity

hydrolase activity  
mitosis

protein metabolism  
cell cycle

extracellular space  
RNA ligase (ATP) activity  
receptor activity  
endoplasmic reticulum membrane  
membrane

G-protein coupled receptor protein signaling  
DNA repair  
protein-hormone receptor activity  
DNA replication

membrane  
Rho GTPase activator activity

protein folding  
bud neck

kinetochore  
DNA strand elongation  
DNA replication initiation  
nucleus  
mitotic cell cycle  
DNA helicase activity  
nucleus  
nucleotide binding  
protein amino acid N-linked glycosylation via  
growth factor activity  
chromosome, pericentric region  
nucleolus

cell division  
pre-replicative complex formation and maint  
DNA helicase activity  
cytosol  
DNA replication initiation  
DNA-dependent ATPase activity  
nucleic acid binding  
protein serine/threonine kinase activity

condensed chromosome  
nucleotide binding

molecular function unknown  
DNA replication initiation  
DNA-dependent ATPase activity  
nucleic acid binding  
DNA helicase activity  
cytoplasm  
regulation of transcription, DNA-dependent  
protein amino acid phosphorylation  
acetylglucosaminyltransferase activity

RNA binding

malate metabolism

metal ion binding

oxidoreductase activity

ups

|                                               |                                               |                                               |
|-----------------------------------------------|-----------------------------------------------|-----------------------------------------------|
| oxidoreductase activity                       | extracellular space                           | cellular component unknown                    |
| muscle maintenance                            | protein serine/threonine phosphatase activity | mitochondrion                                 |
| DNA replication                               |                                               |                                               |
| regulation of transcription, DNA-dependent    | binding                                       | receptor activity                             |
| nucleolus                                     |                                               |                                               |
| ubiquitin ligase complex                      | ligase activity                               | protein ubiquitination                        |
| centrosome cycle                              | condensed nuclear chromosome                  | protein serine/threonine kinase activity      |
| epithelial cell differentiation               | DNA binding                                   | positive regulation of transcription from RNA |
| nuclear mRNA splicing, via spliceosome        | regulation of progression through cell cycle  | RNA binding                                   |
| rRNA processing                               | transferase activity                          | microsome                                     |
| nucleolus                                     | cell growth                                   | snoRNP binding                                |
| ribonucleoprotein complex                     | rRNA binding                                  | snoRNA binding                                |
| ribosome                                      | ribosome biogenesis                           | RNA binding                                   |
| regulation of protein import into nucleus     | GTP binding                                   | nucleoplasm                                   |
| nuclear mRNA splicing, via spliceosome        | DNA binding                                   | nucleotide binding                            |
| membrane                                      | GTP binding                                   | intracellular                                 |
| extracellular space                           | Golgi medial cisterna                         | ER-Golgi intermediate compartment             |
| Nup107-160 complex                            | nucleocytoplasmic transport                   | protein transport                             |
| transporter activity                          | structural constituent of nuclear pore        | nucleocytoplasmic transporter activity        |
| protein transport                             |                                               |                                               |
| transcription regulator activity              | nucleocytoplasmic shuttling complex           | outer membrane                                |
| establishment of mitotic spindle localization | microtubule binding                           | mitotic chromosome condensation               |
| G-protein coupled receptor protein signaling  | olfactory receptor activity                   |                                               |
| cell adhesion                                 |                                               |                                               |
| inner kinetochore of condensed chromosome     | chromatin                                     | DNA replication initiation                    |
| ER-Golgi intermediate compartment             | endoplasmic reticulum                         | microsome                                     |
| regulation of translation                     | cell cycle arrest                             | regulation of protein biosynthesis            |
| acute-phase response                          | polynucleotide adenylyltransferase activity   |                                               |
| regulation of synaptic transmission           | synaptic transmission, dopaminergic           | dopamine uptake                               |
| ATP binding                                   | peptidyl-threonine phosphorylation            | nucleotide binding                            |
| protein kinase C activity                     | regulation of cell shape                      | lyase activity                                |
| DNA repair                                    | DNA replication                               | leading strand elongation                     |

metabolism  
electron transport  
nucleotide binding  
S-adenosylmethionine metabolism  
RNA processing  
lagging strand elongation  
transferase activity  
hydrolase activity  
nucleotidyltransferase activity  
transferase activity  
DNA binding  
transferase activity  
protein amino acid O-linked glycosylation  
membrane

phosphoglycerate dehydrogenase activity  
membrane  
protein amino acid phosphorylation  
methyltransferase activity  
3'-5'-exoribonuclease activity  
protein heterodimerization activity  
DNA binding  
DNA repair  
epsilon DNA polymerase complex  
nucleolus  
DNA-directed RNA polymerase activity  
citrate metabolism  
endoplasmic reticulum membrane  
phospholipid dephosphorylation

amino acid biosynthesis  
calcium ion binding  
protein serine/threonine kinase activity  
epinephrine biosynthesis  
RNA binding  
nucleotide binding  
DNA synthesis during DNA repair  
DNA replication  
DNA-dependent DNA replication  
metal ion binding  
  
iron ion binding  
neuron migration  
protein amino acid dephosphorylation

hydrolase activity

insoluble fraction

protein amino acid dephosphorylation

microtubule  
alpha DNA polymerase:primase complex  
protein kinase binding  
extracellular space  
nucleotide biosynthesis  
phosphoserine transaminase activity

vacuolar lumen (sensu Fungi)  
DNA replication, synthesis of RNA primer  
protein kinase inhibitor activity  
hydrolase activity  
magnesium ion binding

cell division  
DNA-directed RNA polymerase activity  
  
amino acid metabolism  
lipoate-protein ligase B activity

cytosol  
receptor activity

ATP binding  
hydrolase activity

nucleotide binding  
nervous system development

intracellular  
condensed nuclear chromosome  
RNA binding  
DNA binding  
microtubule cytoskeleton organization and transport  
soluble fraction  
regulation of transcription, DNA-dependent

diacylglycerol binding  
intracellular  
DNA repair  
nucleotide binding  
cell adhesion  
perinuclear region  
chromatin remodeling

transport  
DNA-dependent ATPase activity  
  
response to DNA damage stimulus  
intracellular protein transport  
nuclear envelope  
NuRD complex

## RNA processing

|                                                                                                                                                                                                                                                                              |                                                                                                                                                                                                                                                              |                                                                                                                                                         |
|------------------------------------------------------------------------------------------------------------------------------------------------------------------------------------------------------------------------------------------------------------------------------|--------------------------------------------------------------------------------------------------------------------------------------------------------------------------------------------------------------------------------------------------------------|---------------------------------------------------------------------------------------------------------------------------------------------------------|
| protein phosphatase type 2A regulator activity<br>regulation of transcription, DNA-dependent                                                                                                                                                                                 | auxin polar transport<br>nucleotide binding                                                                                                                                                                                                                  | calcineurin complex<br>DNA repair                                                                                                                       |
| membrane                                                                                                                                                                                                                                                                     | GTP binding                                                                                                                                                                                                                                                  | GTPase activity                                                                                                                                         |
| 3'-5' exonuclease activity<br>nucleotide binding<br>Ctf18 RFC-like complex<br>Ctf18 RFC-like complex                                                                                                                                                                         | manganese ion binding<br>DNA replication checkpoint<br>nucleotide binding<br>ATPase activity                                                                                                                                                                 | nucleobase, nucleoside, nucleotide and nuc<br>DNA clamp loader activity<br>DNA clamp loader activity<br>nucleotide binding                              |
| chromosome, telomeric region                                                                                                                                                                                                                                                 | nuclear telomere cap complex                                                                                                                                                                                                                                 | male pronucleus                                                                                                                                         |
| meiosis<br>base-excision repair<br>generation of precursor metabolites and ene<br>intracellular<br>transferase activity<br>RNA binding<br>ribosome biogenesis<br>ribonucleoside-diphosphate reductase com<br>iron ion binding<br>defense response to pathogenic bacteria, in | chromatin binding<br>gene silencing<br>molecular function unknown<br>structural constituent of ribosome<br>metal ion binding<br>ribonuclease activity<br>intracellular<br>DNA replication<br>deoxyribonucleotide metabolism<br>transcription factor activity | DNA repair<br>plastid<br>pentose-phosphate shunt<br><br>DNA binding<br>response to pathogenic fungi<br>regulation of translation<br><br>DNA replication |
| copper, zinc superoxide dismutase activity<br>protein transport                                                                                                                                                                                                              | oxidoreductase activity, acting on paired do<br>perinuclear region                                                                                                                                                                                           | membrane<br>intracellular protein transport                                                                                                             |
| cyclin binding<br>protein complex assembly<br>cellular component unknown<br>mRNA processing<br>chromosome segregation                                                                                                                                                        | DNA replication<br>RNA splicing factor activity, transesterificati<br>DNA repair<br>spliceosome complex<br>chromosome, pericentric region                                                                                                                    | endoplasmic reticulum<br>small nuclear ribonucleoprotein complex<br>mRNA processing<br>transcription corepressor activity                               |
| L-serine metabolism                                                                                                                                                                                                                                                          | pyridoxal phosphate binding                                                                                                                                                                                                                                  | L-serine catabolism                                                                                                                                     |

methyltransferase activity  
positive regulation of apoptosis  
kinase activity  
transporter activity  
sodium:dicarboxylate symporter activity  
membrane  
membrane  
ion transport  
nucleotide binding  
regulation of transcription

mitochondrion  
  
positive regulation of cell volume  
membrane  
metal ion transporter activity  
  
molecular function unknown  
hydrolase activity  
transcription

glycine hydroxymethyltransferase activity  
  
membrane  
symporter activity  
  
membrane  
ATP-dependent helicase activity  
DNA packaging

chromosome segregation

mitotic chromosome condensation

molecular function unknown  
RNA binding

mRNA processing  
mRNA processing

mRNA metabolism  
mRNA metabolism

intracellular protein transport  
negative regulation of signal transduction

protein transporter activity  
intracellular signaling cascade

negative regulation of insulin receptor signa

transcription factor activity  
transcription regulator activity  
caspase activation

response to DNA damage stimulus  
tyrosine phosphorylation of STAT protein

chromatin  
transcription from RNA polymerase II promc

oxidoreductase activity  
negative regulation of microtubule polymeriz  
receptor activity  
chromatin binding  
nuclear mRNA splicing, via spliceosome  
membrane  
transporter activity

positive regulation of cell motility  
  
ESC/E(Z) complex  
nucleotide binding  
secretory granule  
synaptic vesicle

microtubule depolymerization  
  
intracellular  
RNA binding  
  
membrane

cellular component unknown  
TATA-binding protein binding

centrosome  
chromatin modification

regulation of progression through cell cycle  
transferase activity

|                                                                                                                               |                                                                                                        |                                                                                               |
|-------------------------------------------------------------------------------------------------------------------------------|--------------------------------------------------------------------------------------------------------|-----------------------------------------------------------------------------------------------|
| uracil DNA N-glycosylase activity<br>regulation of transcription<br>mitochondrion<br>protein serine/threonine kinase activity | response to DNA damage stimulus<br>cell cycle<br>regulation of transcription<br>enzyme binding         | hydrolase activity<br>chromosome organization and biogenesis (s<br>transcription<br>cytoplasm |
| cellular component unknown<br>regulation of circadian rhythm                                                                  | molecular function unknown<br>protein heterodimerization activity                                      | RNA binding<br>rhythmic process                                                               |
| nucleotide binding                                                                                                            | cellular component unknown                                                                             | nucleobase, nucleoside, nucleotide and nuc                                                    |
| membrane<br>tumor necrosis factor receptor activity<br>DNA topoisomerase complex (ATP-hydrolyz<br>DNA repair                  | nuclear inner membrane<br>immune response<br>DNA topoisomerase (ATP-hydrolyzing) acti<br>intracellular | hormone activity<br>negative regulation of inflammatory respons<br>DNA metabolism             |
| ATP binding<br>electron carrier activity<br>protein polymerization                                                            | nucleotide binding<br>receptor activity<br>microtubule-based process                                   | cellular component unknown<br>DNA binding<br>cytoplasm                                        |
| cell division<br>protein heterodimerization activity<br>electron carrier activity<br>hydrolase activity                       | ligase activity<br>ligase activity<br>ligase activity<br>ubiquitin thiolesterase activity              | cytokinesis<br>cellular component unknown<br>nucleotide binding<br>intracellular              |
| DNA binding<br>actin filament binding<br>small GTPase mediated signal transduction                                            | cysteine-type endopeptidase activity<br>growth cone<br>Rac guanyl-nucleotide exchange factor acti      | ubiquitin thiolesterase activity<br>muscle development<br>regulation of GTPase activity       |
| tRNA aminoacylation for protein translation                                                                                   | ATP binding                                                                                            | ligase activity                                                                               |

protein amino acid phosphorylation  
intracellular  
protein transport  
protein transport  
metal ion binding

protein kinase inhibitor activity  
protein modification  
protein export from nucleus

vesicular fraction  
biological process unknown  
nucleoplasm

regulation of transcription, DNA-dependent cell differentiation

intracellular



protein folding  
membrane

actin filament  
chromatin binding

mitochondrion  
fatty acid metabolism

muscle contraction  
actin filament

transport  
mitochondrial inner membrane

chromatin remodeling

|                                                 |                                                  |                                    |
|-------------------------------------------------|--------------------------------------------------|------------------------------------|
| purine base metabolism                          | purine ribonucleoside monophosphate biosynthesis | adenosine deaminase activity       |
| glutamate-5-semialdehyde dehydrogenase activity | proline biosynthesis                             | mitochondrion                      |
| adenosylmethionine decarboxylase activity       | cellular component unknown                       | carboxy-lyase activity             |
| positive regulation of embryonic development    | vasculogenesis                                   | cell migration during gastrulation |
| oxidoreductase activity                         | nucleus                                          | nuclease activity                  |
| extracellular space                             | membrane                                         | outer membrane                     |
| Golgi membrane                                  |                                                  |                                    |
| asparagine biosynthesis                         |                                                  |                                    |
| molecular function unknown                      |                                                  |                                    |
| hydrogen ion transporter activity               | membrane                                         | gastric acid secretion             |
| membrane                                        | plasma membrane                                  | regulation of body size            |
| protein serine/threonine kinase activity        | protein kinase activity                          | ubiquitin protein ligase binding   |
| protein amino acid phosphorylation              | N-methyltransferase activity                     | mitosis                            |
| MAP kinase kinase kinase activity               | transferase activity                             | metal ion binding                  |
| metal ion binding                               | hemopoiesis                                      | B cell differentiation             |
| negative regulation of neuron apoptosis         | apoptosis                                        | intracellular                      |
| bleomycin hydrolase activity                    | cysteine-type peptidase activity                 | soluble fraction                   |
| axon guidance                                   |                                                  |                                    |
| regulation of transcription                     | cytoplasm                                        | mitotic checkpoint                 |
| cell cycle                                      | transferase activity                             | kinase activity                    |

molecular function unknown

antimicrobial humoral response (sensu Vert immune response)  
activity  
mitosis

cell cycle

extracellular region

kinase activity

cell cycle

kinase activity

regulation of progression through cell cycle

cytoskeleton organization and biogenesis

protein folding

cellular protein metabolism

protein amino acid dephosphorylation  
protein serine/threonine kinase activity  
S phase of mitotic cell cycle  
nucleoplasm

intracellular  
mitosis  
pre-replicative complex  
protein amino acid phosphorylation

cell cycle  
nucleus  
protein serine/threonine kinase activity

regulation of cell growth

transferase activity

kinase activity

inflammatory response  
DNA replication

electron carrier activity  
mitochondrion

oxidoreductase activity

molecular function unknown

chromosome, pericentric region

development

protein serine/threonine kinase activity  
transferase activity

G2/M transition of mitotic cell cycle  
metal ion binding

cell cycle checkpoint  
kinase activity

regulation of cell volume  
smooth muscle contraction  
microtubule binding  
RNA binding  
mRNA polyadenylation

regulation of smooth muscle contraction  
troponin C binding

tropomyosin binding

signal transduction

cell motility

cytokine activity

cell cycle  
ATP-dependent helicase activity

regulation of S phase of mitotic cell cycle  
hydrolase activity

kinase activity  
mRNA processing

actin cytoskeleton organization and biogenesis cell differentiation

cell organization and biogenesis

DNA replication

site-specific DNA-methyltransferase (cytosine DNA (cytosine-5-)-methyltransferase activity) negative regulation of transcription from RNA

intracellular  
translation elongation factor activity  
translation initiation factor activity

GTPase activator activity  
GTPase activity

Rho guanyl-nucleotide exchange factor activity  
mRNA processing

negative regulation of protein biosynthesis regulation of translation

translation initiation factor activity

transmembrane receptor protein tyrosine kinase activity  
protein amino acid phosphorylation transmembrane-ephrin receptor activity

protein amino acid phosphorylation  
transferase activity

ligase activity  
response to DNA damage stimulus  
nucleus  
G-protein coupled receptor activity

response to DNA damage stimulus  
ATP-dependent helicase activity  
nuclease activity  
lipid binding

nuclear envelope  
hydrolase activity  
nucleic acid binding  
signal transducer activity

regulation of osteoblast differentiation  
signal transduction  
ATP binding  
purine nucleotide biosynthesis

G-protein coupled receptor activity  
non-G-protein coupled 7TM receptor activity  
nucleotide binding  
ATP binding

signal transducer activity  
receptor activity  
metabolism  
hydroxymethyl-, formyl- and related transfer

telomeric DNA binding

telomere maintenance

immune response

transport

male genitalia development

gap junction

molecular function unknown

GTP binding

intracellular

nervous system development

organ morphogenesis

apoptosis

chromatin binding  
chromosome

chromatin silencing

lymphocyte differentiation

chromatin assembly or disassembly  
chromatin binding

RNA binding  
ribonucleoprotein complex

sequence-specific DNA binding  
pattern specification  
pattern specification

regulation of apoptosis

transcription regulator activity  
carbohydrate metabolism

extracellular region

GDP binding

mitosis  
iron ion binding  
carbohydrate metabolism

plasma membrane  
inositol trisphosphate 3-kinase activity

ion transport  
defense response  
microtubule-based movement  
motor activity  
centromeric DNA binding  
protein import into nucleus

transport  
chromatin

single-stranded DNA binding  
RNA processing

negative regulation of transcription from RN  
DNA binding  
transcriptional activator activity

protein import into mitochondrial matrix

negative regulation of neuron differentiation  
main pathways of carbohydrate metabolism  
tricarboxylic acid cycle

endoplasmic reticulum

cell cycle  
tryptophan catabolism to kynurenine  
physiological process

integrin complex  
nucleotide binding

membrane  
potassium ion transport  
microtubule-based process  
nucleotide binding  
mitosis  
nuclear pore

nitric oxide biosynthesis  
establishment and/or maintenance of chrom

mRNA processing  
mRNA editing

transcription factor activity  
organ morphogenesis  
DNA binding

ATP binding

microtubule  
immune response  
positive regulation of nitric-oxide synthase a

basolateral plasma membrane  
cellular component unknown

synaptic transmission  
ion transport  
mitochondrion  
chromatin  
kinesin complex  
biological process unknown

intracellular  
transferase activity

membrane  
cell cycle

ER-Golgi intermediate compartment  
extracellular region

chromosome, pericentric region  
chromatin silencing at silent mating-type ca:  
cytoplasm  
regulation of transcription, DNA-dependent  
DNA-dependent ATPase activity  
oogenesis (sensu Insecta)  
nucleotide binding  
protein kinase activity  
transferase activity

condensed chromosome

fatty acid biosynthesis

mitochondrion  
metal ion binding

G-protein coupled receptor activity  
ATP binding

calcium ion binding  
mitochondrion

mitotic spindle checkpoint  
DNA replication  
nucleosome assembly  
nucleotide binding  
cytoplasm  
S phase of mitotic cell cycle  
chromatin binding  
  
Golgi stack

malate dehydrogenase (decarboxylating) ac malate dehydrogenase (oxaloacetate-decar

cytoplasm  
kinase activity

signal transducer activity  
DNA ligase (ATP) activity

endoplasmic reticulum

mitotic sister chromatid segregation  
chromosome condensation  
metal ion binding  
chromatin binding  
S phase of mitotic cell cycle  
single-stranded DNA binding  
pre-replicative complex formation and maint  
  
protein amino acid N-linked glycosylation

|                                                                                                                                                                                                 |                                                                                                                                              |                                                                                                                   |
|-------------------------------------------------------------------------------------------------------------------------------------------------------------------------------------------------|----------------------------------------------------------------------------------------------------------------------------------------------|-------------------------------------------------------------------------------------------------------------------|
| hydrolase activity<br>protein tyrosine phosphatase activity                                                                                                                                     | magnesium ion binding<br>inositol or phosphatidylinositol phosphatase transport                                                              | folic acid and derivative biosynthesis                                                                            |
| angiogenesis                                                                                                                                                                                    | cell differentiation                                                                                                                         | N-acetyltransferase activity                                                                                      |
| intracellular<br>regulation of mitosis                                                                                                                                                          | axon guidance<br>mitosis                                                                                                                     | protein modification<br>cytoplasm                                                                                 |
| transcription regulator activity<br>mRNA processing<br>metal ion binding<br>unfolded protein binding                                                                                            | cell differentiation<br>plasma membrane<br>kinase activity<br>snRNP protein import into nucleus                                              | nervous system development<br>spliceosome complex<br>lactation<br>rRNA modification                               |
| ribosome biogenesis<br>structural constituent of ribosome<br>nucleolus organization and biogenesis<br>response to DNA damage stimulus<br>Ras protein signal transduction<br>calcium ion binding | RNA binding<br><br>small nuclear ribonucleoprotein complex<br>RNA binding<br>regulation of progression through cell cycle<br>plasma membrane | Cajal body<br>DNA repair<br>Golgi stack<br>nuclear outer membrane                                                 |
| rRNA export from nucleus<br>outer membrane                                                                                                                                                      | outer membrane<br>nuclear pore                                                                                                               | nuclear pore                                                                                                      |
| negative regulation of non-apoptotic program<br>mitotic sister chromatid segregation                                                                                                            | protein serine/threonine kinase activity                                                                                                     | transport                                                                                                         |
| negative regulation of transcription from RNA<br>DNA replication<br>electron carrier activity<br>transcription                                                                                  | peptidyl-proline hydroxylation to 4-hydroxy-L<br>rRNA processing                                                                             | protein disulfide isomerase activity<br>ribonucleoprotein complex                                                 |
| intracellular<br>cellular component unknown<br>nucleotide binding<br>phosphoinositide-mediated signaling                                                                                        | dopamine metabolism<br>protein amino acid phosphorylation<br>GTP binding<br>base-excision repair, gap-filling                                | ubiquitin cycle<br>protein serine/threonine kinase activity<br>protein amino acid phosphorylation<br>PCNA complex |



oxidoreductase activity, acting on the CH-OH group of donors, NAD or NADP as acceptor

intracellular

lipid binding

protein kinase activity

polyribonucleotide nucleotidyltransferase activity

plastid

DNA replication initiation

purine nucleotide binding

delta DNA polymerase complex

DNA replication

transferase activity

metal ion binding

DNA binding

DNA binding

DNA repair

DNA replication

DNA binding

DNA-directed RNA polymerase II, core com transcription from RNA polymerase II promc

DNA-directed RNA polymerase activity

mitochondrion

membrane

dolichyl-phosphate-mannose-protein mannc endoplasmic reticulum

protein kinase C activation

plasma membrane

signal transduction

muscle maintenance

protein serine/threonine phosphatase activit soluble fraction

vacuolar protein catabolism

cytokinesis

carboxypeptidase C activity

DNA replication

calcium ion binding

negative regulation of actin filament polyme receptor binding

ribose phosphate diphosphokinase activity

hydrolase activity

protein catabolism

peptidase activity

membrane

protein amino acid dephosphorylation

plasma membrane

cell cycle

signal transduction

metal ion binding

meiotic recombination

meiotic joint molecule formation

nuclear chromosome

ATP-dependent helicase activity

hydrolase activity

DNA repair

cellular physiological process

intracellular

cytoplasm

protein import into nucleus

GTPase activator activity

nuclear pore

DNA replication

calcium ion binding  
intracellular

response to ethylene stimulus  
DNA replication

positive regulation of abscisic acid mediated  
transcription

intracellular  
DNA replication initiation  
Rad17 RFC-like complex  
DNA clamp loader activity

mitochondrion  
Rad17 RFC-like complex  
purine nucleotide binding  
DNA replication initiation

purine nucleotide binding  
DNA replication  
DNA repair

cell cycle

chromatin silencing at telomere

nucleolus

DNA replication  
DNA repair  
plastid

transcription  
mitochondrion  
isomerase activity

DNA-dependent DNA replication  
DNA replication  
ribulose-phosphate 3-epimerase activity

DNA-directed RNA polymerase I complex  
ribonuclease P activity  
cytosolic ribosome (sensu Eukaryota)

DNA-directed RNA polymerase activity  
immune response

cytoplasm

endocytosis  
endoplasmic reticulum

cell tip

spindle

spliceosome complex  
biological process unknown  
RNA splicing

RNA splicing  
nuclear mRNA splicing, via spliceosome

transcription  
nuclear speck

methyltransferase activity

mitochondrion

glycine hydroxymethyltransferase activity

symporter activity  
neutral amino acid transporter activity

chloride transport

amino acid transport

chromatin modification

DNA binding

SWI/SNF complex

spliceosome complex

protein kinase cascade

JAK-STAT cascade

protein kinase inhibitor activity

DNA repair  
calcium ion binding

chromosome  
JAK-STAT cascade

DNA replication  
signal transducer activity

mitotic spindle organization and biogenesis axonogenesis

negative regulation of transcription from RN  
mRNA processing

biological process unknown  
poly(A) binding

histone ubiquitination

calcium ion binding

molecular function unknown  
kinase activity

cytoplasmic sequestering of transcription factor  
establishment and/or maintenance of chrom SAGA complex

|                                                                                                                          |                                                                                                                               |                                                                                                                 |
|--------------------------------------------------------------------------------------------------------------------------|-------------------------------------------------------------------------------------------------------------------------------|-----------------------------------------------------------------------------------------------------------------|
| DNA repair<br>double-stranded telomeric DNA binding<br>transcription from mitochondrial promoter<br>transferase activity | negative regulation of transcription from RNA polymerase II promoter<br>DNA binding<br>p53 binding<br>protein oligomerization | transcriptional repressor activity<br>chromosome<br>embryonic development (sensu Mammalia)<br>metal ion binding |
| mRNA processing<br>negative regulation of transcription                                                                  | lung development                                                                                                              | protein homodimerization activity                                                                               |
| DNA replication                                                                                                          |                                                                                                                               |                                                                                                                 |
| nuclear envelope reassembly<br>inflammatory response<br>DNA topological change                                           | regulation of transcription<br>cell proliferation<br>nucleolus                                                                | nuclear envelope-endoplasmic reticulum membrane<br>receptor activity<br>ATP binding                             |
| identical protein binding<br>electron transport<br>microtubule                                                           | transcription from RNA polymerase II promoter<br><br>tubulin                                                                  | structural constituent of cytoskeleton                                                                          |
| cyclin catabolism<br>protein ubiquitination<br>electron transport<br>ubiquitin-dependent protein catabolism              | ubiquitin-dependent protein catabolism<br>protein C-terminus binding<br>protein modification<br>peptidase activity            | protein modification<br>protein modification                                                                    |
| intracellular<br>membrane<br>epidermal growth factor receptor binding                                                    | ubiquitin-dependent protein catabolism<br>calcium ion binding<br>plasma membrane                                              | mRNA processing<br>plasma membrane<br>intracellular                                                             |
| nucleotide binding                                                                                                       | negative regulation of cell proliferation                                                                                     | tryptophanyl-tRNA aminoacylation                                                                                |

soluble fraction  
signal transduction  
mRNA processing

transferase activity  
ubiquitin cycle  
nuclear pore

kinase activity  
central nervous system development  
cytoplasm

transcription

spermatogenesis

transcriptional activator activity

ATP binding  
mitochondrion

electron carrier activity

viral capsid assembly

chromatin remodeling complex

immune response

cytoplasm

purine nucleotide metabolism

negative regulation of angiogenesis

gastrulation (sensu Mammalia)

base-excision repair

ribosome

cellular component unknown

water channel activity

proton transport

transport

hydrolase activity, acting on acid anhydrides

cell cycle  
kinase activity

spindle  
ATP binding

transferase activity  
magnesium ion binding

intracellular

G2/M transition of mitotic cell cycle  
carboxypeptidase activity

mitosis  
aminopeptidase activity

cytoplasm  
peptidase activity

regulation of S phase of mitotic cell cycle

transcriptional activator activity

regulation of progression through cell cycle

ATP binding

protein kinase activity

regulation of progression through cell cycle cytokinesis

tissue regeneration

re-entry into mitotic cell cycle

cyclin-dependent protein kinase holoenzyme fat cell differentiation

cytoplasm

ATP binding

embryonic eye morphogenesis

transferase activity  
zinc ion binding  
cell cycle

Hsp70 protein binding  
ATPase activity  
M phase of mitotic cell cycle

kinase activity  
nucleotide binding  
transferase activity

cyclin-dependent protein kinase holoenzyme protein kinase activity

regulation of cell proliferation

oxidoreductase activity, acting on single donor iron ion binding

cysteine metabolism

transcription factor binding

nucleus

dynein binding

cell cycle  
ATP binding

meiotic recombination  
response to DNA damage stimulus

regulation of cyclin-dependent protein kinase  
magnesium ion binding



inflammatory response

electron carrier activity

positive regulation of cell proliferation

metal ion binding

traversing start control point of mitotic cell cycle regulation of DNA replication

transcriptional repressor activity

S-adenosylmethionine-dependent methyltransferase maintenance of DNA methylation

spliceosome complex

receptor binding  
kinase activity

transmembrane-ephrin receptor activity  
receptor activity

regulation of axonogenesis  
ATP binding

DNA repair  
DNA repair  
UV protection

fatty acid elongation

exodeoxyribonuclease activity

signal transduction  
Wnt receptor signaling pathway  
galactose metabolism  
ligase activity

non-G-protein coupled 7TM receptor activity  
oxidoreductase activity

Wnt receptor signaling pathway  
G-protein coupled receptor protein signaling

'de novo' IMP biosynthesis

biosynthesis

cell communication

connexon complex

sensory perception of sound

DNA packaging  
nuclear architecture

DNA binding

chromatin

DNA binding

RNA binding

negative regulation of transcription, DNA-de

transcriptional repressor activity  
induction of an organ  
organ morphogenesis

sequence-specific DNA binding  
sequence-specific DNA binding

transcription factor activity  
transcription factor activity

response to unfolded protein

fin regeneration

tissue regeneration

cytoplasm

mitochondrial matrix

soluble fraction

chromosome, pericentric region

microtubule binding

metaphase plate congression

cell death

positive regulation of nitric oxide biosynthesis  
extracellular region

receptor activity

cell-substrate junction assembly

cell-matrix adhesion

potassium channel activity  
membrane fraction

calcium-activated potassium channel activity  
positive regulation of protein secretion

microtubule-based process  
microtubule  
transport

ATP binding  
cytoplasm

cell proliferation  
ribosomal protein import into nucleus

cysteine-type peptidase activity  
ATP binding

metal ion binding  
magnesium ion binding

aminopeptidase activity  
negative regulation of progression through c

tRNA splicing

DNA ligase activity

DNA binding

transport

blood coagulation

sugar binding

S phase of mitotic cell cycle  
pre-replicative complex formation and maint  
chromosome condensation  
ATP-dependent DNA helicase activity  
DNA replication initiation

chromosome condensation  
DNA replication initiation  
MCM complex  
pre-replicative complex  
DNA replication

ATP-dependent DNA helicase activity  
DNA replication  
pre-replicative complex  
MCM complex  
DNA-dependent ATPase activity

membrane fraction

oligosaccharide biosynthesis

oxidoreductase activity, acting on the CH-OH group of donors, NAD or NADP as acceptor

mitochondrion  
metallochaperone activity

phosphoprotein phosphatase activity

mitochondrial inner membrane

transferase activity

metal ion binding

kinase activity

transcription factor activity

nucleoside diphosphate kinase activity

negative regulation of cell proliferation

GTP biosynthesis

mRNA processing  
membrane fraction  
endoplasmic reticulum

GTPase activity

nuclear membrane

transport

mRNA export from nucleus

cytoplasm

regulation of signal transduction

nucleocytoplasmic transporter activity

isomerase activity  
cobalt ion binding

unfolded protein binding  
cell proliferation

extracellular region  
DNA binding

metal ion binding  
protein kinase activity  
alpha-glucan biosynthesis  
cell proliferation

locomotory behavior

ubiquitin-dependent protein catabolism

mitochondrion  
DNA binding

cell tip  
regulation of progression through cell cycle

|                                      |                                              |                                           |
|--------------------------------------|----------------------------------------------|-------------------------------------------|
| DNA replication                      | pyrimidine nucleotide binding                | transferase activity                      |
| response to DNA damage stimulus      | 3'-5' exonuclease activity                   |                                           |
| DNA-directed RNA polymerase activity |                                              |                                           |
| carbohydrate metabolism              | transferase activity                         | metal ion binding                         |
| sphingosine metabolism               | phosphatidate phosphatase activity           | regulation of lipid metabolism            |
| phosphoprotein phosphatase activity  | heart development                            | metal ion binding                         |
| endoplasmic reticulum                |                                              |                                           |
| proline biosynthesis                 | negative regulation of inflammatory response | blood coagulation                         |
| electron carrier activity            | iron ion binding                             | GTPase activator activity                 |
| nucleus                              | double-strand break repair via single-strand | double-strand break repair via homologous |
| transport                            | GTPase activity                              | nucleus                                   |

endoplasmic reticulum  
DNA-dependent DNA replication

enzyme activator activity

metal ion binding

DNA replication  
leading strand elongation  
Rad17 RFC-like complex

cell cycle checkpoint  
sister chromatid cohesion  
DNA replication

leading strand elongation  
mismatch repair  
leading strand elongation

response to DNA damage stimulus

protection from non-homologous end joining chromosome

metal ion binding  
protein N-terminus binding  
cytoplasmic membrane-bound vesicle

mRNA export from nucleus  
transcription

DNA binding  
DNA-dependent DNA replication

ribonucleoprotein complex

RNA binding

structural constituent of ribosome

microsome

metal ion binding

oxidoreductase activity

nuclear mRNA splicing, via spliceosome  
mRNA splice site selection

DNA binding  
RNA binding

response to DNA damage stimulus

hyperosmotic response

sodium ion transport

transport

chromatin

organ morphogenesis

cytoplasm

transcription

signal transduction

transcription

sex chromatin

chromatin modification

histone acetylation

nucleus

adenylate kinase activity



hydrolase activity, acting on glycosyl bonds  
telomere maintenance via telomerase  
mitochondrion organization and biogenesis  
molecular function unknown

telomere maintenance  
regulation of transcription from RNA polyme  
DNA binding  
positive regulation of smooth muscle cell pr  
histone acetylation

biological process unknown

transcription

morphogenesis of an epithelium

lamin binding  
cell death  
DNA binding

DNA binding  
cytokine and chemokine mediated signaling  
chromosome segregation

nuclear envelope  
RNA destabilization  
chromosome

cytoskeleton

GTPase activity

mitotic spindle assembly

cortical actin cytoskeleton  
diacylglycerol binding

cell junction  
Rho guanyl-nucleotide exchange factor acti

transmembrane receptor activity  
vesicle fusion

ATP binding  
ubiquitin ligase complex  
transport

protein kinase activity  
ligase activity  
mRNA export from nucleus

molecular function unknown  
nuclear envelope

metal ion binding

DNA binding

transcription factor activity

iron ion binding

unfolded protein binding

DNA metabolism

nucleotide metabolism

metal ion binding

DNA repair

endoplasmic reticulum

regulation of cell redox homeostasis

monovalent inorganic cation transporter activity metal ion binding

ATPase activity, coupled to transmembrane

kinase activity  
protein kinase activity

ATP binding

DNA binding

anti-apoptosis

cell cycle

endopeptidase inhibitor activity

response to DNA damage stimulus

establishment and/or maintenance of chrom single-stranded DNA binding

protein kinase activity

cytoskeleton

ATP binding  
cell division  
kinase activity

nucleus

pronucleus

transferase activity  
protein kinase activity

unfolded protein binding

protein kinase activity  
chromatin binding  
ATP binding

transcription factor complex

G2 phase of mitotic cell cycle

kinase activity

chaperonin-mediated tubulin folding

DNA strand elongation  
protein kinase activity

cell division

cell division

ATP binding

chemokine activity

extracellular region

transcription

protein domain specific binding

transferase activity

transferase activity  
ephrin receptor activity

kinase activity  
axon guidance

receptor activity  
axon guidance receptor activity

DNA repair

DNA replication

endoplasmic reticulum

receptor activity  
| pathway

G-protein coupled receptor protein signaling pathway

nervous system development

chromosome

nitric-oxide synthase regulator activity

pendent

unfolded protein binding

mitochondrial inner membrane

oxidoreductase activity

oxidoreductase activity, acting on NADH or RNA binding

condensed chromosome

insulin receptor binding

regulation of protein secretion

sterol metabolism

NLS-bearing substrate import into nucleus

molecular function unknown

protein transporter activity



magnesium ion binding  
protein kinase activity

manganese ion binding

response to antibiotic

ligase activity

response to DNA damage stimulus

Golgi stack

unfolded protein binding

Golgi membrane

pre-replicative complex  
DNA-dependent ATPase activity  
nucleus  
nucleus  
DNA helicase activity

MCM complex  
DNA helicase activity  
nucleic acid binding  
chorion gene amplification  
DNA replication origin binding

nucleus  
cytoplasm  
cytosol  
nucleic acid binding  
cell cycle

manganese ion transport

protein kinase activity

mitotic sister chromatid segregation

protein-tyrosine kinase activity

nucleoside triphosphate biosynthesis

nucleus

deoxyribonuclease activity

nucleocytoplasmic transporter activity

poly(A)+ mRNA export from nucleus

cell death

negative regulation of cell proliferation

positive regulation of transcription

procollagen-proline 4-dioxygenase activity

RNA binding

negative regulation of transcription, DNA-de transcription factor activity

norepinephrine metabolism

zinc ion binding

learning

diacylglycerol binding

nuclear lamina

barrier septum

cyclin-dependent protein kinase holoenzyme replication fork

kinase activity

|                                            |                                                      |                                          |
|--------------------------------------------|------------------------------------------------------|------------------------------------------|
| alpha DNA polymerase:primase complex       | metal ion binding                                    | DNA replication, synthesis of RNA primer |
| magnesium ion binding<br>membrane fraction | negative regulation of cell proliferation            | androgen receptor signaling pathway      |
| T cell differentiation                     | iron ion binding                                     | response to amphetamine                  |
| actin nucleation                           | protein domain specific binding                      | phospholipid binding                     |
| strand invasion                            | double-strand break repair via synthesis-dej meiosis |                                          |
| RNA localization                           | protein targeting                                    | protein transport                        |

ATP binding

DNA binding

specific transcriptional repressor activity

sister chromatid cohesion  
ATP binding  
sister chromatid cohesion

mismatch repair  
DNA binding  
mismatch repair

ATP binding  
Elg1 RFC-like complex  
ATP binding

telomere maintenance via telomerase

telomeric DNA binding

telomere cap complex

transcription from RNA polymerase I promoter  
nucleolus

DNA-directed RNA polymerase I complex  
DNA binding

single-stranded DNA binding  
transcription from RNA polymerase I promoter

iron ion binding

regulation of Cdc42 GTPase activity

GTPase activator activity

RNA binding

basolateral plasma membrane

amino acid-polyamine transporter activity potassium ion transport

hematopoietin/interferon-class (D200-domain) DNA binding

regulation of progression through cell cycle

metal ion binding

positive regulation of cell proliferation

histone methylation

cytosol

nucleotide binding

transcription from RNA polymerase II promoter

mitochondrial DNA replication      transcription initiation from mitochondrial promoter      transcription factor activity  
protein-glutamine gamma-glutamyltransferase      blood vessel remodeling      acyltransferase activity

DNA binding      branching morphogenesis of a tube

chromosome      condensed chromosome  
DNA topoisomerase activity      isomerase activity      condensed chromosome

signal transduction      synapse      actin binding  
lamellipodium biogenesis      cell migration      cytoplasm

entry of virus into host cell  
response to virus

RNA binding

protein transporter activity





adenosine metabolism

antimicrobial humoral response (sensu Vertebrata)

ribonuclease H activity

phosphodiesterase I activity

endonuclease activity

ATP binding

potassium ion transport

potassium ion binding

chromosome, pericentric region

cytokinesis

chromosome

metal ion binding

embryonic development

cysteine protease inhibitor activity

secretory granule

DNA replication  
regulation of DNA replication

cell cycle

ATP binding

nucleotide binding

tracheal system development (sensu Insect; protein amino acid phosphorylation

negative regulation of transcription

outer kinetochore of condensed chromosorr chromatin binding

gametogenesis

response to DNA damage stimulus

negative regulation of cell proliferation

metal ion binding

DNA binding

negative regulation of transcription, DNA-de

ATP binding  
protein kinase activity

ephrin receptor activity

organ morphogenesis

ribonuclease H activity

5'-3' exonuclease activity

vesicle-mediated transport

glutathione metabolism

response to oxidative stress

generation of precursor metabolites and enç glucose transport

insulin-like growth factor binding

peptidase activity

sarcomere

zinc ion binding  
DNA replication origin binding  
ATPase activity  
cytosol  
transcription

nucleic acid binding  
cell cycle  
nucleotide binding  
nucleotide binding  
cell proliferation

cytosol  
transcription  
cell division  
chromatin binding  
ATP binding

nucleus

meiosis

cell division

nucleotide binding

centrosome

mammary gland development

integral to membrane

nucleus

porin activity

cysteine-type endopeptidase activity

protein metabolism

protein modification

ATP binding  
regulation of DNA replication

establishment and/or maintenance of cell pc cell septum

DNA binding

double-stranded DNA binding

3'-5' exonuclease activity

actin cytoskeleton

actin binding

pyrroline-5-carboxylate reductase activity

nucleotide binding

heteroduplex formation

DNA repair

nucleotide binding

protein export from nucleus

GTP binding



DNA ligase (NAD+) activity

telomere maintenance via telomerase

DNA binding  
nuclear chromatin  
DNA binding

Elg1 RFC-like complex  
S phase of mitotic cell cycle  
Elg1 RFC-like complex

nuclear chromatin  
nuclear chromatin

telomere maintenance

nucleolus organization and biogenesis  
DNA-directed RNA polymerase I complex

DNA replication factor A complex  
single-stranded DNA binding

DNA-directed RNA polymerase activity  
DNA replication factor A complex

superoxide metabolism

integral to membrane

nucleus

cation:chloride symporter activity

potassium ion binding

membrane fraction

STAT protein nuclear translocation

transcription factor activity

protein C-terminus binding

chromatin remodeling

transcription initiation

cellular component unknown

GTP binding

cysteine-type endopeptidase activity

chromosome condensation

cytoskeleton  
metal ion binding

membrane fraction  
cell projection biogenesis

neuromuscular junction development  
regulation of Rho protein signal transduction





DNA-(apurinic or apyrimidinic site) lyase act DNA binding

response to DNA damage stimulus

monovalent inorganic cation transport

magnesium ion binding

ion transport

protein kinase activity

chromosome, pericentric region

microtubule binding

chromosome

DNA binding

DNA synthesis during DNA repair

delta DNA polymerase complex

JAK-STAT cascade

signal transduction

cell cycle

mitotic spindle checkpoint

protein C-terminus binding

cell proliferation

protein kinase activity

replication fork

methyltransferase activity

replication fork

axon guidance

protein kinase activity

axon guidance receptor activity



endonuclease activity

phosphoinositide-mediated signaling

sphingolipid biosynthesis

hormone activity

endoplasmic reticulum

glucose metabolism

nucleotide binding  
ATP binding  
chromatin binding  
DNA replication  
DNA binding

chromatin binding  
DNA binding  
DNA replication  
DNA replication origin binding  
S phase of mitotic cell cycle

DNA replication  
S phase of mitotic cell cycle  
DNA replication origin binding  
transcription  
single-stranded DNA binding

nucleotide binding

centrosome

protein amino acid phosphorylation

nucleotide metabolism

regulation of apoptosis

soluble fraction

ubiquitin binding

protein targeting

SH2 domain binding

endoplasmic reticulum

synaptic transmission, glutamatergic

central nervous system development

phosphoenolpyruvate carboxykinase (GTP) manganese ion binding

carboxy-lyase activity

protein C (activated) activity

negative regulation of coagulation

peptidase activity

response to cadmium ion

DNA metabolism

ATP binding

protein import into nucleus

cell cycle

regulation of progression through cell cycle

S phase of mitotic cell cycle

S phase of mitotic cell cycle

condensed chromosome  
DNA-directed RNA polymerase activity

cytosol

fatty acid biosynthesis

signal transduction during conjugation with c

ion transport

sodium ion binding

apical plasma membrane

transcription initiation from RNA polymerase negative regulation of transcription from RN nucleotide kinase activity

plasma membrane

activation of NF-kappaB transcription factor protein homooligomerization

muscle contraction

positive regulation of cell adhesion







magnesium ion binding

3'-5' exonuclease activity

3'-5' exonuclease activity

replication fork

mitochondrion organization and biogenesis ATP binding

cell proliferation

chromatin

nuclear envelope

kinetochore assembly

regulation of neuronal synaptic plasticity

double-strand break repair

DNA binding

double-stranded DNA binding

negative regulation of vasodilation

positive regulation of cytokine secretion

acute-phase response

DNA replication origin binding

transcription  
cell cycle

cell cycle

ATP binding  
ATP binding

transcription

DNA binding  
DNA binding



regulation of progression through mitotic cell cycle

ATP binding

ATP binding

DNA binding

UTP biosynthesis

chromatin binding

regulation of Ras protein signal transduction thyroid hormone receptor binding

ligase activity

response to unfolded protein

startle response

extracellular region

DNA binding

response to DNA damage stimulus

recombinase activity

actin filament organization

exosome (RNase complex)

spindle organization and biogenesis

cytokinesis by cell plate formation

multidimensional cell growth

carrier activity

transcription

transcription factor TFIID complex

ATP binding

mitochondrion

G-protein signaling, coupled to IP3 second messenger release of cytoplasmic sequestered NF- $\kappa$ B









regulation of progression through cell cycle cyclin binding

blastoderm segmentation

metaphase plate congression



magnesium ion binding

damaged DNA binding

manganese ion binding



ATP binding

cell proliferation

DNA binding

regulation of progression through cell cycle  
nuclear chromatin

regulation of progression through cell cycle magnesium ion binding

magnesium ion binding

nuclear pore

receptor signaling complex scaffold activity structural constituent of nuclear pore

Golgi membrane

damaged DNA binding

condensed chromosome

endoplasmic reticulum

Rho guanyl-nucleotide exchange factor actin barrier septum



protein amino acid acetylation

DNA binding

chromatin

induction of apoptosis

protein domain specific binding

positive regulation of I-kappaB kinase/NF- $\kappa$ B



















positive regulation of I-kappaB kinase/NF-kappaB positive regulation of epidermal growth factor receptor signaling pathway



lipid biosynthesis

mating projection tip

site of polarized growth



positive regulation of inflammatory response  
isopeptide cross-linking via N6-(L-isoglutamyl)-L-lysine

























regulation of Rho protein signal transduction barrier septum formation

establishment and/or maintenance of cell pc



























guard mother cell cytokinesis

stearoyl-CoA 9-desaturase activity

guard cell differentiation

|                                              |               |                    |          |          |           |           |          |
|----------------------------------------------|---------------|--------------------|----------|----------|-----------|-----------|----------|
| nucleus                                      | GO:GO:0005634 | 1190002H;1700022LC | 2010012C | 2810417H | 6330416LC | Actl6a    | Anapc1   |
| protein binding                              | GO:GO:0005515 | 1190002H;Acta2     | Actl6a   | Anapc1   | Apex1     | Atrn      | Aurkb    |
| nucleotide binding                           | GO:GO:0000166 | Abce1              | Acta2    | Atp4a    | Aurka     | Aurkb     | B230120H |
| DNA binding                                  | GO:GO:0003677 | Apex1              | Aurkb    | Bclaf1   | Cdc6      | Cdkn2c    | Cdt1     |
| cytoplasm                                    | GO:GO:0005737 | 1190002H;Ada       | Aldh18a1 | Amd1     | Anp32e    | Apex1     | B230120H |
| membrane                                     | GO:GO:0016020 | 63305270;Abce1     | Acsl5    | Aldh18a1 | Aqp1      | Atp4a     | Atp6ap2  |
| ATP binding                                  | GO:GO:0005524 | Abce1              | Acta2    | Actl6a   | Atp4a     | Aurka     | Aurkb    |
| integral to membrane                         | GO:GO:0016021 | 63305270;A1132487  | Acsl5    | Aqp1     | Atp4a     | Atp6ap2   | Atrn     |
| metal ion binding                            | GO:GO:0046872 | 6330416LC          | AU021838 | Ada      | Apex1     | Apobec3   | Arfgap1  |
| cell cycle                                   | GO:GO:0007049 | 1190002H;Anapc1    | Aspm     | Aurka    | Aurkb     | B230120H  | Birc5    |
| transferase activity                         | GO:GO:0016740 | AU021838           | Aldh18a1 | Aurka    | Aurkb     | B230120H  | BC023814 |
| nucleic acid binding                         | GO:GO:0003676 | 1810003N;6330416LC | Bcl11a   | Brca2    | Cstf2     | Dbf4      | Ddx39    |
| cellular component unknown                   | GO:GO:0008372 | 5730507H;Aaas      | Abce1    | Acsm2    | Ada       | Amd1      | Apex1    |
| regulation of transcription, DNA-dependent   | GO:GO:0006355 | 6330416LC          | Actl6a   | Ada      | Bcl11a    | Bclaf1    | Cdkn2c   |
| transcription                                | GO:GO:0006350 | Actl6a             | Bcl11a   | Bclaf1   | Cebpz     | Cnot6     | Dnmt1    |
| extracellular space                          | GO:GO:0005615 | 2210407C           | Agr2     | Aqp1     | Atrn      | Brca2     | Ccl9     |
| biological process unknown                   | GO:GO:0000004 | 5730507H;Aaas      | Acsm2    | Acta2    | Anp32e    | Aspm      | Bxdc1    |
| zinc ion binding                             | GO:GO:0008270 | 6330416LC          | Apobec3  | Arfgap1  | BC027344  | Bcl11a    | Birc5    |
| transport                                    | GO:GO:0006810 | A1132487           | Abce1    | Ap3m1    | Api5      | Aqp1      | Arfgap1  |
| RNA binding                                  | GO:GO:0003723 | 1810003N;2810028N  | Cnot6    | Cpsf2    | Cstf2     | Dek       | Eif1a    |
| molecular function unknown                   | GO:GO:0005554 | 5730507H;Aaas      | Acsm2    | Aspm     | Bxdc1     | Bysl      | Ccdc5    |
| kinase activity                              | GO:GO:0016301 | AU021838           | Aldh18a1 | Aurka    | Aurkb     | B230120H  | Bub1b    |
| cell division                                | GO:GO:0051301 | Anapc1             | Aspm     | Aurkb    | Birc5     | Brrn1     | Bub1b    |
| DNA replication                              | GO:GO:0006260 | Cdc6               | Cdt1     | Dbf4     | Dnajc2    | Fen1      | Lig1     |
| hydrolase activity                           | GO:GO:0016787 | A1132487           | Ada      | Apobec3  | Atp4a     | Atp6ap2   | Blmh     |
| intracellular                                | GO:GO:0005622 | 6330416LC          | Bcl11a   | Birc5    | Cdc25b    | Ect2      | Gnl3     |
| mitosis                                      | GO:GO:0007067 | Anapc1             | Aspm     | Aurkb    | Birc5     | Brrn1     | Bub1b    |
| DNA repair                                   | GO:GO:0006281 | Ada                | Apex1    | Brca2    | Chek1     | Fancl     | Fancm    |
| cytosol                                      | GO:GO:0005829 | Ccnd1              | Cct3     | Cdo1     | Clns1a    | Cttnal1   | Gbp4     |
| regulation of progression through cell cycle | GO:GO:0000074 | Anapc1             | Brca2    | Ccna2    | Ccnb1     | Ccnb1-rs1 | Ccnb2    |
| receptor activity                            | GO:GO:0004872 | Amot               | Atp6ap2  | Atrn     | Cd44      | Ephb2     | Ephb3    |
| mitochondrion                                | GO:GO:0005739 | 2810417H;Abce1     | Acsl5    | Aldh18a1 | C1qbp     | Cdt1      | Hspd1    |
| protein amino acid phosphorylation           | GO:GO:0006468 | Aurka              | Aurkb    | B230120H | Bub1b     | Ccnb1     | Ccnd1    |
| protein serine/threonine kinase activity     | GO:GO:0004674 | Aurka              | Aurkb    | B230120H | Bub1b     | Cdc2a     | Cdc7     |
| endoplasmic reticulum                        | GO:GO:0005783 | Apex1              | Ckap4    | Dnajc10  | Fen1      | ligp1     | Ins1     |
| signal transduction                          | GO:GO:0007165 | Ccl9               | Cdk4     | Cxcl10   | Ffar2     | Fzd1      | Fzd7     |
| chromatin binding                            | GO:GO:0003682 | Actl6a             | Cbx5     | Cdc6     | Cenpf     | Hells     | Hmgb1    |



|                                        |               |          |          |                |         |          |        |         |
|----------------------------------------|---------------|----------|----------|----------------|---------|----------|--------|---------|
| protein kinase activity                | GO:GO:0004672 | Aurka    | Aurkb    | B230120H:Bub1b | Ccnd1   | Cdc2a    | Cdc7   |         |
| oxidoreductase activity                | GO:GO:0016491 | Aldh18a1 | Apex1    | Cdo1           | Fads1   | Fzd7     | Idh1   | Impdh2  |
| mRNA processing                        | GO:GO:0006397 | Cpsf2    | Cstf2    | Ddx39          | Dek     | Eftud2   | Gemin6 | Hnrpa1  |
| response to DNA damage stimulus        | GO:GO:0006974 | Apex1    | Brca2    | Chek1          | Chek2   | Fancl    | Fancm  | Lig1    |
| development                            | GO:GO:0007275 | Atrn     | Cenpf    | Diap2          | Fzd1    | Fzd7     | Grem1  | H1f0    |
| ribonucleoprotein complex              | GO:GO:0030529 | Eftud2   | Hnrpa1   | Hnrpab         | Hnrpd1  | Nhp211   | Nola1  | Nola2   |
| magnesium ion binding                  | GO:GO:0000287 | AU021838 | Acsl5    | Apex1          | Atp4a   | B230120H | Chek2  | Cnot6   |
| nucleolus                              | GO:GO:0005730 | Gnl3     | Mki67    | Mki67ip        | Ncl     | Nhp211   | Nol5   | Nol5a   |
| GTP binding                            | GO:GO:0005525 | Dek      | Eftud2   | Gbp2           | Gbp4    | Gnl3     | Gtpbp4 | ligp1   |
| integral to plasma membrane            | GO:GO:0005887 | Aqp1     | Atp4a    | Atrn           | Boc     | Elovl5   | Ephb2  | Ephb3   |
| DNA replication initiation             | GO:GO:0006270 | Ccne2    | Cdc7     | Cdt1           | Dbf4    | Mcm10    | Mcm2   | Mcm3    |
| cell proliferation                     | GO:GO:0008283 | Cdk4     | Cenpf    | E2f8           | Gkn1    | Gnl3     | Hdgf   | Kif2c   |
| plasma membrane                        | GO:GO:0005886 | Atrn     | C1qbp    | Clns1a         | Gjb2    | Gp1ba    | Itga6  | Nhp211  |
| protein transport                      | GO:GO:0015031 | Ap3m1    | Arfgap1  | Kpnb1          | Lman1   | Nras     | Nup107 | Nup37   |
| ligase activity                        | GO:GO:0016874 | Acsl5    | Asns     | Ctps           | Fancl   | Gart     | Lig1   | Nedd4   |
| protein-tyrosine kinase activity       | GO:GO:0004713 | Aurka    | Aurkb    | B230120H       | Cdc2a   | Chek1    | Chek2  | Ephb2   |
| immune response                        | GO:GO:0006955 | Ada      | C1qbp    | Ccl9           | Cxcl10  | Cxcl11   | Cxcl9  | Gbp2    |
| transcription factor activity          | GO:GO:0003700 | Cdkn2c   | Hod      | Hoxa11         | Hoxa9   | Neurog3  | Pa2g4  | Rrs1    |
| nuclear mRNA splicing, via spliceosome | GO:GO:0000398 | Ddx39    | Eftud2   | Gemin6         | Nhp211  | Nono     | Sfpq   | Sfrs2   |
| regulation of transcription            | GO:GO:0045449 | Brca2    | Gtf2h2   | Hod            | Hoxa11  | Hoxa9    | Id4    | Lin9    |
| extracellular region                   | GO:GO:0005576 | Ccl9     | Cxcl10   | Cxcl11         | Cxcl9   | Igfbp5   | Ins1   | Lrg1    |
| intracellular signaling cascade        | GO:GO:0007242 | Ect2     | Igfbp5   | Nek2           | Pck2    | Racgap1  | Scd1   | Snx10   |
| nucleoside-triphosphatase activity     | GO:GO:0017111 | Abce1    | Cdc6     | Mcm3           | Mcm5    | Mcm7     | Psmc6  | Rad51   |
| chromatin                              | GO:GO:0000785 | Asf1b    | Cbx5     | Cenpf          | Hmga2   | Hmgb1    | Hmgn1  | Kif22   |
| soluble fraction                       | GO:GO:0005625 | Asns     | Blmh     | Idh1           | Lgals2  | Mod1     | Nme1   | Pitpnm2 |
| ubiquitin cycle                        | GO:GO:0006512 | Anapc1   | Fancl    | Nedd4          | Park2   | Skp2     | Ube2c  | Uble1a  |
| protein folding                        | GO:GO:0006457 | Abce1    | C80913   | Cct3           | Dnajc10 | Dnajc2   | Dnajc9 | Fkbp3   |
| calcium ion binding                    | GO:GO:0005509 | Entpd4   | Itga6    | Lman1          | Nucb2   | Pitpnm2  | Proc   | Rcn1    |
| electron transport                     | GO:GO:0006118 | Abce1    | Cdo1     | Cxcl10         | Lats2   | Pitpnm2  | Pycr1  | Racgap1 |
| chromosome                             | GO:GO:0005694 | Aurkb    | Birc5    | H1f0           | H2afz   | Hmga2    | Hmgb1  | Rif1    |
| catalytic activity                     | GO:GO:0003824 | Acsl5    | Aldh18a1 | Atp4a          | Ctps    | Dnmt1    | Gart   | Impdh2  |
| nucleotidyltransferase activity        | GO:GO:0016779 | Pnpt1    | Pola1    | Pold3          | Pole    | Pole2    | Polr2a | Polr3f  |
| unfolded protein binding               | GO:GO:0051082 | Abce1    | Cct3     | Dnajc10        | Dnajc2  | Dnajc9   | Hspd1  | Hspe1   |
| GTPase activity                        | GO:GO:0003924 | Eftud2   | Gbp2     | Gbp4           | Igtp    | ligp1    | ligp2  | Nras    |
| S phase of mitotic cell cycle          | GO:GO:0000084 | Cdc6     | Cdt1     | Mcm2           | Mcm3    | Mcm5     | Mcm6   | Mcm7    |
| microtubule                            | GO:GO:0005874 | Ccdc5    | Cnn3     | Dynlt1         | Incenp  | Kif11    | Kif22  | Kif2c   |
| iron ion binding                       | GO:GO:0005506 | Abce1    | Cdo1     | Fads1          | Indo    | Polr3h   | Ppp3cb | Racgap1 |

|                                                                      |               |          |        |           |         |          |         |         |
|----------------------------------------------------------------------|---------------|----------|--------|-----------|---------|----------|---------|---------|
| protein biosynthesis                                                 | GO:GO:0006412 | Eftud2   | Eif1a  | Eif4e2    | Eif4g1  | Eif5a    | Nola2   | Rpl711  |
| transporter activity                                                 | GO:GO:0005215 | Aqp1     | Eif1a  | Mtm1      | Nup155  | Slc12a2  | Slc5a4b | Slco3a1 |
| electron carrier activity                                            | GO:GO:0009055 | Abce1    | Cdo1   | Cxcl10    | P4hb    | Phgdh    | Racgap1 | Trip6   |
| transcription regulator activity                                     | GO:GO:0030528 | Ada      | Apex1  | Bzw1      | Id4     | Lap3     | Neurog3 | Nup62   |
| binding                                                              | GO:GO:0005488 | Api5     | Aspm   | Cebpz     | Cep70   | Heatr1   | Kpnb1   | Narg1   |
| metabolism                                                           | GO:GO:0008152 | Acs15    | Asns   | Atp4a     | Fzd1    | Fzd7     | Galk1   | Idh1    |
| cytoskeleton                                                         | GO:GO:0005856 | Acta2    | Cct3   | Cdk5rap2  | Cttnal1 | Epb4.115 | Tpm3    | Tubb5   |
| carbohydrate metabolism                                              | GO:GO:0005975 | Galk1    | Idh1   | Ins1      | Pnpt1   | Pomt1    | Rpe     | Smpdl3b |
| rRNA processing                                                      | GO:GO:0006364 | Gas5     | Nme1   | Nol5      | Nol5a   | Nola1    | Nola2   | Pa2g4   |
| inflammatory response                                                | GO:GO:0006954 | Atrn     | Cdo1   | Cxcl10    | Cxcl11  | Cxcl9    | Pap     | Reg3g   |
| cell adhesion                                                        | GO:GO:0007155 | Boc      | Bysl   | Cd44      | Cttnal1 | Gp1ba    | Itga6   | Omd     |
| pre-replicative complex                                              | GO:GO:0005656 | Cdc6     | Cdt1   | Mcm10     | Mcm2    | Mcm3     | Mcm5    | Mcm6    |
| DNA-directed RNA polymerase activity                                 | GO:GO:0003899 | Polr2a   | Polr3f | Polr3h    | Prim1   | Rpa1     | Rpa2    | Rpo1-4  |
| apoptosis                                                            | GO:GO:0006915 | Api5     | Birc5  | Eif5a     | Grem1   | Moap1    | Siva    | Tfam    |
| DNA replication origin binding                                       | GO:GO:0003688 | Hnrpab   | Mcm2   | Mcm3      | Mcm5    | Mcm6     | Mcm7    | Orc2l   |
| DNA-dependent ATPase activity                                        | GO:GO:0008094 | Mcm2     | Mcm3   | Mcm5      | Mcm6    | Mcm7     | Rad51   | Rad54l  |
| cyclin-dependent protein kinase regulator activity                   | GO:GO:0016538 | Ccna2    | Ccnb1  | Ccnb1-rs1 | Ccnb2   | Ccnd1    | Ccne2   | Cks1b   |
| condensed chromosome                                                 | GO:GO:0000793 | Incenp   | Mki67  | Mki67ip   | Rad51   | Rpa1     | Tmpo    | Top2a   |
| chromosome, pericentric region                                       | GO:GO:0000775 | Aurkb    | Birc5  | Cenpf     | Incenp  | Mad2l1   | Mki67   | Sgol1   |
| negative regulation of transcription from RNA polymerase II promoter | GO:GO:0000122 | Dnmt1    | Hod    | Orc2l     | Strap   | Suz12    | Taf9    | Tdg     |
| spliceosome complex                                                  | GO:GO:0005681 | Api5     | Eftud2 | Gemin6    | Nhp211  | Sf3b3    | Sfrs2   | Snrpg   |
| nuclear pore                                                         | GO:GO:0005643 | Aaas     | Kpnb1  | Nup107    | Nup155  | Nup62    | Rangap1 | Xpo1    |
| peptidase activity                                                   | GO:GO:0008233 | A1132487 | Blmh   | Lap3      | Proc    | Psmc6    | Uchl5   | Usp1    |
| membrane fraction                                                    | GO:GO:0005624 | Gp1ba    | Kcnn4  | Mgat2     | Nras    | Ppap2a   | Slc12a2 | Utrn    |
| pre-replicative complex formation and maintenance                    | GO:GO:0006267 | Cdc6     | Mcm10  | Mcm2      | Mcm3    | Mcm5     | Mcm6    | Mcm7    |
| proteolysis                                                          | GO:GO:0006508 | Blmh     | Lap3   | Nedd4     | Park2   | Proc     | Tgm2    |         |
| negative regulation of cell proliferation                            | GO:GO:0008285 | Chek1    | Ifitm3 | Nme1      | Nup62   | Ppap2a   | Wars    |         |
| chemotaxis                                                           | GO:GO:0006935 | Abce1    | Amot   | Ccl9      | Cxcl10  | Cxcl11   | Utrn    |         |
| protein heterodimerization activity                                  | GO:GO:0046982 | Cenpf    | Pola1  | Ppp3cb    | Smc4l1  | Timeless | Uble1a  |         |
| protein modification                                                 | GO:GO:0006464 | Nedd4    | Park2  | Ube2c     | Uble1a  | Uble1b   | Wwp1    |         |
| organ morphogenesis                                                  | GO:GO:0009887 | Ephb2    | Gmnn   | Grem1     | Hoxa11  | Hoxa9    | Smarcc1 |         |
| positive regulation of cell proliferation                            | GO:GO:0008284 | Cxcl10   | Gkn1   | Id4       | Nap111  | Suz12    | Ube2c   |         |
| ion transport                                                        | GO:GO:0006811 | Atp4a    | Kcnk3  | Kcnn4     | Slc12a2 | Slc5a4b  | Slco3a1 |         |
| ribosome biogenesis                                                  | GO:GO:0007046 | Gtpbp4   | Nol5a  | Nola1     | Nola2   | Rps6     | Rrs1    |         |

|                                                      |               |          |        |           |          |          |          |
|------------------------------------------------------|---------------|----------|--------|-----------|----------|----------|----------|
| helicase activity                                    | GO:GO:0004386 | Ddx39    | Ercc6l | Fancm     | Hells    | Rad54l   | Smarcad1 |
| mRNA export from nucleus                             | GO:GO:0006406 | Ddx39    | Hnrpa1 | Nup107    | Rpa1     | Thoc3    | Xpo1     |
| ubiquitin-dependent protein catabolism               | GO:GO:0006511 | Park2    | Skp2   | Ube2c     | Uchl5    | Usp1     | Usp39    |
| calmodulin binding                                   | GO:GO:0005516 | Aspm     | Cnn1   | Cnn3      | Itpka    | Kcnn4    | Ppp3cb   |
| methyltransferase activity                           | GO:GO:0008168 | BC023814 | Dnmt1  | Pnmt      | Rg9mtd2  | Shmt1    | Shmt2    |
| cytokine activity                                    | GO:GO:0005125 | Ccl9     | Cxcl10 | Cxcl11    | Cxcl9    | Grem1    | Retnlb   |
| translation initiation factor activity               | GO:GO:0003743 | Bzw1     | Eif1a  | Eif4e2    | Eif4ebp2 | Eif4g1   | Eif5a    |
| small GTPase mediated signal transduction            | GO:GO:0007264 | Gtpbp4   | Lrg1   | Nras      | Ran      | Rem2     | Vav3     |
| actin binding                                        | GO:GO:0003779 | Cnn1     | Cnn3   | Diap2     | Proc     | Tpm3     | Utrn     |
| DNA recombination                                    | GO:GO:0006310 | Brca2    | Lig1   | Nono      | Rad51    | Rad51ap1 | Rpa1     |
| single-stranded DNA binding                          | GO:GO:0003697 | Brca2    | Hnrpa1 | Mcm6      | Mcm7     | Rpa1     | Rpa2     |
| kinetochore                                          | GO:GO:0000776 | Bub1b    | Cbx5   | Cenpf     | Cnn1     | Kif22    | Mad2l1   |
| cell-cell signaling                                  | GO:GO:0007267 | Ccl9     | Fzd1   | Gjb2      | Grem1    | Hmmr     | Ins1     |
| amino acid biosynthesis                              | GO:GO:0008652 | Aldh18a1 | Asns   | Phgdh     | Psat1    | Pycr1    |          |
| regulation of cell growth                            | GO:GO:0001558 | Actl6a   | Cdk4   | Hrasls    | Igfbp5   | Socs3    |          |
| ribosome                                             | GO:GO:0005840 | Apex1    | Eif1a  | Nola2     | Rpl7l1   | Rps6     |          |
| nucleosome assembly                                  | GO:GO:0006334 | Asf1b    | H2afz  | Mcm2      | Nap111   | Set      |          |
| transcription factor complex                         | GO:GO:0005667 | Cdk4     | Hoxa11 | Hoxa9     | Tcf19    | Tfam     |          |
| cell surface receptor linked signal transduction     | GO:GO:0007166 | Fzd1     | Fzd7   | Ins1      | Nup62    | Tnfrsf1b |          |
| isomerase activity                                   | GO:GO:0016853 | Fkbp3    | P4hb   | Rpe       | Top2a    | Txnkc5   |          |
| G-protein coupled receptor protein signaling pathway | GO:GO:0007186 | Ffar2    | Fzd1   | Fzd7      | Lgr5     | Olfrl157 |          |
| ATP-dependent helicase activity                      | GO:GO:0008026 | Ddx39    | Fancm  | Hells     | Rad54l   | Smarcad1 |          |
| nucleocytoplasmic transport                          | GO:GO:0006913 | Aaas     | Nup107 | Nup155    | Nup62    | Ran      |          |
| cytokinesis                                          | GO:GO:0000910 | Aurkb    | Ccnb1  | Ccnb1-rs1 | Prc1     | Ube2c    |          |
| nuclease activity                                    | GO:GO:0004518 | Apex1    | Cnot6  | Fancm     | Fen1     | Rexo2    |          |
| porin activity                                       | GO:GO:0015288 | Aqp1     | Nup107 | Nup155    | Nup37    | Nup62    |          |
| cysteine-type endopeptidase activity                 | GO:GO:0004197 | Blmh     | Park2  | Tgm2      | Usp1     | Usp39    |          |
| small nucleolar ribonucleoprotein complex            | GO:GO:0005732 | Nol5     | Nola1  | Rps6      | Snrpd3   | Snrpg    |          |
| sugar binding                                        | GO:GO:0005529 | Atrn     | Lgals2 | Lman1     | Pap      | Reg3g    |          |
| ubiquitin-protein ligase activity                    | GO:GO:0004842 | Fancl    | Nedd4  | Park2     | Ube2c    | Wwp1     |          |
| chromatin modification                               | GO:GO:0016568 | Actl6a   | Rbbp4  | Smarcc1   | Suz12    | Taf9     |          |
| outer membrane                                       | GO:GO:0019867 | Aqp1     | Nup107 | Nup155    | Nup37    | Nup62    |          |
| DNA-directed DNA polymerase activity                 | GO:GO:0003887 | Cdc6     | Pola1  | Pold3     | Pole     | Pole2    |          |
| MCM complex                                          | GO:GO:0042555 | Mcm2     | Mcm3   | Mcm5      | Mcm6     | Mcm7     |          |

|                                                          |               |           |          |         |          |         |
|----------------------------------------------------------|---------------|-----------|----------|---------|----------|---------|
| DNA helicase activity                                    | GO:GO:0003678 | Mcm2      | Mcm3     | Mcm5    | Mcm6     | Mcm7    |
| protein amino acid dephosphorylation                     | GO:GO:0006470 | Cdc25b    | Mtm1     | Ppap2a  | Ppp3cb   | Ptpro   |
| 3'-5' exonuclease activity                               | GO:GO:0008408 | Apex1     | Cdc6     | Pola1   | Pole     | Rexo2   |
| DNA unwinding during replication                         | GO:GO:0006268 | Mcm2      | Mcm3     | Mcm6    | Mcm7     | Top2a   |
| structural molecule activity                             | GO:GO:0005198 | Acta2     | Cldn2    | Ctnnal1 | Tubb5    | Utrn    |
| GTPase activator activity                                | GO:GO:0005096 | Arfgap1   | Ect2     | Racgap1 | Rangap1  | Scd1    |
| meiosis                                                  | GO:GO:0007126 | Kif2c     | Mki67    | Nek2    | Rad51    | Rpa1    |
| protein complex                                          | GO:GO:0043234 | Psmc6     | Rfc4     | Rfc5    | Tubb5    | Uchl5   |
| regulation of translation                                | GO:GO:0006445 | Eif4e2    | Eif4ebp2 | Eif4g1  | Pa2g4    | Rps6    |
| Golgi stack                                              | GO:GO:0005795 | Ap3m1     | Arfgap1  | Lman1   | Mgat2    | Nras    |
| nuclear envelope                                         | GO:GO:0005635 | Cenpf     | Fanc1    | Rangap1 | Tmpo     | Xpo1    |
| exonuclease activity                                     | GO:GO:0004527 | 2810028N  | Cnot6    | Fen1    | Isg2011  | Rexo2   |
| signal transducer activity                               | GO:GO:0004871 | Ffar2     | Fzd1     | Fzd7    | Lgr5     | Stat1   |
| RNA splicing                                             | GO:GO:0008380 | Eftud2    | Sf3b3    | Sfpq    | Sfrs2    | Syncrip |
| spindle                                                  | GO:GO:0005819 | Aurkb     | Cdc6     | Kif22   | Prc1     | Scd1    |
| DNA replication factor C complex                         | GO:GO:0005663 | Pcna      | Recc1    | Rfc2    | Rfc4     | Rfc5    |
| chromosome segregation                                   | GO:GO:0007059 | Cnn1      | Sgol1    | Smc411  | Top2a    |         |
| replication fork                                         | GO:GO:0005657 | Cdc6      | Chek1    | Dnmt1   | Pcna     |         |
| negative regulation of transcription                     | GO:GO:0016481 | Bclaf1    | Cenpf    | Id4     | Timeless |         |
| chromatin remodeling                                     | GO:GO:0006338 | Actl6a    | Brca2    | Rbbp4   | Taf9     |         |
| microtubule binding                                      | GO:GO:0008017 | Birc5     | Cnn3     | Incenp  | Nusap1   |         |
| cellular physiological process                           | GO:GO:0050875 | Ect2      | Hdgf     | Nras    | Ran      |         |
| microtubule-based process                                | GO:GO:0007017 | Dynlt1    | Kif11    | Kif22   | Tubb5    |         |
| nervous system development                               | GO:GO:0007399 | Grem1     | Hmgb1    | Neurog3 | Ptpro    |         |
| transcription factor binding                             | GO:GO:0008134 | Cenpf     | Dnmt1    | Tdg     | Uble1b   |         |
| DNA-dependent DNA replication                            | GO:GO:0006261 | Pole2     | Recc1    | Rpa1    | Rpa2     |         |
| protein targeting                                        | GO:GO:0006605 | Ccnb1-rs1 | Neto1    | Nup62   | Ran      |         |
| defense response                                         | GO:GO:0006952 | H2-T22    | Indo     | Irgm    | Kcnn4    |         |
| chemokine activity                                       | GO:GO:0008009 | Ccl9      | Cxcl10   | Cxcl11  | Cxcl9    |         |
| condensed nuclear chromosome                             | GO:GO:0000794 | Chek1     | Nek2     | Rad51   | Topbp1   |         |
| midbody                                                  | GO:GO:0030496 | Aurkb     | Birc5    | Incenp  | Nek2     |         |
| cell differentiation                                     | GO:GO:0030154 | Diap2     | Narg1    | Neurog3 | Zipro1   |         |
| cytoskeleton organization and biogenesis                 | GO:GO:0007010 | Acta2     | B230120H | Cct3    | Hmmr     |         |
| RNA processing                                           | GO:GO:0006396 | Hnrpa1    | Hnrpab   | Pnpt1   | Rbmxt    |         |
| ER-Golgi intermediate compartment                        | GO:GO:0005793 | Lman1     | Nucb2    | P4hb    | Tmed5    |         |
| chromosome organization and biogenesis (sensu Eukaryota) | GO:GO:0007001 | H2afz     | Hmga2    | Smc411  | Terf1    |         |

|                                                |               |          |          |         |         |
|------------------------------------------------|---------------|----------|----------|---------|---------|
| centrosome                                     | GO:GO:0005813 | Cct3     | Nek2     | Nme1    | Tacc3   |
| potassium ion binding                          | GO:GO:0030955 | Atp4a    | Impdh2   | Kcnk3   | Slc12a2 |
| nucleoplasm                                    | GO:GO:0005654 | Cdc7     | Dbf4     | Nolc1   | Xpo1    |
| axon guidance                                  | GO:GO:0007411 | Boc      | Ephb2    | Ephb3   | Nedd4   |
| lyase activity                                 | GO:GO:0016829 | Amd1     | Apex1    | Car12   | Pck2    |
| one-carbon compound metabolism                 | GO:GO:0006730 | Car12    | Car8     | Mthfd2  | Shmt1   |
| chromosome condensation                        | GO:GO:0030261 | Mcm10    | Mcm2     | Mcm5    | Top2a   |
| DNA metabolism                                 | GO:GO:0006259 | Ada      | Fancm    | Rad51   | Top2a   |
| DNA clamp loader activity                      | GO:GO:0003689 | Cdc6     | Rfc2     | Rfc4    | Rfc5    |
| transcriptional repressor activity             | GO:GO:0016564 | Bclaf1   | Dnmt1    | Hod     | Tdg     |
| intracellular protein transport                | GO:GO:0006886 | Ap3m1    | Ran      | Sec23b  | Snx6    |
| sequence-specific DNA binding                  | GO:GO:0043565 | Hod      | Hoxa11   | Hoxa9   | Spdef   |
| protein domain specific binding                | GO:GO:0019904 | Dnmt1    | Proc     | Tdg     | Tgm2    |
| ATPase activity                                | GO:GO:0016887 | Abce1    | Cdc6     | Mcm5    | Rfc5    |
| plastid                                        | GO:GO:0009536 | Abce1    | Pola1    | Rpa2    | Rpe     |
| G-protein coupled receptor activity            | GO:GO:0004930 | Ffar2    | Fzd1     | Fzd7    | Lgr5    |
| motor activity                                 | GO:GO:0003774 | Dynlt1   | Kif11    | Kif22   | Kif2c   |
| manganese ion binding                          | GO:GO:0030145 | Fen1     | Lap3     | Pck2    | Rexo2   |
| nuclear chromatin                              | GO:GO:0000790 | Mcm6     | Rfc2     | Rfc4    | Rfc5    |
| transcription from RNA polymerase II promoter  | GO:GO:0006366 | Polr2a   | Stat1    | Taf9    | Trip13  |
| potassium ion transport                        | GO:GO:0006813 | Atp4a    | Kcnk3    | Kcnn4   | Slc12a2 |
| regulation of protein biosynthesis             | GO:GO:0006417 | Eif4e2   | Eif4ebp2 | Eif4g1  | Pa2g4   |
| protein kinase binding                         | GO:GO:0019901 | Cdk5rap2 | Prkrip1  | Statip1 | Tpx2    |
| mitochondrial inner membrane                   | GO:GO:0005743 | Acsl5    | Hspd1    | Mtm1    | Shmt2   |
| leading strand elongation                      | GO:GO:0006272 | Pcna     | Rfc2     | Rfc4    | Rfc5    |
| anti-apoptosis                                 | GO:GO:0006916 | Api5     | Birc5    | Hells   | Socs3   |
| hormone activity                               | GO:GO:0005179 | Ins1     | Retnlb   | Tmpo    | Vip     |
| mismatch repair                                | GO:GO:0006298 | Pold3    | Rfc2     | Rfc4    | Rfc5    |
| sister chromatid cohesion                      | GO:GO:0007062 | Rfc2     | Rfc4     | Rfc5    |         |
| cysteine-type peptidase activity               | GO:GO:0008234 | Blmh     | Lap3     | Uchl5   |         |
| G2/M transition of mitotic cell cycle          | GO:GO:0000086 | Birc5    | Ccnb1    | Chek1   |         |
| microsome                                      | GO:GO:0005792 | Nme1     | P4hb     | Scd1    |         |
| Rho guanyl-nucleotide exchange factor activity | GO:GO:0005089 | Ect2     | Scd1     | Vav3    |         |
| embryonic development (sensu Mammalia)         | GO:GO:0001701 | Amd1     | Amot     | Tfam    |         |
| spindle microtubule                            | GO:GO:0005876 | Birc5    | Nusap1   | Tpx2    |         |

|                                                    |               |         |         |           |
|----------------------------------------------------|---------------|---------|---------|-----------|
| G1/S transition of mitotic cell cycle              | GO:GO:0000082 | Ccnd1   | Cdk4    | Skp2      |
| Elg1 RFC-like complex                              | GO:GO:0031391 | Rfc2    | Rfc4    | Rfc5      |
| cell death                                         | GO:GO:0008219 | Ins1    | Nup62   | Tnfrsf1b  |
| receptor binding                                   | GO:GO:0005102 | Ephb2   | Proc    | Strap     |
| negative regulation of apoptosis                   | GO:GO:0043066 | Mcm5    | Nup62   | Proc      |
| purine nucleotide binding                          | GO:GO:0017076 | Pola1   | Rfc2    | Rfc4      |
| mitotic chromosome condensation                    | GO:GO:0007076 | Brrn1   | Nusap1  | Smc411    |
| perinuclear region                                 | GO:GO:0048471 | Apex1   | Rangap1 | Sec23b    |
| regulation of Rho protein signal transduction      | GO:GO:0035023 | Ect2    | Scd1    | Vav3      |
| protein C-terminus binding                         | GO:GO:0008022 | Cenpf   | Taf9    | Uble1a    |
| regulation of S phase of mitotic cell cycle        | GO:GO:0007090 | Brca2   | Cdt1    | Dbf4      |
| rhodopsin-like receptor activity                   | GO:GO:0001584 | Ffar2   | Lgr5    | Olf157    |
| response to unfolded protein                       | GO:GO:0006986 | Hspd1   | Hspe1   | Park2     |
| protein kinase inhibitor activity                  | GO:GO:0004860 | Prkrip1 | Socs3   | Wnk1      |
| regulation of apoptosis                            | GO:GO:0042981 | Hspd1   | Moap1   | Nme1      |
| Rad17 RFC-like complex                             | GO:GO:0031389 | Rfc2    | Rfc4    | Rfc5      |
| tissue regeneration                                | GO:GO:0042246 | Ccnb1   | Hspd1   | Serpina10 |
| structural constituent of ribosome                 | GO:GO:0003735 | Nola2   | Rpl711  | Rps6      |
| Ctf18 RFC-like complex                             | GO:GO:0031390 | Rfc2    | Rfc4    | Rfc5      |
| mitotic cell cycle                                 | GO:GO:0000278 | Aurka   | Brrn1   | Mcm5      |
| external side of plasma membrane                   | GO:GO:0009897 | Amot    | Cd24a   | Cd44      |
| structural constituent of cytoskeleton             | GO:GO:0005200 | Acta2   | Actl6a  | Tubb5     |
| ATP-dependent DNA helicase activity                | GO:GO:0004003 | Mcm2    | Mcm3    | Mcm6      |
| JAK-STAT cascade                                   | GO:GO:0007259 | Cdk4    | Socs3   | Stat1     |
| diacylglycerol binding                             | GO:GO:0019992 | Pck2    | Racgap1 | Vav3      |
| cell growth                                        | GO:GO:0016049 | Cdk4    | Gkn1    | Nol5      |
| microtubule motor activity                         | GO:GO:0003777 | Kif11   | Kif22   | Kif2c     |
| transferase activity, transferring glycosyl groups | GO:GO:0016757 | Mgat2   | Mtap    | Pomt1     |
| microtubule-based movement                         | GO:GO:0007018 | Kif11   | Kif2c   | Tubb5     |
| kinesin complex                                    | GO:GO:0005871 | Kif11   | Kif22   | Kif2c     |
| meiotic recombination                              | GO:GO:0007131 | Chek1   | Rad51   | Topbp1    |
| muscle development                                 | GO:GO:0007517 | Cxcl10  | Mtm1    | Utrn      |
| phosphoinositide-mediated signaling                | GO:GO:0048015 | Car8    | Fen1    | Pcna      |
| DNA packaging                                      | GO:GO:0006323 | Hmga2   | Hmgb1   | Smarcc1   |
| phosphoprotein phosphatase activity                | GO:GO:0004721 | Cdc25b  | Mtm1    | Ppp3cb    |

|                                                                |               |          |          |          |
|----------------------------------------------------------------|---------------|----------|----------|----------|
| protein import into nucleus                                    | GO:GO:0006606 | Kpnb1    | Ran      | Rangap1  |
| cytoplasmic membrane-bound vesicle                             | GO:GO:0016023 | Anp32e   | Ifitm3   | Rpe      |
| mitochondrial matrix                                           | GO:GO:0005759 | C1qbp    | Hspe1    | Idh1     |
| ubiquitin ligase complex                                       | GO:GO:0000151 | Nedd4    | Skp2     | Wwp1     |
| protein tyrosine phosphatase activity                          | GO:GO:0004725 | Cdc25b   | Mtm1     | Ptpro    |
| transcription corepressor activity                             | GO:GO:0003714 | Bcl11a   | Id4      | Sfrs2    |
| regulation of translational initiation                         | GO:GO:0006446 | Bzw1     | Eif4ebp2 | Eif4g1   |
| DNA-directed RNA polymerase I complex                          | GO:GO:0005736 | Rpa1     | Rpa2     | Rpo1-4   |
| telomere maintenance via telomerase                            | GO:GO:0007004 | Recc1    | Rif1     | Terf1    |
| cellular morphogenesis                                         | GO:GO:0000902 | Gp1ba    | Hmgb1    | Scd1     |
| microtubule cytoskeleton organization and biogenesis           | GO:GO:0000226 | Birc5    | Ran      | Scd1     |
| actin filament                                                 | GO:GO:0005884 | Acta2    | Actl6a   | Cnn3     |
| Golgi apparatus                                                | GO:GO:0005794 | Dynlt1   | Lman1    | Mgat2    |
| DNA methylation                                                | GO:GO:0006306 | Aurkb    | Dnmt1    | Hells    |
| proline biosynthesis                                           | GO:GO:0006561 | Aldh18a1 | Proc     | Pycr1    |
| growth factor activity                                         | GO:GO:0008083 | Gkn1     | Hdgf     | Mia1     |
| secretory granule                                              | GO:GO:0030141 | Brca2    | Gkn1     | Sypl     |
| acute-phase response                                           | GO:GO:0006953 | Ins1     | Pap      | Reg3g    |
| protein homodimerization activity                              | GO:GO:0042803 | Cenpf    | E2f8     | Timeless |
| extracellular matrix (sensu Metazoa)                           | GO:GO:0005578 | Gp1ba    | Lgr5     | Omd      |
| ribosome biogenesis and assembly                               | GO:GO:0042254 | Nhp2l1   | Nola2    | Rrs1     |
| cyclin-dependent protein kinase holoenzyme complex             | GO:GO:0000307 | Ccnd1    | Cdk4     | Pcna     |
| nucleobase, nucleoside, nucleotide and nucleic acid metabolism | GO:GO:0006139 | Mtap     | Rexo2    | Tk1      |
| base-excision repair                                           | GO:GO:0006284 | Apex1    | Rpa2     | Tdg      |
| Golgi membrane                                                 | GO:GO:0000139 | Arfgap1  | Lman1    | Park2    |
| negative regulation of transcription, DNA-dependent            | GO:GO:0045892 | Dnmt1    | Hnrpab   | Pa2g4    |
| transcriptional activator activity                             | GO:GO:0016563 | Brca2    | Hoxa9    | Zipro1   |
| endoplasmic reticulum membrane                                 | GO:GO:0005789 | Fen1     | Lman1    | Pomt1    |
| chromatin assembly or disassembly                              | GO:GO:0006333 | Cbx5     | Hmgb1    | Smarcc1  |
| ubiquitin thiolesterase activity                               | GO:GO:0004221 | Uchl5    | Usp1     | Usp39    |
| protein transporter activity                                   | GO:GO:0008565 | Kpnb1    | Snx6     | Xpo1     |
| mitotic sister chromatid segregation                           | GO:GO:0000070 | Mad2l1   | Nek2     | Nusap1   |
| regulation of cell proliferation                               | GO:GO:0042127 | Cdk4     | Fancl    | Gnl3     |

|                                                                                                                               |               |          |          |         |
|-------------------------------------------------------------------------------------------------------------------------------|---------------|----------|----------|---------|
| protein ubiquitination                                                                                                        | GO:GO:0016567 | Nedd4    | Uble1a   | Wwp1    |
| basolateral plasma membrane                                                                                                   | GO:GO:0016323 | Aqp1     | Itga6    | Slc12a2 |
| phosphatase inhibitor activity                                                                                                | GO:GO:0019212 | Anp32e   | Ppp1r14b | Set     |
| mRNA metabolism                                                                                                               | GO:GO:0016071 | Hnrpd1   | Snrpd3   | Snrpg   |
| nucleotide metabolism                                                                                                         | GO:GO:0009117 | Ada      | Nme1     | Rexo2   |
| establishment and/or maintenance of chromatin architecture                                                                    | GO:GO:0006325 | Brca2    | Hmgn1    | Taf9    |
| telomere maintenance                                                                                                          | GO:GO:0000723 | Gbp2     | Rif1     | Terf1   |
| nucleocytoplasmic transporter activity                                                                                        | GO:GO:0005487 | Nup107   | Nup155   | Nup62   |
| ER to Golgi vesicle-mediated transport                                                                                        | GO:GO:0006888 | Arfgap1  | Lman1    | Sec23b  |
| translational initiation                                                                                                      | GO:GO:0006413 | Eif1a    | Eif4e2   | Eif5a   |
| regulation of DNA replication                                                                                                 | GO:GO:0006275 | Cdc7     | Dbf4     | Pcna    |
| amino acid metabolism                                                                                                         | GO:GO:0006520 | Asns     | Proc     |         |
| symporter activity                                                                                                            | GO:GO:0015293 | Slc12a2  | Slc1a4   |         |
| fatty acid elongation                                                                                                         | GO:GO:0030497 | Elov15   | Fen1     |         |
| cell cycle checkpoint                                                                                                         | GO:GO:0000075 | Chek1    | Rfc2     |         |
| aminopeptidase activity                                                                                                       | GO:GO:0004177 | Blmh     | Lap3     |         |
| antimicrobial humoral response (sensu Vertebrata)                                                                             | GO:GO:0019735 | Ada      | Ccl9     |         |
| lipid binding                                                                                                                 | GO:GO:0008289 | Ffar2    | Pitpnm2  |         |
| oxidoreductase activity, acting on the CH-OH group of donors, NAD or NADP as acceptor                                         | GO:GO:0016616 | Mod1     | Phgdh    |         |
| glutamine metabolism                                                                                                          | GO:GO:0006541 | Asns     | Ctps     |         |
| nuclear chromosome                                                                                                            | GO:GO:0000228 | Hmga2    | Rad51    |         |
| heat shock protein binding                                                                                                    | GO:GO:0031072 | Dnajc2   | Dnajc9   |         |
| histone phosphorylation                                                                                                       | GO:GO:0016572 | Incenp   | Tgm2     |         |
| hemopoiesis                                                                                                                   | GO:GO:0030097 | Bcl11a   | Tacc3    |         |
| identical protein binding                                                                                                     | GO:GO:0042802 | ligp1    | Trip13   |         |
| response to biotic stimulus                                                                                                   | GO:GO:0009607 | Ifitm2   | Ifitm3   |         |
| non-G-protein coupled 7TM receptor activity                                                                                   | GO:GO:0004926 | Fzd1     | Fzd7     |         |
| oxidoreductase activity, acting on single donors with incorporation of molecular oxygen, incorporation of two atoms of oxygen | GO:GO:0016702 | Cdo1     | Indo     |         |
| brain development                                                                                                             | GO:GO:0007420 | Cdk5rap2 | Phgdh    |         |



|                                                             |               |          |         |
|-------------------------------------------------------------|---------------|----------|---------|
| smooth muscle contraction                                   | GO:GO:0006939 | Cnn1     | Cnn3    |
| sodium ion transport                                        | GO:GO:0006814 | Slc12a2  | Slc5a4b |
| protein export from nucleus                                 | GO:GO:0006611 | Ran      | Xpo1    |
| generation of precursor metabolites and energy              | GO:GO:0006091 | Ins1     | Rpe     |
| mRNA polyadenylation                                        | GO:GO:0006378 | Cpsf2    | Cstf2   |
| heart development                                           | GO:GO:0007507 | Hod      | Ppp3cb  |
| purine nucleotide biosynthesis                              | GO:GO:0006164 | Gart     | Impdh2  |
| ribose phosphate diphosphokinase activity                   | GO:GO:0004749 | AU021838 | Prps2   |
| guanyl-nucleotide exchange factor activity                  | GO:GO:0005085 | Ect2     | Vav3    |
| carbonate dehydratase activity                              | GO:GO:0004089 | Car12    | Car8    |
| small nuclear ribonucleoprotein complex                     | GO:GO:0030532 | Nolc1    | Sf3b3   |
| metaphase plate congression                                 | GO:GO:0051310 | Cenpf    | Incenp  |
| positive regulation of apoptosis                            | GO:GO:0043065 | Bclaf1   | Siva    |
| L-serine metabolism                                         | GO:GO:0006563 | Shmt1    | Shmt2   |
| glycine hydroxymethyltransferase activity                   | GO:GO:0004372 | Shmt1    | Shmt2   |
| RNA splicing factor activity, transesterification mechanism | GO:GO:0031202 | Sf3b3    | Snrpg   |
| GPI anchor binding                                          | GO:GO:0048503 | Cd24a    | Gpiap1  |
| nuclear origin of replication recognition complex           | GO:GO:0005664 | Mcm2     | Orc2l   |
| cellular protein metabolism                                 | GO:GO:0044267 | Cct3     | Hspd1   |
| circadian rhythm                                            | GO:GO:0007623 | Timeless | Wnk1    |
| chloride transport                                          | GO:GO:0006821 | Clns1a   | Slc12a2 |
| pyridoxal phosphate binding                                 | GO:GO:0030170 | Shmt1    | Shmt2   |
| protein serine/threonine phosphatase activity               | GO:GO:0004722 | Mtm1     | Ppp3cb  |
| cell tip                                                    | GO:GO:0051286 | Pck2     | Scd1    |
| phospholipid binding                                        | GO:GO:0005543 | Pitpnm2  | Proc    |
| DNA strand elongation                                       | GO:GO:0006271 | Cdc6     | Mcm10   |
| pattern specification                                       | GO:GO:0007389 | Hoxa11   | Hoxa9   |
| tricarboxylic acid cycle                                    | GO:GO:0006099 | Idh1     | Polr3h  |
| alpha DNA polymerase:primase complex                        | GO:GO:0005658 | Pola1    | Prim1   |
| mitotic spindle assembly                                    | GO:GO:0051227 | Tpx2     | Tubb5   |
| insulin-like growth factor binding                          | GO:GO:0005520 | Igfbp5   | Ins1    |
| ubiquitin activating enzyme activity                        | GO:GO:0004839 | Uble1a   | Uble1b  |

|                                                                  |               |          |          |
|------------------------------------------------------------------|---------------|----------|----------|
| protein phosphatase type 2A regulator activity                   | GO:GO:0008601 | Ppp2r2b  | Rcn1     |
| ribonuclease activity                                            | GO:GO:0004540 | 2810028N | Rpp14    |
| mitochondrion organization and biogenesis                        | GO:GO:0007005 | Cdk4     | Tfam     |
| histone acetylation                                              | GO:GO:0016573 | Taf9     | Tgm2     |
| G2 phase of mitotic cell cycle                                   | GO:GO:0000085 | Cenpf    | Dnajc2   |
| blood coagulation                                                | GO:GO:0007596 | Lman1    | Proc     |
| cell motility                                                    | GO:GO:0006928 | Cxcl10   | Hmmr     |
| heme binding                                                     | GO:GO:0020037 | Indo     | Trip6    |
| pyrroline-5-carboxylate reductase activity                       | GO:GO:0004735 | Proc     | Pycr1    |
| nucleotide biosynthesis                                          | GO:GO:0009165 | AU021838 | Prps2    |
| transmembrane receptor protein tyrosine kinase signaling pathway | GO:GO:0007169 | Ephb2    | Ephb3    |
| microtubule associated complex                                   | GO:GO:0005875 | Kif11    | Kif2c    |
| transmembrane-ephrin receptor activity                           | GO:GO:0005005 | Ephb2    | Ephb3    |
| actin cytoskeleton organization and biogenesis                   | GO:GO:0030036 | Cnn1     | Diap2    |
| negative regulation of inflammatory response                     | GO:GO:0050728 | Proc     | Tnfrsf1b |
| chromosome, telomeric region                                     | GO:GO:0000781 | Rif1     | Terf1    |
| vesicle-mediated transport                                       | GO:GO:0016192 | Fen1     | Sypl     |
| DNA replication, synthesis of RNA primer                         | GO:GO:0006269 | Pola1    | Prim1    |
| receptor signaling protein serine/threonine kinase activity      | GO:GO:0004702 | Cdk4     | Nek2     |
| response to drug                                                 | GO:GO:0042493 | Blmh     | Cenpf    |
| nucleolus organization and biogenesis                            | GO:GO:0007000 | Nolc1    | Rpa1     |
| serine-type endopeptidase activity                               | GO:GO:0004252 | A1132487 | Proc     |
| regulation of transcription from RNA polymerase II promoter      | GO:GO:0006357 | Id4      | Tfam     |
| Ras protein signal transduction                                  | GO:GO:0007265 | Hrasls   | Nras     |
| structural constituent of nuclear pore                           | GO:GO:0017056 | Nup155   | Nup62    |
| DNA synthesis during DNA repair                                  | GO:GO:0000731 | Cdc6     | Pold3    |
| spindle pole                                                     | GO:GO:0000922 | Cenpf    | Nek2     |
| ion channel activity                                             | GO:GO:0005216 | Kcnk3    | Kcnn4    |
| S-adenosylmethionine-dependent methyltransferase activity        | GO:GO:0008757 | Dnmt1    | Pnmt     |
| phosphoinositide binding                                         | GO:GO:0035091 | Snx10    | Snx6     |

|                                                          |               |         |         |
|----------------------------------------------------------|---------------|---------|---------|
| calcium ion homeostasis                                  | GO:GO:0006874 | Ccl9    | Nucb2   |
| endonuclease activity                                    | GO:GO:0004519 | Apex1   | Fen1    |
| axon guidance receptor activity                          | GO:GO:0008046 | Ephb2   | Ephb3   |
| oogenesis                                                | GO:GO:0048477 | Diap2   | Zipro1  |
| regulation of cell shape                                 | GO:GO:0008360 | Pck2    | Ran     |
| protein phosphatase type 2A complex                      | GO:GO:0000159 | Ppp2r2b | Rcn1    |
| NAD binding                                              | GO:GO:0051287 | Mod1    | Phgdh   |
| synapse                                                  | GO:GO:0045202 | Syt9    | Utrn    |
| DNA damage checkpoint                                    | GO:GO:0000077 | Chek1   | Chek2   |
| Wnt receptor signaling pathway                           | GO:GO:0016055 | Fzd1    | Fzd7    |
| heparin binding                                          | GO:GO:0008201 | Hdgf    | Hmgb1   |
| learning                                                 | GO:GO:0007612 | Ephb2   | Park2   |
| spindle pole body                                        | GO:GO:0005816 | Cdc7    | Mad2l1  |
| glycine metabolism                                       | GO:GO:0006544 | Shmt1   | Shmt2   |
| double-stranded DNA binding                              | GO:GO:0003690 | Fen1    | Pola1   |
| delta DNA polymerase complex                             | GO:GO:0043625 | Cdc6    | Pold3   |
| long-chain fatty acid biosynthesis                       | GO:GO:0042759 | Elovl5  | Fads1   |
| outer kinetochore of condensed chromosome                | GO:GO:0000940 | Bub1b   | Cenpf   |
| tRNA processing                                          | GO:GO:0008033 | Rpp14   | Wdr4    |
| cell surface                                             | GO:GO:0009986 | Ckap4   | P4hb    |
| L-serine biosynthesis                                    | GO:GO:0006564 | Phgdh   | Psat1   |
| epithelial cell differentiation                          | GO:GO:0030855 | Fzd1    | Neurog3 |
| fatty acid elongase activity                             | GO:GO:0009922 | Elovl5  | Fen1    |
| hydrolase activity, acting on glycosyl bonds             | GO:GO:0016798 | Smpdl3b | Tdg     |
| positive regulation of I-kappaB kinase/NF-kappaB cascade | GO:GO:0043123 | Nup62   | Tgm2    |
| purine nucleotide metabolism                             | GO:GO:0006163 | Ada     | Amd1    |
| transcription from RNA polymerase I promoter             | GO:GO:0006360 | Rpa1    | Rpa2    |
| double-strand break repair via homologous recombination  | GO:GO:0000724 | Brca2   | Rad51   |
| protein disulfide oxidoreductase activity                | GO:GO:0015035 | P4hb    | Txndc5  |
| integrin-mediated signaling pathway                      | GO:GO:0007229 | Itga6   | Vav3    |
| RNA polymerase II transcription factor activity          | GO:GO:0003702 | Gtf2h2  | Hmgn1   |

|                                                                 |               |         |           |
|-----------------------------------------------------------------|---------------|---------|-----------|
| lagging strand elongation                                       | GO:GO:0006273 | Pcna    | Pola1     |
| mitotic spindle checkpoint                                      | GO:GO:0007094 | Cenpf   | Mad2l1    |
| induction of apoptosis                                          | GO:GO:0006917 | Siva    | Tgm2      |
| establishment and/or maintenance of cell polarity (sensu Fungi) | GO:GO:0030467 | Pck2    | Scd1      |
| cytokine and chemokine mediated signaling pathway               | GO:GO:0019221 | ligp1   | Tnfrsf1b  |
| endopeptidase inhibitor activity                                | GO:GO:0004866 | Birc5   | Serpina10 |
| protein import into nucleus, docking                            | GO:GO:0000059 | Kpnb1   | Xpo1      |
| I-kappaB kinase/NF-kappaB cascade                               | GO:GO:0007249 | Stat1   | T2bp      |
| SH2 domain binding                                              | GO:GO:0042169 | Nup62   | Shcbp1    |
| protein metabolism                                              | GO:GO:0019538 | Lap3    | Park2     |
| DNA replication factor A complex                                | GO:GO:0005662 | Rpa1    | Rpa2      |
| actin cytoskeleton                                              | GO:GO:0015629 | Cttnal1 | Proc      |
| ephrin receptor activity                                        | GO:GO:0005003 | Ephb2   | Ephb3     |
| transcription coactivator activity                              | GO:GO:0003713 | Apex1   | Taf9      |
| spermatogenesis                                                 | GO:GO:0007283 | Set     | Zipr1     |
| poly(A)+ mRNA export from nucleus                               | GO:GO:0016973 | Gbp2    | Nup107    |
| M phase of mitotic cell cycle                                   | GO:GO:0000087 | Cdc25b  | Cdc7      |
| chromatin silencing at telomere                                 | GO:GO:0006348 | Mcm10   | Rif1      |
| mRNA cleavage                                                   | GO:GO:0006379 | Cpsf2   | Cstf2     |
| fatty acid biosynthesis                                         | GO:GO:0006633 | Mod1    | Scd1      |
| central nervous system development                              | GO:GO:0007417 | Park2   | Wwp1      |
| lysosome                                                        | GO:GO:0005764 | Ap3m1   | Entpd4    |
| negative regulation of progression through cell cycle           | GO:GO:0045786 | Cdk2ap1 | Lats2     |
| telomeric DNA binding                                           | GO:GO:0042162 | Gbp2    | Rif1      |
| cell wall biosynthesis (sensu Fungi)                            | GO:GO:0009272 | Lrg1    | Pck2      |
| extracellular matrix organization and biogenesis                | GO:GO:0030198 | Mia1    | Pomt1     |
| gametogenesis                                                   | GO:GO:0007276 | Chek1   | Fanc1     |
| gastrulation (sensu Mammalia)                                   | GO:GO:0010003 | Amot    | Odz4      |
| proton transport                                                | GO:GO:0015992 | Atp4a   | Atp6ap2   |
| damaged DNA binding                                             | GO:GO:0003684 | Fen1    | Rad51     |
| muscle contraction                                              | GO:GO:0006936 | Acta2   | Utrn      |
| regulation of striated muscle development                       | GO:GO:0016202 | Boc     | Cenpf     |
| phospholipid dephosphorylation                                  | GO:GO:0046839 | Mtm1    | Ppap2a    |

|                                                                      |               |          |         |
|----------------------------------------------------------------------|---------------|----------|---------|
| carboxy-lyase activity                                               | GO:GO:0016831 | Amd1     | Pck2    |
| cell-matrix adhesion                                                 | GO:GO:0007160 | Itga6    | Mia1    |
| T cell differentiation                                               | GO:GO:0030217 | Bcl11a   | Ppp3cb  |
| cyclin binding                                                       | GO:GO:0030332 | Cdk4     | Set     |
| muscle maintenance                                                   | GO:GO:0046716 | Mtm1     | Ppp3cb  |
| ribonuclease H activity                                              | GO:GO:0004523 | Apex1    | Fen1    |
| spermatid development                                                | GO:GO:0007286 | Ppp2r2b  | Ran     |
| hydrogen ion transporter activity                                    | GO:GO:0015078 | Atp4a    | Atp6ap2 |
| regulation of GTPase activity                                        | GO:GO:0043087 | Arfgap1  | Vav3    |
| actomyosin structure organization and biogenesis                     | GO:GO:0031032 | Cnn1     | Cnn3    |
| negative regulation of cell growth                                   | GO:GO:0030308 | Dnajc2   | Grem1   |
| positive regulation of transcription from RNA polymerase II promoter | GO:GO:0045944 | Neurog3  | Top2a   |
| ribonucleoside-diphosphate reductase activity                        | GO:GO:0004748 | Rrm1     | Rrm2    |
| hyaluronic acid binding                                              | GO:GO:0005540 | Cd44     | Hmmr    |
| barrier septum                                                       | GO:GO:0000935 | Pck2     | Scd1    |
| synaptic vesicle                                                     | GO:GO:0008021 | Sypl     | Syt9    |
| methenyltetrahydrofolate cyclohydrolase activity                     | GO:GO:0004477 | Mthfd2   |         |
| regulation of circadian rhythm                                       | GO:GO:0042752 | Timeless |         |
| imidazolonepropionase activity                                       | GO:GO:0050480 | Amdhd1   |         |
| cytoplasmic sequestering of transcription factor                     | GO:GO:0042994 | Tacc3    |         |
| specific transcriptional repressor activity                          | GO:GO:0016566 | Recc1    |         |
| SAGA complex                                                         | GO:GO:0000124 | Taf9     |         |
| malate dehydrogenase (oxaloacetate-decarboxylating) (NADP+) activity | GO:GO:0004473 | Mod1     |         |
| regulation of neuronal synaptic plasticity                           | GO:GO:0048168 | Ephb2    |         |
| calcium-dependent protein serine/threonine phosphatase activity      | GO:GO:0004723 | Ppp3cb   |         |
| complement component C1q binding                                     | GO:GO:0001849 | C1qbp    |         |
| phosphoenolpyruvate carboxykinase activity                           | GO:GO:0004611 | Pck2     |         |
| sterol metabolism                                                    | GO:GO:0016125 | Ins1     |         |
| gap-junction forming channel activity                                | GO:GO:0005243 | Gjb2     |         |

|                                                                  |               |          |
|------------------------------------------------------------------|---------------|----------|
| centromeric DNA binding                                          | GO:GO:0019237 | Kif2c    |
| morphogenesis of an epithelium                                   | GO:GO:0002009 | Timeless |
| voltage-gated potassium channel complex                          | GO:GO:0008076 | Kcnn4    |
| barrier septum formation                                         | GO:GO:0000917 | Scd1     |
| UTP biosynthesis                                                 | GO:GO:0006228 | Nme1     |
| guard mother cell cytokinesis                                    | GO:GO:0010235 | Scd1     |
| induction of an organ                                            | GO:GO:0001759 | Hoxa11   |
| transcription cofactor activity                                  | GO:GO:0003712 | Trip13   |
| nuclear export                                                   | GO:GO:0051168 | Xpo1     |
| copper, zinc superoxide dismutase activity                       | GO:GO:0004785 | Scd1     |
| phosphorylation                                                  | GO:GO:0016310 | Galk1    |
| neuronal Cdc2-like kinase binding                                | GO:GO:0042808 | Cdk5rap2 |
| p53 binding                                                      | GO:GO:0002039 | Tfam     |
| physiological process                                            | GO:GO:0007582 | Ins1     |
| cyclin-dependent protein kinase inhibitor activity               | GO:GO:0004861 | Cdkn2c   |
| chromatin silencing at silent mating-type cassette               | GO:GO:0030466 | Mcm10    |
| blood vessel remodeling                                          | GO:GO:0001974 | Tgm2     |
| tracheal system development (sensu Insecta)                      | GO:GO:0007424 | Cdk4     |
| spindle organization and biogenesis                              | GO:GO:0007051 | Scd1     |
| thyroid hormone receptor binding                                 | GO:GO:0046966 | Nup62    |
| prostaglandin transport                                          | GO:GO:0015732 | Slco3a1  |
| vasculogenesis                                                   | GO:GO:0001570 | Amot     |
| cell migration during gastrulation                               | GO:GO:0042074 | Amot     |
| isopeptide cross-linking via N6-(L-isoglutamyl)-L-lysine         | GO:GO:0018153 | Tgm2     |
| neuromuscular junction development                               | GO:GO:0007528 | Utrn     |
| caspase inhibitor activity                                       | GO:GO:0043027 | Birc5    |
| site-specific DNA-methyltransferase (cytosine-specific) activity | GO:GO:0008326 | Dnmt1    |
| folic acid and derivative biosynthesis                           | GO:GO:0009396 | Mthfd2   |
| dopamine metabolism                                              | GO:GO:0042417 | Park2    |
| protein N-terminus binding                                       | GO:GO:0047485 | Rpa2     |
| tryptophan-tRNA ligase activity                                  | GO:GO:0004830 | Wars     |
| CD27 receptor binding                                            | GO:GO:0005175 | Siva     |

|                                                |               |          |
|------------------------------------------------|---------------|----------|
| chemoattractant activity                       | GO:GO:0042056 | Ccl9     |
| CXCR3 chemokine receptor binding               | GO:GO:0048248 | Cxcl9    |
| regulation of cell volume                      | GO:GO:0006884 | Clns1a   |
| mRNA cleavage and polyadenylation              |               |          |
| specificity factor complex                     | GO:GO:0005847 | Cpsf2    |
| regulation of cell cycle                       | GO:GO:0051726 | Ccnb1    |
| methylated-DNA-[protein]-cysteine S-           |               |          |
| methyltransferase activity                     | GO:GO:0003908 | Ada      |
| RNA ligase (ATP) activity                      | GO:GO:0003972 | Lig1     |
| transcription initiation from RNA polymerase   |               |          |
| II promoter                                    | GO:GO:0006367 | Taf9     |
| signal transduction during conjugation with    |               |          |
| cellular fusion                                | GO:GO:0032005 | Scd1     |
| deoxyribonucleotide metabolism                 | GO:GO:0009262 | Rrm2     |
| maintenance of DNA methylation                 | GO:GO:0010216 | Dnmt1    |
| peptidyl-proline hydroxylation to 4-hydroxy-L- |               |          |
| proline                                        | GO:GO:0018401 | P4hb     |
| monovalent inorganic cation transport          | GO:GO:0015672 | Atp4a    |
| startle response                               | GO:GO:0001964 | Park2    |
| positive regulation of protein secretion       | GO:GO:0050714 | Kcnn4    |
| filopodium formation                           | GO:GO:0046847 | Itga6    |
| negative regulation of astrocyte               |               |          |
| differentiation                                | GO:GO:0048712 | Id4      |
| regulation of neuron differentiation           | GO:GO:0045664 | Cdk5rap2 |
| integral to endoplasmic reticulum membrane     | GO:GO:0030176 | Scd1     |
| peptide cross-linking                          | GO:GO:0018149 | Tgm2     |
| cytosolic small ribosomal subunit (sensu       |               |          |
| Eukaryota)                                     | GO:GO:0005843 | Rps6     |
| purinergic nucleotide receptor activity, G-    |               |          |
| protein coupled                                | GO:GO:0045028 | Ffar2    |
| calcium- and calmodulin-dependent protein      |               |          |
| kinase activity                                | GO:GO:0004685 | Itpka    |
| regulation of Ras protein signal transduction  | GO:GO:0046578 | Nup62    |
| transcription-coupled nucleotide-excision      |               |          |
| repair                                         | GO:GO:0006283 | Hmgn1    |

|                                                          |               |          |
|----------------------------------------------------------|---------------|----------|
| connexon complex                                         | GO:GO:0005922 | Gjb2     |
| 'de novo' IMP biosynthesis                               | GO:GO:0006189 | Gart     |
| methylenetetrahydrofolate dehydrogenase (NADP+) activity | GO:GO:0004488 | Mthfd2   |
| glutamate biosynthesis                                   | GO:GO:0006537 | Idh1     |
| rRNA export from nucleus                                 | GO:GO:0006407 | Nup107   |
| flap endonuclease activity                               | GO:GO:0048256 | Fen1     |
| nucleoside metabolism                                    | GO:GO:0009116 | Prps2    |
| enzyme activator activity                                | GO:GO:0008047 | Recc1    |
| regulation of lipid metabolism                           | GO:GO:0019216 | Ppap2a   |
| aster                                                    | GO:GO:0005818 | Tpx2     |
| re-entry into mitotic cell cycle                         | GO:GO:0000320 | Ccnd1    |
| metal ion transporter activity                           | GO:GO:0046873 | Slc39a8  |
| apical plasma membrane                                   | GO:GO:0016324 | Slc12a2  |
| ribonuclease P activity                                  | GO:GO:0004526 | Rpp14    |
| androgen receptor signaling pathway                      | GO:GO:0030521 | Ppap2a   |
| Ran GTPase activator activity                            | GO:GO:0005098 | Rangap1  |
| positive regulation of transcription                     | GO:GO:0045941 | Nup62    |
| prolyl aminopeptidase activity                           | GO:GO:0016804 | Lap3     |
| dynein binding                                           | GO:GO:0045502 | Cenpf    |
| gene silencing                                           | GO:GO:0016458 | Rpa2     |
| negative regulation of DNA replication                   | GO:GO:0008156 | Gmnn     |
| vesicle fusion                                           | GO:GO:0006906 | Vav3     |
| lipid biosynthesis                                       | GO:GO:0008610 | Scd1     |
| embryonic limb morphogenesis                             | GO:GO:0030326 | Grem1    |
| tryptophan metabolism                                    | GO:GO:0006568 | Indo     |
| positive regulation of inflammatory response             | GO:GO:0050729 | Tgm2     |
| stearoyl-CoA 9-desaturase activity                       | GO:GO:0004768 | Scd1     |
| tropomyosin binding                                      | GO:GO:0005523 | Cnn3     |
| eukaryotic initiation factor 4E binding                  | GO:GO:0008190 | Eif4ebp2 |
| FAD binding                                              | GO:GO:0050660 | Steap1   |
| AMP deaminase activity                                   | GO:GO:0003876 | Amd1     |
| DNA polymerase processivity factor activity              | GO:GO:0030337 | Pcna     |
| protein polymerization                                   | GO:GO:0051258 | Tubb5    |



|                                                                   |               |          |
|-------------------------------------------------------------------|---------------|----------|
| deoxyribonucleoside diphosphate metabolism                        | GO:GO:0009186 | Rrm2     |
| positive transcription elongation factor activity                 | GO:GO:0008159 | Hmgn1    |
| PCNA complex                                                      | GO:GO:0043626 | Pcna     |
| positive regulation of cell adhesion                              | GO:GO:0045785 | Vav3     |
| viral capsid assembly                                             | GO:GO:0019069 | Abce1    |
| cation:chloride symporter activity                                | GO:GO:0015377 | Slc12a2  |
| snoRNA binding                                                    | GO:GO:0030515 | Nola1    |
| spermine biosynthesis                                             | GO:GO:0006597 | Amd1     |
| strand invasion                                                   | GO:GO:0042148 | Rad51    |
| UV protection                                                     | GO:GO:0009650 | Fen1     |
| lateral plasma membrane                                           | GO:GO:0016328 | Gjb2     |
| nuclear envelope lumen                                            | GO:GO:0005641 | Hrasls   |
| polyribonucleotide nucleotidyltransferase activity                | GO:GO:0004654 | Pnpt1    |
| response to toxin                                                 | GO:GO:0009636 | Blmh     |
| receptor signaling complex scaffold activity                      | GO:GO:0030159 | Nup62    |
| pyrimidine ribonucleoside triphosphate biosynthesis               | GO:GO:0009209 | Nme1     |
| protein phosphatase inhibitor activity                            | GO:GO:0004864 | Ppp1r14b |
| caspase activation                                                | GO:GO:0006919 | Stat1    |
| protein amino acid O-linked glycosylation                         | GO:GO:0006493 | Pomt1    |
| rhythmic process                                                  | GO:GO:0048511 | Timeless |
| telomere maintenance via recombination                            | GO:GO:0000722 | Rad51    |
| odontogenesis (sensu Vertebrata)                                  | GO:GO:0042475 | Itga6    |
| dopamine uptake                                                   | GO:GO:0051583 | Park2    |
| ESC/E(Z) complex                                                  | GO:GO:0035098 | Suz12    |
| protein amino acid N-linked glycosylation via asparagine          | GO:GO:0018279 | Mgat2    |
| citrate metabolism                                                | GO:GO:0006101 | Polr3h   |
| defense response to pathogenic bacteria, incompatible interaction | GO:GO:0009816 | Rrs1     |
| DNA ligase (NAD+) activity                                        | GO:GO:0003911 | Recc1    |
| carrier activity                                                  | GO:GO:0005386 | Slc12a2  |
| RNA localization                                                  | GO:GO:0006403 | Ran      |
| chorion gene amplification                                        | GO:GO:0007307 | Mcm6     |

|                                                                                       |               |          |
|---------------------------------------------------------------------------------------|---------------|----------|
| ubiquitin binding                                                                     | GO:GO:0043130 | Nup62    |
| exocytosis                                                                            | GO:GO:0006887 | Zwint    |
| adenosine deaminase activity                                                          | GO:GO:0004000 | Ada      |
| translation elongation factor activity                                                | GO:GO:0003746 | Eftud2   |
| regulation of body size                                                               | GO:GO:0040014 | Atrn     |
| skeletal development                                                                  | GO:GO:0001501 | Hoxa11   |
| protein import into nucleus, translocation                                            | GO:GO:0000060 | Kpnb1    |
| negative regulation of neuron apoptosis                                               | GO:GO:0043524 | Birc5    |
| epidermal growth factor receptor binding                                              | GO:GO:0005154 | Vav3     |
| tumor necrosis factor receptor activity                                               | GO:GO:0005031 | Tnfrsf1b |
| cytosolic ribosome (sensu Eukaryota)                                                  | GO:GO:0005830 | Rps6     |
| positive regulation of nitric-oxide synthase activity                                 | GO:GO:0051000 | Ins1     |
| protein amino acid N-linked glycosylation                                             | GO:GO:0006487 | Mgat2    |
| cell septum                                                                           | GO:GO:0030428 | Pck2     |
| oligosaccharide biosynthesis                                                          | GO:GO:0009312 | Mgat2    |
| sarcomere                                                                             | GO:GO:0030017 | Lman1    |
| vacuole (sensu Fungi)                                                                 | GO:GO:0000324 | Prc1     |
| pronucleus                                                                            | GO:GO:0045120 | Cenpf    |
| myo-inositol metabolism                                                               | GO:GO:0006020 | Itпка    |
| prefoldin complex                                                                     | GO:GO:0016272 | C80913   |
| lipoate-protein ligase B activity                                                     | GO:GO:0016978 | Prps2    |
| heteroduplex formation                                                                | GO:GO:0030491 | Rad51    |
| protein targeting to lysosome                                                         | GO:GO:0006622 | Ap3m1    |
| protein homooligomerization                                                           | GO:GO:0051260 | Tgm2     |
| gastric acid secretion                                                                | GO:GO:0001696 | Atp4a    |
| ureteric bud branching                                                                | GO:GO:0001658 | Cd44     |
| regulation of axonogenesis                                                            | GO:GO:0050770 | Ephb2    |
| regulation of bone mineralization                                                     | GO:GO:0030500 | Omd      |
| ATPase activity, coupled to transmembrane movement of ions, phosphorylative mechanism | GO:GO:0015662 | Atp4a    |
| positive regulation of mitosis                                                        | GO:GO:0045840 | Nusap1   |
| cytokinesis after mitosis                                                             | GO:GO:0000281 | Nusap1   |
| response to virus                                                                     | GO:GO:0009615 | Xpo1     |
| DNA topoisomerase activity                                                            | GO:GO:0003916 | Top2a    |
| mannose binding                                                                       | GO:GO:0005537 | Lman1    |

|                                                              |               |         |
|--------------------------------------------------------------|---------------|---------|
| neuron projection                                            | GO:GO:0043005 | Park2   |
| regulation of synaptic transmission                          | GO:GO:0050804 | Park2   |
| ceramide metabolism                                          | GO:GO:0006672 | Ppap2a  |
| SLIK (SAGA-like) complex                                     | GO:GO:0046695 | Taf9    |
| transmembrane receptor protein tyrosine phosphatase activity | GO:GO:0005001 | Ptpro   |
| synaptic transmission                                        | GO:GO:0007268 | Kcnk3   |
| primary spermatocyte growth                                  | GO:GO:0007285 | Boc     |
| tubulin binding                                              | GO:GO:0015631 | Stmn1   |
| protein kinase C activity                                    | GO:GO:0004697 | Pck2    |
| Barr body                                                    | GO:GO:0001740 | H2afz   |
| amino acid transport                                         | GO:GO:0006865 | Slc12a2 |
| sulfur amino acid biosynthesis                               | GO:GO:0000097 | Cdo1    |
| induction of positive chemotaxis                             | GO:GO:0050930 | Cxcl9   |
| recombinase activity                                         | GO:GO:0000150 | Rad51   |
| protein-hormone receptor activity                            | GO:GO:0016500 | Lgr5    |
| galactose metabolism                                         | GO:GO:0006012 | Galk1   |
| protein kinase cascade                                       | GO:GO:0007243 | Socs3   |
| blastoderm segmentation                                      | GO:GO:0007350 | Cdk4    |
| M phase specific microtubule process                         | GO:GO:0000072 | Rangap1 |
| cysteine dioxygenase activity                                | GO:GO:0017172 | Cdo1    |
| vacuolar lumen (sensu Fungi)                                 | GO:GO:0000328 | Prc1    |
| nuclear matrix                                               | GO:GO:0016363 | Cenpf   |
| STAT protein nuclear translocation                           | GO:GO:0007262 | Stat1   |
| neutral amino acid transporter activity                      | GO:GO:0015175 | Slc1a4  |
| axonemal dynein complex                                      | GO:GO:0005858 | Dynlt1  |
| insulin-like growth factor receptor signaling pathway        | GO:GO:0048009 | Perq1   |
| DNA replication checkpoint                                   | GO:GO:0000076 | Rfc2    |
| heterochromatin                                              | GO:GO:0000792 | Dnmt1   |
| olfactory receptor activity                                  | GO:GO:0004984 | Olf157  |
| G1 phase of mitotic cell cycle                               | GO:GO:0000080 | Cdc2a   |
| clathrin vesicle coat                                        | GO:GO:0030125 | Ap3m1   |
| nucleotide kinase activity                                   | GO:GO:0019201 | Taf9    |
| hydrolase activity, hydrolyzing O-glycosyl compounds         | GO:GO:0004553 | Pnpt1   |
| Rho protein signal transduction                              | GO:GO:0007266 | Cttnal1 |

|                                                          |               |          |
|----------------------------------------------------------|---------------|----------|
| indoleamine-pyrrole 2,3-dioxygenase activity             | GO:GO:0004426 | Indo     |
| embryonic eye morphogenesis                              | GO:GO:0048048 | Cct3     |
| exosome (RNase complex)                                  | GO:GO:0000178 | Ran      |
| B cell differentiation                                   | GO:GO:0030183 | Bcl11a   |
| alpha-beta T cell activation                             | GO:GO:0046631 | Ins1     |
| cadherin binding                                         | GO:GO:0045296 | Ctnnal1  |
| cell redox homeostasis                                   | GO:GO:0045454 | Apex1    |
| angiogenesis                                             | GO:GO:0001525 | Narg1    |
| negative regulation of protein biosynthesis              | GO:GO:0017148 | Eif4ebp2 |
| nuclear inner membrane                                   | GO:GO:0005637 | Tmpo     |
| TATA-binding protein binding                             | GO:GO:0017025 | Taf9     |
| cobalt ion binding                                       | GO:GO:0050897 | Pa2g4    |
| bleomycin hydrolase activity                             | GO:GO:0008423 | Blmh     |
| mitotic spindle organization and biogenesis              | GO:GO:0007052 | Stmn1    |
| hydroxymethyl-, formyl- and related transferase activity | GO:GO:0016742 | Gart     |
| fin regeneration                                         | GO:GO:0031101 | Hspd1    |
| gamma-aminobutyric acid signaling pathway                | GO:GO:0007214 | Slc12a2  |
| adenylate kinase activity                                | GO:GO:0004017 | Taf9     |
| female pronucleus                                        | GO:GO:0001939 | Rif1     |
| linoleoyl-CoA desaturase activity                        | GO:GO:0016213 | Fads1    |
| multidimensional cell growth                             | GO:GO:0009825 | Scd1     |
| synaptic transmission, glutamatergic                     | GO:GO:0035249 | Park2    |
| snoRNP binding                                           | GO:GO:0030519 | Nol5     |
| biosynthesis                                             | GO:GO:0009058 | Gart     |
| phosphoribosylamine-glycine ligase activity              | GO:GO:0004637 | Gart     |
| chaperone binding                                        | GO:GO:0051087 | Hspd1    |
| ATPase activity, coupled                                 | GO:GO:0042623 | Hspe1    |
| negative regulation of neuron differentiation            | GO:GO:0045665 | Id4      |
| cell migration                                           | GO:GO:0016477 | Vav3     |
| cell projection biogenesis                               | GO:GO:0030031 | Vav3     |
| nucleoside triphosphate biosynthesis                     | GO:GO:0009142 | Nme1     |
| meiotic chromosome segregation                           | GO:GO:0045132 | Sgol1    |

|                                                                   |               |          |
|-------------------------------------------------------------------|---------------|----------|
| negative regulation of translational initiation                   | GO:GO:0045947 | Eif4ebp2 |
| cell wall (sensu Fungi)                                           | GO:GO:0009277 | Gas5     |
| Golgi medial cisterna                                             | GO:GO:0005797 | Nucb2    |
| paraxial mesoderm development                                     | GO:GO:0048339 | Epb4.115 |
| L-serine catabolism                                               | GO:GO:0006565 | Shmt1    |
| actin filament polymerization                                     | GO:GO:0030041 | Diap2    |
| main pathways of carbohydrate metabolism                          | GO:GO:0006092 | Idh1     |
| male genitalia development                                        | GO:GO:0030539 | Gjb2     |
| sex chromatin                                                     | GO:GO:0001739 | Suz12    |
| protein disulfide isomerase activity                              | GO:GO:0003756 | P4hb     |
| nuclear heterochromatin                                           | GO:GO:0005720 | Cbx5     |
| oxidoreductase activity, acting on iron-sulfur proteins as donors | GO:GO:0016730 | Lats2    |
| Nup107-160 complex                                                | GO:GO:0031080 | Nup107   |
| peptidyl-threonine phosphorylation                                | GO:GO:0018107 | Pbk      |
| polynucleotide adenylyltransferase activity                       | GO:GO:0004652 | Pap      |
| L-cysteine catabolism to taurine                                  | GO:GO:0019452 | Cdo1     |
| regulation of JAK-STAT cascade                                    | GO:GO:0046425 | Statip1  |
| positive regulation of smooth muscle cell proliferation           | GO:GO:0048661 | Tgm2     |
| chromatin silencing                                               | GO:GO:0006342 | Hells    |
| dynein complex                                                    | GO:GO:0030286 | Dynlt1   |
| delta DNA polymerase activity                                     | GO:GO:0003891 | Pold3    |
| nucleosome                                                        | GO:GO:0000786 | H2afz    |
| ribonucleoside-diphosphate reductase complex                      | GO:GO:0005971 | Rrm1     |
| auxin polar transport                                             | GO:GO:0009926 | Rcn1     |
| female meiosis chromosome segregation                             | GO:GO:0016321 | Mcm10    |
| insoluble fraction                                                | GO:GO:0005626 | Ppp3cb   |
| pyrimidine nucleotide biosynthesis                                | GO:GO:0006221 | Ctps     |
| cortical actin cytoskeleton                                       | GO:GO:0030864 | Utrn     |
| vasodilation                                                      | GO:GO:0042311 | Vip      |
| glucose metabolism                                                | GO:GO:0006006 | Ins1     |
| gap junction                                                      | GO:GO:0005921 | Gjb2     |
| urogenital system development                                     | GO:GO:0001655 | Hells    |
| carboxypeptidase activity                                         | GO:GO:0004180 | Blmh     |

|                                                                                   |               |           |
|-----------------------------------------------------------------------------------|---------------|-----------|
| neuroblast proliferation (sensu Vertebrata)                                       | GO:GO:0043350 | Id4       |
| extracellular matrix structural constituent                                       | GO:GO:0005201 | Omd       |
| entry of virus into host cell                                                     | GO:GO:0046718 | Wwp1      |
| telomere cap complex                                                              | GO:GO:0000782 | Rif1      |
| regulation of cell migration                                                      | GO:GO:0030334 | Amot      |
| septation initiation signaling                                                    | GO:GO:0031028 | Cdc7      |
| chloroplast                                                                       | GO:GO:0009507 | Wwp1      |
| cytoplasmic dynein complex                                                        | GO:GO:0005868 | Dynlt1    |
| response to pathogenic fungi                                                      | GO:GO:0009621 | Rpp14     |
| regulation of smooth muscle contraction                                           | GO:GO:0006940 | Cnn1      |
| hyperosmotic response                                                             | GO:GO:0006972 | Slc12a2   |
| regulation of mitosis                                                             | GO:GO:0007088 | Nek2      |
| protein oligomerization                                                           | GO:GO:0051259 | Tgm2      |
| dicarboxylic acid transport                                                       | GO:GO:0006835 | Slc1a4    |
| positive regulation of embryonic development                                      | GO:GO:0040019 | Amot      |
| deoxyribonuclease activity                                                        | GO:GO:0004536 | Nme1      |
| negative regulation of transforming growth factor beta receptor signaling pathway | GO:GO:0030512 | Strap     |
| nucleoside-diphosphatase activity                                                 | GO:GO:0017110 | Entpd4    |
| ribosome assembly                                                                 | GO:GO:0042255 | Pa2g4     |
| exodeoxyribonuclease activity                                                     | GO:GO:0004529 | Fen1      |
| connexon channel activity                                                         | GO:GO:0015285 | Gjb2      |
| 5'-3' exonuclease activity                                                        | GO:GO:0008409 | Fen1      |
| metallochaperone activity                                                         | GO:GO:0016530 | Mtm1      |
| protein amino acid acetylation                                                    | GO:GO:0006473 | Taf9      |
| insulin-like growth factor binding protein complex                                | GO:GO:0016942 | Igfbp5    |
| transcription elongation factor complex                                           | GO:GO:0008023 | Statip1   |
| fatty acid metabolism                                                             | GO:GO:0006631 | Acs15     |
| nuclear outer membrane                                                            | GO:GO:0005640 | Nucb2     |
| chaperonin-containing T-complex                                                   | GO:GO:0005832 | Cct3      |
| adult somatic muscle development                                                  | GO:GO:0007527 | Utrn      |
| serine-type endopeptidase inhibitor activity                                      | GO:GO:0004867 | Serpina10 |
| S-adenosylmethionine metabolism                                                   | GO:GO:0046500 | Pnmt      |
| purine ribonucleoside monophosphate biosynthesis                                  | GO:GO:0009168 | Ada       |

|                                                     |               |          |
|-----------------------------------------------------|---------------|----------|
| central element                                     | GO:GO:0000801 | Incenp   |
| cell junction                                       | GO:GO:0030054 | Utrn     |
| mitotic checkpoint                                  | GO:GO:0007093 | Brca2    |
| DNA topological change                              | GO:GO:0006265 | Top2a    |
| pyrimidine nucleotide binding                       | GO:GO:0019103 | Pola1    |
| protein phosphatase type 1 regulator activity       | GO:GO:0008599 | Ppp1r14b |
| cAMP-mediated signaling                             | GO:GO:0019933 | Eif4ebp2 |
| fat cell differentiation                            | GO:GO:0045444 | Ccnd1    |
| nucleoside diphosphate kinase activity              | GO:GO:0004550 | Nme1     |
| response to oxidative stress                        | GO:GO:0006979 | Idh1     |
| glutamate-5-semialdehyde dehydrogenase activity     | GO:GO:0004350 | Aldh18a1 |
| Cajal body                                          | GO:GO:0015030 | Nolc1    |
| nuclear localization sequence binding               | GO:GO:0008139 | Kpnb1    |
| insulin receptor binding                            | GO:GO:0005158 | Ins1     |
| protein localization                                | GO:GO:0008104 | Incenp   |
| DNA-directed RNA polymerase II, core complex        | GO:GO:0005665 | Polr2a   |
| site of polarized growth                            | GO:GO:0030427 | Scd1     |
| response to antibiotic                              | GO:GO:0046677 | Lap3     |
| purine base metabolism                              | GO:GO:0006144 | Ada      |
| dense fibrillar component                           | GO:GO:0001651 | Nola1    |
| transmembrane receptor activity                     | GO:GO:0004888 | Utrn     |
| lamin binding                                       | GO:GO:0005521 | Tmpo     |
| amino acid-polyamine transporter activity           | GO:GO:0005279 | Slc12a2  |
| cysteine metabolism                                 | GO:GO:0006534 | Cdo1     |
| protein amino acid terminal N-glycosylation         | GO:GO:0006496 | Mgat2    |
| malate metabolism                                   | GO:GO:0006108 | Mod1     |
| negative regulation of signal transduction          | GO:GO:0009968 | Socs3    |
| endocytic vesicle                                   | GO:GO:0030139 | Amot     |
| autophagy                                           | GO:GO:0006914 | Wipi2    |
| positive regulation of transcription, DNA-dependent | GO:GO:0045893 | Tfam     |

|                                                                                              |               |               |
|----------------------------------------------------------------------------------------------|---------------|---------------|
| hydrolase activity, acting on carbon-nitrogen<br>(but not peptide) bonds, in cyclic amidines | GO:GO:0016814 | Apobec3       |
| nuclear membrane                                                                             | GO:GO:0031965 | Nup107        |
| regulation of cyclin-dependent protein kinase<br>activity                                    | GO:GO:0000079 | Chek1         |
| L-cysteine metabolism                                                                        | GO:GO:0046439 | Cdo1          |
| Hsp70 protein binding                                                                        | GO:GO:0030544 | Cdc2a         |
| cell communication                                                                           | GO:GO:0007154 | Gjb2          |
| zinc ion transporter activity                                                                | GO:GO:0005385 | Slc39a8       |
| telomeric 3' overhang formation                                                              | GO:GO:0031860 | Rif1          |
| GMP biosynthesis                                                                             | GO:GO:0006177 | Impdh2        |
| response to methylmercury                                                                    | GO:GO:0051597 | Rad51         |
| transaminase activity                                                                        | GO:GO:0008483 | Psat1         |
| chemokine receptor binding                                                                   | GO:GO:0042379 | Cxcl11        |
| circulation                                                                                  | GO:GO:0008015 | Clns1a        |
| tryptophanyl-tRNA aminoacylation                                                             | GO:GO:0006436 | Wars          |
| malate dehydrogenase (decarboxylating)<br>activity                                           | GO:GO:0004471 | Mod1          |
| lamellipodium                                                                                | GO:GO:0030027 | Amot          |
| lipid metabolism                                                                             | GO:GO:0006629 | Acs15         |
| catecholamine biosynthesis                                                                   | GO:GO:0042423 | Pnmt          |
| spermidine biosynthesis                                                                      | GO:GO:0008295 | Amd1          |
| proximal/distal pattern formation                                                            | GO:GO:0009954 | Grem1         |
| epsilon DNA polymerase complex                                                               | GO:GO:0008622 | Pole2         |
| NuRD complex                                                                                 | GO:GO:0016581 | Rbbp4         |
| regulation of protein amino acid<br>phosphorylation                                          | GO:GO:0001932 | Socs3         |
| mannosyltransferase activity                                                                 | GO:GO:0000030 | Pomt1         |
| protein kinase activator activity                                                            | GO:GO:0030295 | 1190002H23Rik |
| sodium:potassium:chloride symporter activity                                                 | GO:GO:0008511 | Slc12a2       |
| rRNA binding                                                                                 | GO:GO:0019843 | Nola1         |
| chromatin assembly complex                                                                   | GO:GO:0005678 | Nap11         |
| ribulose-phosphate 3-epimerase activity                                                      | GO:GO:0004750 | Rpe           |
| transmembrane receptor protein tyrosine<br>phosphatase signaling pathway                     | GO:GO:0007185 | Ptpro         |



|                                                        |               |         |
|--------------------------------------------------------|---------------|---------|
| negative regulation of vasodilation                    | GO:GO:0045908 | Ins1    |
| positive regulation of cell volume                     | GO:GO:0045795 | Slc12a2 |
| vesicular fraction                                     | GO:GO:0042598 | Wnk1    |
| phosphoric monoester hydrolase activity                | GO:GO:0016791 | Cdc25b  |
| phosphoenolpyruvate carboxykinase (GTP) activity       | GO:GO:0004613 | Pck2    |
| axonogenesis                                           | GO:GO:0007409 | Stmn1   |
| metal ion transport                                    | GO:GO:0030001 | Slc39a8 |
| double-strand break repair via single-strand annealing | GO:GO:0045002 | Rad51   |
| neuron migration                                       | GO:GO:0001764 | Pomt1   |
| transcription initiation                               | GO:GO:0006352 | Taf9    |
| response to cadmium ion                                | GO:GO:0046686 | Rad51   |
| N-methyltransferase activity                           | GO:GO:0008170 | Aurkb   |
| release of cytoplasmic sequestered NF-kappaB           | GO:GO:0008588 | Tgm2    |
| regulation of DNA replication initiation               | GO:GO:0030174 | Cdt1    |
| large ribosomal subunit                                | GO:GO:0015934 | Rpl7l1  |
| calcium-activated potassium channel activity           | GO:GO:0015269 | Kcnn4   |
| procollagen-proline 4-dioxygenase activity             | GO:GO:0004656 | P4hb    |
| cation transport                                       | GO:GO:0006812 | Atp4a   |
| S-methyl-5-thioadenosine phosphorylase activity        | GO:GO:0017061 | Mtap    |
| mitotic nuclear envelope reassembly                    | GO:GO:0007084 | Tmpo    |
| histone methyltransferase activity                     | GO:GO:0042054 | Suz12   |
| negative regulation of retinal programmed cell death   | GO:GO:0046671 | Cct3    |
| galactokinase activity                                 | GO:GO:0004335 | Galk1   |
| regulation of stomatal movement                        | GO:GO:0010119 | Rcn1    |
| phosphatidate phosphatase activity                     | GO:GO:0008195 | Ppap2a  |
| regulation of muscle contraction                       | GO:GO:0006937 | Tpm3    |
| lactation                                              | GO:GO:0007595 | Nme1    |
| SWI/SNF complex                                        | GO:GO:0016514 | Smarcc1 |
| sodium:dicarboxylate symporter activity                | GO:GO:0017153 | Slc1a4  |
| nuclear lamina                                         | GO:GO:0005652 | Pcna    |
| locomotory behavior                                    | GO:GO:0007626 | Park2   |

|                                                                           |               |               |
|---------------------------------------------------------------------------|---------------|---------------|
| poly(A) binding                                                           | GO:GO:0008143 | Syncrip       |
| norepinephrine metabolism                                                 | GO:GO:0042415 | Park2         |
| nucleotide-excision repair                                                | GO:GO:0006289 | Rpa2          |
| peptidyl-prolyl cis-trans isomerase activity                              | GO:GO:0003755 | Fkbp3         |
| positive regulation of cell migration                                     | GO:GO:0030335 | Cxcl10        |
| MAP kinase kinase kinase activity                                         | GO:GO:0004709 | B230120H23Rik |
| fatty acid desaturation                                                   | GO:GO:0006636 | Fads1         |
|                                                                           |               |               |
| fatty acid elongation, unsaturated fatty acid                             | GO:GO:0019368 | Elovl5        |
| mRNA splice site selection                                                | GO:GO:0006376 | Sfrs2         |
| protection from non-homologous end joining at telomere                    | GO:GO:0031848 | Rif1          |
| 35S primary transcript processing                                         | GO:GO:0006365 | Rcl1          |
| positive regulation of epidermal growth factor receptor signaling pathway | GO:GO:0045742 | Nup62         |
| auxiliary transport protein activity                                      | GO:GO:0015457 | Clns1a        |
| oocyte maturation                                                         | GO:GO:0001556 | Ccnb1         |
| positive regulation of progression through cell cycle                     | GO:GO:0045787 | Cdk4          |
| RNA helicase activity                                                     | GO:GO:0003724 | Hnrpab        |
| nucleocytoplasmic shuttling complex                                       | GO:GO:0031074 | Nup62         |
| lamellipodium biogenesis                                                  | GO:GO:0030032 | Vav3          |
| ribonuclease MRP activity                                                 | GO:GO:0000171 | Nme1          |
| nuclear speck                                                             | GO:GO:0016607 | Sfrs2         |
| GTP biosynthesis                                                          | GO:GO:0006183 | Nme1          |
| nuclear telomeric heterochromatin                                         | GO:GO:0005724 | Rif1          |
| deaminase activity                                                        | GO:GO:0019239 | Ada           |
| skeletal muscle growth                                                    | GO:GO:0048630 | Igfbp5        |
| histone ubiquitination                                                    | GO:GO:0016574 | Suz12         |
| nuclear envelope-endoplasmic reticulum network                            | GO:GO:0042175 | Tmpo          |
| 1,3-beta-glucanosyltransferase activity                                   | GO:GO:0042124 | Gas5          |
| DNA-(apurinic or apyrimidinic site) lyase activity                        | GO:GO:0003906 | Apex1         |
| 3'-5'-exoribonuclease activity                                            | GO:GO:0000175 | Pnpt1         |
| sodium ion binding                                                        | GO:GO:0031402 | Slc12a2       |
| phosphoglycerate dehydrogenase activity                                   | GO:GO:0004617 | Phgdh         |

|                                                                                                |               |          |
|------------------------------------------------------------------------------------------------|---------------|----------|
| diacylglycerol biosynthesis                                                                    | GO:GO:0006651 | Ppap2a   |
| nuclear envelope reassembly                                                                    | GO:GO:0031468 | Tmpo     |
| response to stress                                                                             | GO:GO:0006950 | Tacc3    |
| spindle stabilization                                                                          | GO:GO:0043146 | Ccdc5    |
| protein import into mitochondrial matrix                                                       | GO:GO:0030150 | Hspd1    |
| oxidoreductase activity, acting on NADH or NADPH, NAD or NADP as acceptor                      | GO:GO:0016652 | Idh1     |
| negative regulation of coagulation                                                             | GO:GO:0050819 | Proc     |
| nitric-oxide synthase regulator activity                                                       | GO:GO:0030235 | Hmgb1    |
| chaperonin-mediated tubulin folding                                                            | GO:GO:0007022 | Cct3     |
| synaptic vesicle endocytosis                                                                   | GO:GO:0048488 | Cd24a    |
| origin recognition complex                                                                     | GO:GO:0000808 | Orc2l    |
| Rac guanyl-nucleotide exchange factor activity                                                 | GO:GO:0030676 | Vav3     |
| G-protein signaling, coupled to IP3 second messenger (phospholipase C activating)              | GO:GO:0007200 | Tgm2     |
| transcription from mitochondrial promoter                                                      | GO:GO:0006390 | Tfam     |
| L-serine transporter activity                                                                  | GO:GO:0015194 | Slc1a4   |
| double-strand break repair                                                                     | GO:GO:0006302 | Fen1     |
| transcription factor TFIID complex                                                             | GO:GO:0005669 | Taf9     |
| sensory perception of smell                                                                    | GO:GO:0007608 | Olf157   |
| actin filament organization                                                                    | GO:GO:0007015 | Ran      |
| potassium channel activity                                                                     | GO:GO:0005267 | Kcnk3    |
| embryonic cleavage                                                                             | GO:GO:0040016 | Top2a    |
| positive regulation of phosphoinositide 3-kinase activity                                      | GO:GO:0043552 | Vav3     |
| nuclear telomere cap complex                                                                   | GO:GO:0000783 | Rif1     |
| centrosome cycle                                                                               | GO:GO:0007098 | Nek2     |
| sensory perception                                                                             | GO:GO:0007600 | Cxcl10   |
| enzyme binding                                                                                 | GO:GO:0019899 | Tgm2     |
| double-stranded telomeric DNA binding                                                          | GO:GO:0003691 | Terf1    |
| axial mesoderm development                                                                     | GO:GO:0048318 | Epb4.115 |
| hydrolase activity, acting on acid anhydrides, catalyzing transmembrane movement of substances | GO:GO:0016820 | Atp4a    |
| actin nucleation                                                                               | GO:GO:0045010 | Proc     |
| oogenesis (sensu Insecta)                                                                      | GO:GO:0009993 | Mcm6     |

|                                                                                           |               |          |
|-------------------------------------------------------------------------------------------|---------------|----------|
| neuromuscular synaptic transmission                                                       | GO:GO:0007274 | Cd24a    |
| long-chain-fatty-acid-CoA ligase activity                                                 | GO:GO:0004467 | Acs15    |
| tRNA aminoacylation for protein translation                                               | GO:GO:0006418 | Wars     |
| spliceosome assembly                                                                      | GO:GO:0000245 | Gemin6   |
| muscle thin filament tropomyosin                                                          | GO:GO:0005862 | Tpm3     |
| DNA topoisomerase (ATP-hydrolyzing) activity                                              | GO:GO:0003918 | Top2a    |
| taurine biosynthesis                                                                      | GO:GO:0042412 | Cdo1     |
| enoyl-[acyl-carrier protein] reductase activity                                           | GO:GO:0016631 | Mod1     |
| phosphodiesterase I activity                                                              | GO:GO:0004528 | Apex1    |
| ribonucleoside monophosphate biosynthesis                                                 | GO:GO:0009156 | Prps2    |
| mitotic centrosome separation                                                             | GO:GO:0007100 | Kif11    |
| pyrimidine dimer repair via nucleotide-excision repair                                    | GO:GO:0000720 | Hmgn1    |
| cyclin catabolism                                                                         | GO:GO:0008054 | Ube2c    |
| general RNA polymerase II transcription factor activity                                   | GO:GO:0016251 | Taf9     |
| metanephros development                                                                   | GO:GO:0001656 | Hoxa11   |
| inner cell mass cell proliferation                                                        | GO:GO:0001833 | Luzp5    |
| lung development                                                                          | GO:GO:0030324 | Timeless |
| taurine metabolism                                                                        | GO:GO:0019530 | Cdo1     |
| growth cone                                                                               | GO:GO:0030426 | Utrn     |
| inositol or phosphatidylinositol phosphatase activity                                     | GO:GO:0004437 | Mtm1     |
| hematopoietin/interferon-class (D200-domain) cytokine receptor signal transducer activity | GO:GO:0005062 | Stat1    |
| polyamine metabolism                                                                      | GO:GO:0006595 | Amd1     |
| NLS-bearing substrate import into nucleus                                                 | GO:GO:0006607 | Kpnb1    |
| asparagine synthase (glutamine-hydrolyzing) activity                                      | GO:GO:0004066 | Asns     |
| monovalent inorganic cation transporter activity                                          | GO:GO:0015077 | Atp4a    |
| traversing start control point of mitotic cell cycle                                      | GO:GO:0007089 | Dbf4     |

|                                                               |               |             |
|---------------------------------------------------------------|---------------|-------------|
| viral envelope                                                | GO:GO:0019031 | D17H6S56E-5 |
| glutathione metabolism                                        | GO:GO:0006749 | Idh1        |
| negative regulation of blood coagulation                      | GO:GO:0030195 | Proc        |
| galactoside binding                                           | GO:GO:0016936 | Lgals2      |
| protein binding, bridging                                     | GO:GO:0030674 | Cnn3        |
| histone methylation                                           | GO:GO:0016571 | Suz12       |
| Rho GTPase activator activity                                 | GO:GO:0005100 | Lrg1        |
| structural constituent of chromatin                           | GO:GO:0030527 | Hmgb1       |
| cyclin-dependent protein kinase activity                      | GO:GO:0004693 | Cdk4        |
| negative regulation of non-apoptotic<br>programmed cell death | GO:GO:0043072 | Nup62       |
| response to UV-C                                              | GO:GO:0010225 | Hmgn1       |
| condensin complex                                             | GO:GO:0000796 | Smc4l1      |
| mitochondrial DNA replication                                 | GO:GO:0006264 | Tfam        |
| secretory pathway                                             | GO:GO:0045045 | Rpe         |
| protein C (activated) activity                                | GO:GO:0003808 | Proc        |
| ruffle                                                        | GO:GO:0001726 | Amot        |
| RNA-3'-phosphate cyclase activity                             | GO:GO:0003963 | Rcl1        |
| RNA metabolism                                                | GO:GO:0016070 | Hnrpa1      |
| acyltransferase activity                                      | GO:GO:0008415 | Tgm2        |
| bud neck                                                      | GO:GO:0005935 | Lrg1        |
| cytokinesis by cell plate formation                           | GO:GO:0000911 | Scd1        |
| regulation of progression through mitotic cell<br>cycle       | GO:GO:0007346 | Nek2        |
| sphingosine metabolism                                        | GO:GO:0006670 | Ppap2a      |
| calcium-mediated signaling                                    | GO:GO:0019722 | Rcn1        |
| negative regulation of phosphorylation                        | GO:GO:0042326 | Prkrip1     |
| kinetochore assembly                                          | GO:GO:0051382 | Cenpf       |
| manganese ion transport                                       | GO:GO:0006828 | Mtm1        |
| isocitrate dehydrogenase (NAD+) activity                      | GO:GO:0004449 | Idh1        |
| leucyl aminopeptidase activity                                | GO:GO:0004178 | Lap3        |
| phosphotransferase activity, alcohol group as<br>acceptor     | GO:GO:0016773 | Galk1       |
| morphogenesis                                                 | GO:GO:0009653 | Lig1        |

|                                                                                                                                                               |               |          |
|---------------------------------------------------------------------------------------------------------------------------------------------------------------|---------------|----------|
| oxidoreductase activity, acting on paired donors, with oxidation of a pair of donors resulting in the reduction of molecular oxygen to two molecules of water | GO:GO:0016717 | Scd1     |
| regulation of circadian sleep/wake cycle, sleep                                                                                                               | GO:GO:0045187 | Ada      |
| glutamate 5-kinase activity                                                                                                                                   | GO:GO:0004349 | Aldh18a1 |
| thymidine kinase activity                                                                                                                                     | GO:GO:0004797 | Tk1      |
| 5'-flap endonuclease activity                                                                                                                                 | GO:GO:0017108 | Fen1     |
| malic enzyme activity                                                                                                                                         | GO:GO:0004470 | Mod1     |
| positive regulation of nitric oxide biosynthesis                                                                                                              | GO:GO:0045429 | Ins1     |
| rRNA modification                                                                                                                                             | GO:GO:0000154 | Nol5     |
| transferase activity, transferring pentosyl groups                                                                                                            | GO:GO:0016763 | Mtap     |
| alpha DNA polymerase activity                                                                                                                                 | GO:GO:0003889 | Pola1    |
| regulation of protein secretion                                                                                                                               | GO:GO:0050708 | Ins1     |
| regulation of osteoblast differentiation                                                                                                                      | GO:GO:0045667 | Fzd1     |
| mitochondrial nucleoid                                                                                                                                        | GO:GO:0042645 | ldh1     |
| cell cycle arrest                                                                                                                                             | GO:GO:0007050 | Pa2g4    |
| synaptonemal complex                                                                                                                                          | GO:GO:0000795 | Incenp   |
| mating projection tip                                                                                                                                         | GO:GO:0043332 | Scd1     |
| WW domain binding                                                                                                                                             | GO:GO:0050699 | Wbp5     |
| inositol trisphosphate 3-kinase activity                                                                                                                      | GO:GO:0008440 | Itpka    |
| embryonic development                                                                                                                                         | GO:GO:0009790 | Birc5    |
| response to ethylene stimulus                                                                                                                                 | GO:GO:0009723 | Rcn1     |
| L-serine transport                                                                                                                                            | GO:GO:0015825 | Slc1a4   |
| inositol or phosphatidylinositol kinase activity                                                                                                              | GO:GO:0004428 | Itpka    |
| tight junction                                                                                                                                                | GO:GO:0005923 | Cldn2    |
| mRNA binding                                                                                                                                                  | GO:GO:0003729 | Hnrpab   |
| adenosylmethionine decarboxylase activity                                                                                                                     | GO:GO:0004014 | Amd1     |
| water channel activity                                                                                                                                        | GO:GO:0015250 | Aqp1     |
| cell plate                                                                                                                                                    | GO:GO:0009504 | Rangap1  |
| voltage-gated ion channel activity                                                                                                                            | GO:GO:0005244 | Kcnk3    |
| microtubule depolymerization                                                                                                                                  | GO:GO:0007019 | Stmn1    |
| DNA ligase activity                                                                                                                                           | GO:GO:0003909 | Lig1     |

|                                                                                                                                           |               |          |
|-------------------------------------------------------------------------------------------------------------------------------------------|---------------|----------|
| response to amphetamine                                                                                                                   | GO:GO:0001975 | Ppp3cb   |
| neuromuscular junction                                                                                                                    | GO:GO:0031594 | Utrn     |
| digestion                                                                                                                                 | GO:GO:0007586 | Gkn1     |
| tyrosine phosphorylation of STAT protein                                                                                                  | GO:GO:0007260 | Stat1    |
| phenylethanolamine N-methyltransferase activity                                                                                           | GO:GO:0004603 | Pnmt     |
| peroxisome                                                                                                                                | GO:GO:0005777 | Acs15    |
| aminoacyl-tRNA ligase activity                                                                                                            | GO:GO:0004812 | Wars     |
| regulation of neurotransmitter secretion                                                                                                  | GO:GO:0046928 | Park2    |
| positive regulation of vasodilation                                                                                                       | GO:GO:0045909 | Ins1     |
| response to heat                                                                                                                          | GO:GO:0009408 | Hspd1    |
| voltage-gated potassium channel activity                                                                                                  | GO:GO:0005249 | Kcnn4    |
| hormone-mediated signaling                                                                                                                | GO:GO:0009755 | Nup62    |
| elevation of cytosolic calcium ion concentration during G-protein signaling, coupled to IP3 second messenger (phospholipase C activating) | GO:GO:0051482 | Tgm2     |
| insulin receptor signaling pathway                                                                                                        | GO:GO:0008286 | Eif4ebp2 |
| vacuolar protein catabolism                                                                                                               | GO:GO:0007039 | Prc1     |
| intracellular transport                                                                                                                   | GO:GO:0046907 | Ap3m1    |
| male pronucleus                                                                                                                           | GO:GO:0001940 | Rif1     |
| nitric oxide biosynthesis                                                                                                                 | GO:GO:0006809 | Hmgb1    |
| fatty acid synthase complex                                                                                                               | GO:GO:0005835 | Mod1     |
| negative regulation of insulin receptor signaling pathway                                                                                 | GO:GO:0046627 | Socs3    |
| troponin C binding                                                                                                                        | GO:GO:0030172 | Cnn3     |
| CTP synthase activity                                                                                                                     | GO:GO:0003883 | Ctps     |
| lymphocyte differentiation                                                                                                                | GO:GO:0030098 | Hells    |
| hydrogen:potassium-exchanging ATPase activity                                                                                             | GO:GO:0008900 | Atp4a    |
| protein secretion                                                                                                                         | GO:GO:0009306 | Cxcl10   |
| microvillus                                                                                                                               | GO:GO:0005902 | Aqp1     |
| oligodendrocyte differentiation                                                                                                           | GO:GO:0048709 | Cdkn2c   |
| double-stranded RNA binding                                                                                                               | GO:GO:0003725 | Prkrip1  |
| glyoxylate cycle                                                                                                                          | GO:GO:0006097 | Idh1     |
| tubulin                                                                                                                                   | GO:GO:0045298 | Tubb5    |
| guard cell differentiation                                                                                                                | GO:GO:0010052 | Scd1     |

|                                                             |               |        |
|-------------------------------------------------------------|---------------|--------|
| IMP dehydrogenase activity                                  | GO:GO:0003938 | Impdh2 |
| S-adenosylhomocysteine metabolism                           | GO:GO:0046498 | Pnmt   |
| synaptic transmission, dopaminergic                         | GO:GO:0001963 | Park2  |
| tubulin folding                                             | GO:GO:0007021 | Cct3   |
| ribonuclease MRP complex                                    | GO:GO:0000172 | Nme1   |
| growth factor binding                                       | GO:GO:0019838 | Igfbp5 |
| ubiquitin protein ligase binding                            | GO:GO:0031625 | Aurka  |
| COPII vesicle coat                                          | GO:GO:0030127 | Sec23b |
| CTP biosynthesis                                            | GO:GO:0006241 | Nme1   |
| gluconeogenesis                                             | GO:GO:0006094 | Pck2   |
| very-long-chain fatty acid biosynthesis                     | GO:GO:0042761 | Elovl5 |
|                                                             |               |        |
| DNA (cytosine-5-)-methyltransferase activity                | GO:GO:0003886 | Dnmt1  |
| epinephrine biosynthesis                                    | GO:GO:0042418 | Pnmt   |
| tryptophan catabolism to kynurenine                         | GO:GO:0019441 | Indo   |
| G1/S-specific transcription in mitotic cell cycle           | GO:GO:0000083 | Bzw1   |
| ribosomal protein import into nucleus                       | GO:GO:0006610 | Kpnb1  |
| SRP-dependent cotranslational protein targeting to membrane | GO:GO:0006614 | Dek    |
| positive regulation of cytokine secretion                   | GO:GO:0050715 | Ins1   |
| cell organization and biogenesis                            | GO:GO:0016043 | Diap2  |
| negative regulation of protein catabolism                   | GO:GO:0042177 | Ins1   |
|                                                             |               |        |
| G1-specific transcription in mitotic cell cycle             | GO:GO:0000114 | Taf9   |
| anti-inflammatory response                                  | GO:GO:0030236 | Proc   |
| methylenetetrahydrofolate dehydrogenase (NAD+) activity     | GO:GO:0004487 | Mthfd2 |
| phosphoserine transaminase activity                         | GO:GO:0004648 | Psat1  |
| isocitrate metabolism                                       | GO:GO:0006102 | Idh1   |
| calcineurin complex                                         | GO:GO:0005955 | Rcn1   |
| regulation of signal transduction                           | GO:GO:0009966 | Nup62  |
| two-component signal transduction system (phosphorelay)     | GO:GO:0000160 | Rem2   |
| carbohydrate phosphorylation                                | GO:GO:0046835 | Galk1  |
| complement activation                                       | GO:GO:0006956 | C1qbp  |
| protein kinase C activation                                 | GO:GO:0007205 | Ppap2a |



|                                                            |               |          |
|------------------------------------------------------------|---------------|----------|
| eye morphogenesis (sensu Vertebrata)                       | GO:GO:0048593 | Ccnd1    |
| base-excision repair, gap-filling                          | GO:GO:0006287 | Pcna     |
| fertilization (sensu Metazoa)                              | GO:GO:0007338 | Nhp211   |
| zinc ion transport                                         | GO:GO:0006829 | Slc39a8  |
| response to UV-B                                           | GO:GO:0010224 | Hmgn1    |
| N-acetyltransferase activity                               | GO:GO:0008080 | Narg1    |
| RNA destabilization                                        | GO:GO:0050779 | Tnfrsf1b |
| asparagine biosynthesis                                    | GO:GO:0006529 | Asns     |
| positive regulation of cell motility                       | GO:GO:0051272 | Stmn1    |
| carboxypeptidase C activity                                | GO:GO:0004186 | Prc1     |
| epsilon DNA polymerase activity                            | GO:GO:0003893 | Pole2    |
| protein complex assembly                                   | GO:GO:0006461 | Sf3b3    |
| meiotic joint molecule formation                           | GO:GO:0000709 | Rad51    |
| acetylglucosaminyltransferase activity                     | GO:GO:0008375 | Mgat2    |
| sensory perception of sound                                | GO:GO:0007605 | Gjb2     |
| cell-substrate junction assembly                           | GO:GO:0007044 | Itga6    |
| protein catabolism                                         | GO:GO:0030163 | Psmc6    |
| protein-glutamine gamma-glutamyltransferase activity       | GO:GO:0003810 | Tgm2     |
| phosphoribosylformylglycinamide cycloligase activity       | GO:GO:0004641 | Gart     |
| visual perception                                          | GO:GO:0007601 | Clns1a   |
| water transport                                            | GO:GO:0006833 | Aqp1     |
| peptidyl-serine phosphorylation                            | GO:GO:0018105 | Pbk      |
| regulation of protein import into nucleus                  | GO:GO:0042306 | Nolc1    |
| DNA topoisomerase complex (ATP-hydrolyzing)                | GO:GO:0009330 | Top2a    |
| hemostasis                                                 | GO:GO:0007599 | Gp1ba    |
| chromatin remodeling complex                               | GO:GO:0016585 | Actl6a   |
| regulation of cell redox homeostasis                       | GO:GO:0030503 | Apex1    |
| rRNA methyltransferase activity                            | GO:GO:0008649 | Nol5     |
| positive regulation of abscisic acid mediated signaling    | GO:GO:0009789 | Rcn1     |
| double-stranded DNA specific exodeoxyribonuclease activity | GO:GO:0008309 | Fen1     |
| isocitrate dehydrogenase (NADP+) activity                  | GO:GO:0004450 | Idh1     |

|                                                                                |               |         |
|--------------------------------------------------------------------------------|---------------|---------|
| establishment of mitotic spindle localization                                  | GO:GO:0040001 | Nusap1  |
| inner kinetochore of condensed chromosome                                      | GO:GO:0000939 | Orc2l   |
| endocytosis                                                                    | GO:GO:0006897 | Scd1    |
| vacuole                                                                        | GO:GO:0005773 | Entpd4  |
| positive regulation of long-term neuronal synaptic plasticity                  | GO:GO:0048170 | Ephb2   |
| purine base biosynthesis                                                       | GO:GO:0009113 | Gart    |
| GDP binding                                                                    | GO:GO:0019003 | ligp1   |
| lymphocyte proliferation                                                       | GO:GO:0046651 | Impdh2  |
| integrin complex                                                               | GO:GO:0008305 | Itga6   |
| tRNA splicing                                                                  | GO:GO:0006388 | Lig1    |
| transcription initiation from mitochondrial promoter                           | GO:GO:0006391 | Tfam    |
| superoxide metabolism                                                          | GO:GO:0006801 | Scd1    |
| phosphoribosylglycinamide formyltransferase activity                           | GO:GO:0004644 | Gart    |
| double-strand break repair via synthesis-dependent strand annealing            | GO:GO:0045003 | Rad51   |
| negative regulation of protein kinase activity                                 | GO:GO:0006469 | Prkrip1 |
| activation of NF-kappaB transcription factor                                   | GO:GO:0051092 | Tgm2    |
| alpha-glucan biosynthesis                                                      | GO:GO:0030979 | Pck2    |
| alpha-1,6-mannosylglycoprotein 2-beta-N-acetylglucosaminyltransferase activity | GO:GO:0008455 | Mgat2   |
| Rho GTPase binding                                                             | GO:GO:0017048 | Diap2   |
| sphingolipid biosynthesis                                                      | GO:GO:0030148 | Fen1    |
| negative regulation of microtubule polymerization                              | GO:GO:0031115 | Stmn1   |
| DNA ligase (ATP) activity                                                      | GO:GO:0003910 | Lig1    |
| mRNA editing                                                                   | GO:GO:0006381 | Hnrpab  |
| smoothened signaling pathway                                                   | GO:GO:0007224 | Boc     |
| adenosine metabolism                                                           | GO:GO:0046085 | Ada     |
| histone binding                                                                | GO:GO:0042393 | Asf1b   |
| mitotic metaphase/anaphase transition                                          | GO:GO:0007091 | Ccdc5   |
| pentose-phosphate shunt                                                        | GO:GO:0006098 | Rpe     |

|                                                                              |               |               |
|------------------------------------------------------------------------------|---------------|---------------|
| DNA primase activity                                                         | GO:GO:0003896 | Prim1         |
| uracil DNA N-glycosylase activity                                            | GO:GO:0004844 | Tdg           |
| negative regulation of angiogenesis                                          | GO:GO:0016525 | Amot          |
| branching morphogenesis of a tube                                            | GO:GO:0048754 | Timeless      |
| regulation of Cdc42 GTPase activity                                          | GO:GO:0043088 | Scd1          |
| negative regulation of mitotic<br>metaphase/anaphase transition              | GO:GO:0045841 | Mad211        |
| mitotic G2 checkpoint                                                        | GO:GO:0007095 | Cdc2a         |
| actin filament binding                                                       | GO:GO:0051015 | Utrn          |
| glucose transport                                                            | GO:GO:0015758 | Ins1          |
| negative regulation of actin filament<br>polymerization                      | GO:GO:0030837 | Proc          |
| dolichyl-phosphate-mannose-protein<br>mannosyltransferase activity           | GO:GO:0004169 | Pomt1         |
| mammary gland development                                                    | GO:GO:0030879 | Nme1          |
| calcium-dependent protein serine/threonine<br>phosphatase regulator activity | GO:GO:0008597 | Rcn1          |
| cysteine protease inhibitor activity                                         | GO:GO:0004869 | Birc5         |
| sex determination                                                            | GO:GO:0007530 | 2010012C16Rik |
| snRNP protein import into nucleus                                            | GO:GO:0006608 | Nol5          |

|          |          |           |         |         |           |          |          |         |         |          |         |          |
|----------|----------|-----------|---------|---------|-----------|----------|----------|---------|---------|----------|---------|----------|
| Anp32e   | Apex1    | Api5      | Apobec3 | Aspm    | Aurkb     | B230120H | BC027344 | Bcl11a  | Bclaf1  | Birc5    | Blmh    | Brca2    |
| Bclaf1   | Birc5    | Boc       | Brca2   | Bysl    | C1qbp     | Car8     | Cbx5     | Ccna2   | Ccnb1   | Ccnb2    | Ccnd1   | Cct3     |
| Cct3     | Cdc2a    | Cdc6      | Cdc7    | Cdk4    | Chek1     | Chek2    | Cstf2    | Ddx39   | Diap2   | Eftud2   | Ephb2   | Ephb3    |
| Dnajc2   | Dnmt1    | E2f8      | Fancm   | Fen1    | H1f0      | H2afz    | Hells    | Hmga2   | Hmgb1   | Hmgn1    | Hnrpab  | Hnrpdl   |
| Bcl11a   | Birc5    | Blmh      | Brca2   | Car8    | Ccna2     | Cct3     | Cdc6     | Cenpf   | Ect2    | Eif4e2   | Eif4g1  | Eif5a    |
| Atrn     | Boc      | Car12     | Cd24a   | Cd44    | Cldn2     | Dek      | Eif1a    | Entpd4  | Ephb2   | Ephb3    | Ffar2   | Figl1    |
| Bub1b    | Cct3     | Cdc2a     | Cdc6    | Cdc7    | Cdk4      | Chek1    | Chek2    | Ddx39   | Ephb2   | Ephb3    | Fancm   | Figl1    |
| Boc      | Car12    | Cd44      | Cldn2   | Elovl5  | Entpd4    | Ephb2    | Ephb3    | Ffar2   | Fzd1    | Fzd7     | Gjb2    | Gp1ba    |
| B230120H | BC027344 | Bcl11a    | Birc5   | Car12   | Car8      | Chek2    | Cnot6    | Dbf4    | Dnmt1   | Fads1    | Fanci   | Impdh2   |
| Brrn1    | Bub1b    | Ccdc5     | Ccna2   | Ccnb1   | Ccnb1-rs1 | Ccnb2    | Ccnd1    | Ccne2   | Cdc25b  | Cdc2a    | Cdc6    | Cdc7     |
| Cdc2a    | Cdc7     | Cdk4      | Chek1   | Chek2   | Diap2     | Dnmt1    | Ephb2    | Ephb3   | Galk1   | Gart     | Itпка   | Lats2    |
| Eif1a    | Eif5a    | Fancm     | Fen1    | Gpatc4  | Gtf2h2    | Hells    | Hnrpa1   | Hnrpab  | Hnrpdl  | Lap3     | Mcm2    | Mcm3     |
| Asns     | Aspm     | Blmh      | Bxdc1   | Bysl    | Ccdc5     | Cdc7     | Cdk5rap2 | Cpsf2   | Cstf2   | Eif4ebp2 | Gbp2    | ligp1    |
| Cnot6    | Dnmt1    | E2f8      | Hmga2   | Hmgb1   | Hnrpab    | Hod      | Hoxa11   | Hoxa9   | Mcm2    | Mcm3     | Mcm5    | Mcm6     |
| Hmga2    | Hnrpab   | Hod       | Hoxa11  | Hoxa9   | Mcm2      | Mcm3     | Mcm5     | Mcm6    | Mcm7    | Narg1    | Neurog3 | Nono     |
| Cxcl10   | Cxcl11   | Cxcl9     | Ephb3   | Ffar2   | Fzd7      | Gkn1     | Grem1    | Hdgf    | Hmgb1   | Igfbp5   | Ins1    | Kap      |
| Ccdc5    | Cdk5rap2 | Ckap4     | Cpsf2   | Gas5    | Gnl3      | ligp2    | Kpnb1    | Lin9    | Mki67ip | Nola1    | Nudcd2  | Nusap1   |
| Car8     | Cdc6     | Dbf4      | Dnmt1   | Fanci   | Gtf2h2    | Kpnb1    | Lap3     | Lyar    | Mcm2    | Park2    | Pck2    | Pola1    |
| Clns1a   | Eif1a    | Gjb2      | Hmgb1   | Hnrpa1  | Kcnk3     | Kcnn4    | Kpnb1    | Lman1   | Mtm1    | Nup107   | Nup155  | Nup37    |
| Eif4e2   | Eif4g1   | Gbp2      | Hnrpa1  | Hnrpab  | Hnrpdl    | ldh1     | Mki67ip  | Ncl     | Nhp2l1  | Nol5a    | Nola1   | Nola2    |
| Cdk5rap2 | Cenpf    | Cnn1      | Cpsf2   | Ctnnal1 | Gmnn      | Gnl3     | Hrasls   | Kpnb1   | Lin9    | Mad2l1   | Nudcd2  | Rad51ap1 |
| Ccnd1    | Cdc2a    | Cdc7      | Cdk4    | Cdkn2c  | Chek1     | Chek2    | Cks1b    | Dbf4    | Diap2   | Ephb2    | Ephb3   | Galk1    |
| Ccna2    | Ccnb1    | Ccnb2     | Ccnd1   | Ccne2   | Cdc25b    | Cdc2a    | Cdc6     | Cdc7    | Cdca5   | Cdk4     | Cenpf   | Cep55    |
| Mcm2     | Mcm3     | Mcm5      | Mcm6    | Mcm7    | Nap1l1    | Orc2l    | Pcna     | Pola1   | Pold3   | Pole     | Pole2   | Prim1    |
| Cnot6    | Ddx39    | Entpd4    | Fancm   | Fen1    | ligp1     | Isg20l1  | Lap3     | Mthfd2  | Mtm1    | Pa2g4    | Pole    | Ppap2a   |
| Lap3     | Nedd4    | Nras      | Park2   | Pitpnm2 | Racgap1   | Rad51    | Ran      | Recc1   | Rexo2   | Rpl7l1   | Rps6    | Smarcc1  |
| Ccna2    | Ccnb1    | Ccnb1-rs1 | Ccnb2   | Cdc25b  | Cdc2a     | Cdc6     | Cdca5    | Cdk4    | Cep55   | Incenp   | Kif22   | Kif2c    |
| Gtf2h2   | Lig1     | Nono      | Pcna    | Pole    | Pole2     | Rad51    | Rad51ap1 | Rad54l  | Recc1   | Rfc5     | Rpa1    | Rpa2     |
| Igtp     | Indo     | Mcm2      | Mcm3    | Mcm5    | Mcm6      | Nedd4    | Nucb2    | Nup107  | Psmc6   | Rfc2     | Rfc4    | Rfc5     |
| Ccne2    | Cdk4     | Ect2      | Gkn1    | Gmnn    | Gnl3      | Mcm5     | Nek2     | Nhp2l1  | Nras    | Pcna     | Ran     | Skp2     |
| Fzd1     | Fzd7     | Hmmr      | Itga6   | Lgr5    | Lin9      | Narg1    | Neto1    | Olfr157 | Pprc1   | Ptpro    | Strap   | Tnfrsf1b |
| Hspe1    | Kif11    | Lap3      | Lrg1    | Mthfd2  | Mtm1      | Pck2     | Polr3h   | Rexo2   | Rpa2    | Shmt1    | Shmt2   | Tfam     |
| Cdc7     | Cdk4     | Chek1     | Chek2   | Dbf4    | Ephb2     | Ephb3    | Lats2    | Melk    | Nek2    | Pbk      | Pck2    | Plk4     |
| Chek1    | Chek2    | Dbf4      | Ephb2   | Ephb3   | Lats2     | Melk     | Nek2     | Nup62   | Pbk     | Plk4     | Tgm2    | Wnk1     |
| Lman1    | Nucb2    | P4hb      | Park2   | Pomt1   | Prc1      | Rcn1     | Scd1     | Sec23b  | Set     | Tmed5    | Txndc5  |          |
| Igfbp5   | Itпка    | Lgr5      | Ppap2a  | Ppp2r2b | Racgap1   | Rangap1  | Socs3    | Stat1   | Utrn    | Wwp1     |         |          |
| Mcm10    | Mcm2     | Mcm3      | Mcm5    | Mcm6    | Mcm7      | Nup62    | Rpa1     | Smarcc1 | Suz12   | Tmpo     |         |          |



|          |        |
|----------|--------|
| Rps6     | Wars   |
| Syp1     | Syt9   |
| Txndc5   | Uble1b |
| Rpl711   | Ssrp1  |
| Xpo1     | Xpo4   |
| Phgdh    | Psat1  |
| Utrn     |        |
| Tdg      |        |
| Rrs1     |        |
| Tnfrsf1b |        |
| Ran      |        |
| Mcm7     |        |

|                                              |               | Colon TA | TA Avg   | SC Avg   | DC Avg   |
|----------------------------------------------|---------------|----------|----------|----------|----------|
| nucleus                                      | GO:GO:0005634 | 0.466019 | 0.457368 | 0.348404 | 0.219441 |
| protein binding                              | GO:GO:0005515 | 0.300971 | 0.313872 | 0.311195 | 0.302361 |
| nucleotide binding                           | GO:GO:0000166 | 0.194175 | 0.201331 | 0.151085 | 0.124064 |
| DNA binding                                  | GO:GO:0003677 | 0.177184 | 0.198481 | 0.144077 | 0.094037 |
| cytoplasm                                    | GO:GO:0005737 | 0.157767 | 0.163231 | 0.158419 | 0.14562  |
| membrane                                     | GO:GO:0016020 | 0.145631 | 0.148839 | 0.226493 | 0.317531 |
| ATP binding                                  | GO:GO:0005524 | 0.143204 | 0.144868 | 0.111496 | 0.100783 |
| integral to membrane                         | GO:GO:0016021 | 0.135922 | 0.1184   | 0.192388 | 0.271179 |
| metal ion binding                            | GO:GO:0046872 | 0.128641 | 0.111287 | 0.137616 | 0.136152 |
| cell cycle                                   | GO:GO:0007049 | 0.118932 | 0.092444 | 0.045123 | 0.031116 |
| transferase activity                         | GO:GO:0016740 | 0.116505 | 0.11     | 0.100952 | 0.105465 |
| nucleic acid binding                         | GO:GO:0003676 | 0.114078 | 0.134093 | 0.098443 | 0.041588 |
| cellular component unknown                   | GO:GO:0008372 | 0.114078 | 0.112379 | 0.1398   | 0.107205 |
| regulation of transcription, DNA-dependent   | GO:GO:0006355 | 0.106796 | 0.121536 | 0.136303 | 0.088038 |
| transcription                                | GO:GO:0006350 | 0.104369 | 0.104542 | 0.112522 | 0.07041  |
| extracellular space                          | GO:GO:0005615 | 0.099515 | 0.084797 | 0.110147 | 0.173148 |
| biological process unknown                   | GO:GO:0000004 | 0.092233 | 0.091496 | 0.102027 | 0.084367 |
| zinc ion binding                             | GO:GO:0008270 | 0.092233 | 0.086943 | 0.107604 | 0.09178  |
| transport                                    | GO:GO:0006810 | 0.089806 | 0.103749 | 0.10595  | 0.118486 |
| RNA binding                                  | GO:GO:0003723 | 0.087379 | 0.116647 | 0.079098 | 0.024458 |
| molecular function unknown                   | GO:GO:0005554 | 0.084951 | 0.105675 | 0.098758 | 0.077548 |
| kinase activity                              | GO:GO:0016301 | 0.082524 | 0.074829 | 0.058592 | 0.070805 |
| cell division                                | GO:GO:0051301 | 0.07767  | 0.068847 | 0.022291 | 0.015506 |
| DNA replication                              | GO:GO:0006260 | 0.07767  | 0.069401 | 0.017939 | 0.008719 |
| hydrolase activity                           | GO:GO:0016787 | 0.075243 | 0.082868 | 0.091108 | 0.107355 |
| intracellular                                | GO:GO:0005622 | 0.065534 | 0.079157 | 0.097598 | 0.067172 |
| mitosis                                      | GO:GO:0007067 | 0.063107 | 0.051115 | 0.018903 | 0.012506 |
| DNA repair                                   | GO:GO:0006281 | 0.058252 | 0.04165  | 0.02013  | 0.009944 |
| cytosol                                      | GO:GO:0005829 | 0.058252 | 0.060522 | 0.06775  | 0.054648 |
| regulation of progression through cell cycle | GO:GO:0000074 | 0.053398 | 0.047919 | 0.036325 | 0.028422 |
| receptor activity                            | GO:GO:0004872 | 0.050971 | 0.048779 | 0.06661  | 0.08866  |
| mitochondrion                                | GO:GO:0005739 | 0.050971 | 0.078872 | 0.092153 | 0.073037 |
| protein amino acid phosphorylation           | GO:GO:0006468 | 0.050971 | 0.050179 | 0.041236 | 0.049824 |
| protein serine/threonine kinase activity     | GO:GO:0004674 | 0.048544 | 0.047556 | 0.034339 | 0.044149 |
| endoplasmic reticulum                        | GO:GO:0005783 | 0.046117 | 0.032289 | 0.052649 | 0.057424 |
| signal transduction                          | GO:GO:0007165 | 0.043689 | 0.037929 | 0.065944 | 0.087629 |
| chromatin binding                            | GO:GO:0003682 | 0.043689 | 0.039491 | 0.018223 | 0.009385 |
| protein kinase activity                      | GO:GO:0004672 | 0.043689 | 0.047032 | 0.036175 | 0.045803 |
| oxidoreductase activity                      | GO:GO:0016491 | 0.041262 | 0.040638 | 0.04932  | 0.056252 |
| mRNA processing                              | GO:GO:0006397 | 0.041262 | 0.066981 | 0.02755  | 0.005828 |
| response to DNA damage stimulus              | GO:GO:0006974 | 0.041262 | 0.027096 | 0.015049 | 0.010346 |
| development                                  | GO:GO:0007275 | 0.038835 | 0.039529 | 0.05272  | 0.048514 |
| ribonucleoprotein complex                    | GO:GO:0030529 | 0.038835 | 0.056916 | 0.040612 | 0.012348 |
| magnesium ion binding                        | GO:GO:0000287 | 0.038835 | 0.025365 | 0.021921 | 0.027666 |
| nucleolus                                    | GO:GO:0005730 | 0.036408 | 0.043946 | 0.023695 | 0.008851 |
| GTP binding                                  | GO:GO:0005525 | 0.036408 | 0.018856 | 0.03035  | 0.030533 |
| integral to plasma membrane                  | GO:GO:0005887 | 0.036408 | 0.040163 | 0.045645 | 0.073951 |
| DNA replication initiation                   | GO:GO:0006270 | 0.033981 | 0.019153 | 0.004542 | 0.002233 |
| cell proliferation                           | GO:GO:0008283 | 0.033981 | 0.036606 | 0.026471 | 0.024702 |
| plasma membrane                              | GO:GO:0005886 | 0.031553 | 0.024109 | 0.053374 | 0.088638 |

|                                                                      |               |          |          |          |          |
|----------------------------------------------------------------------|---------------|----------|----------|----------|----------|
| protein transport                                                    | GO:GO:0015031 | 0.031553 | 0.026614 | 0.040245 | 0.035907 |
| ligase activity                                                      | GO:GO:0016874 | 0.031553 | 0.027034 | 0.023376 | 0.012945 |
| protein-tyrosine kinase activity                                     | GO:GO:0004713 | 0.029126 | 0.03482  | 0.026241 | 0.032423 |
| immune response                                                      | GO:GO:0006955 | 0.029126 | 0.008019 | 0.018963 | 0.037667 |
| transcription factor activity                                        | GO:GO:0003700 | 0.029126 | 0.051718 | 0.068735 | 0.057125 |
| nuclear mRNA splicing, via spliceosome                               | GO:GO:0000398 | 0.029126 | 0.047055 | 0.019689 | 0.003957 |
| regulation of transcription                                          | GO:GO:0045449 | 0.029126 | 0.031442 | 0.030295 | 0.024194 |
| extracellular region                                                 | GO:GO:0005576 | 0.029126 | 0.011868 | 0.023539 | 0.046488 |
| intracellular signaling cascade                                      | GO:GO:0007242 | 0.029126 | 0.024153 | 0.026258 | 0.037685 |
| nucleoside-triphosphatase activity                                   | GO:GO:0017111 | 0.029126 | 0.029744 | 0.012156 | 0.010313 |
| chromatin                                                            | GO:GO:0000785 | 0.026699 | 0.022968 | 0.01135  | 0.005677 |
| soluble fraction                                                     | GO:GO:0005625 | 0.026699 | 0.013667 | 0.018935 | 0.020625 |
| ubiquitin cycle                                                      | GO:GO:0006512 | 0.026699 | 0.025554 | 0.030847 | 0.017896 |
| protein folding                                                      | GO:GO:0006457 | 0.026699 | 0.03014  | 0.025433 | 0.015824 |
| calcium ion binding                                                  | GO:GO:0005509 | 0.026699 | 0.033863 | 0.04372  | 0.065329 |
| electron transport                                                   | GO:GO:0006118 | 0.026699 | 0.018012 | 0.029154 | 0.031308 |
| chromosome                                                           | GO:GO:0005694 | 0.026699 | 0.030247 | 0.012323 | 0.006327 |
| catalytic activity                                                   | GO:GO:0003824 | 0.026699 | 0.029631 | 0.031557 | 0.035198 |
| nucleotidyltransferase activity                                      | GO:GO:0016779 | 0.024272 | 0.015574 | 0.010206 | 0.007585 |
| unfolded protein binding                                             | GO:GO:0051082 | 0.024272 | 0.026532 | 0.019002 | 0.011294 |
| GTPase activity                                                      | GO:GO:0003924 | 0.024272 | 0.009841 | 0.017669 | 0.020451 |
| S phase of mitotic cell cycle                                        | GO:GO:0000084 | 0.024272 | 0.022078 | 0.005386 | 0.002194 |
| microtubule                                                          | GO:GO:0005874 | 0.024272 | 0.021054 | 0.014634 | 0.014663 |
| iron ion binding                                                     | GO:GO:0005506 | 0.024272 | 0.01513  | 0.018524 | 0.023989 |
| protein biosynthesis                                                 | GO:GO:0006412 | 0.021845 | 0.055458 | 0.045138 | 0.014561 |
| transporter activity                                                 | GO:GO:0005215 | 0.021845 | 0.022106 | 0.019984 | 0.02713  |
| electron carrier activity                                            | GO:GO:0009055 | 0.021845 | 0.01178  | 0.012659 | 0.011639 |
| transcription regulator activity                                     | GO:GO:0030528 | 0.021845 | 0.018973 | 0.018689 | 0.012604 |
| binding                                                              | GO:GO:0005488 | 0.021845 | 0.032622 | 0.038137 | 0.031429 |
| metabolism                                                           | GO:GO:0008152 | 0.021845 | 0.019098 | 0.03087  | 0.035249 |
| cytoskeleton                                                         | GO:GO:0005856 | 0.019417 | 0.024433 | 0.032518 | 0.048527 |
| carbohydrate metabolism                                              | GO:GO:0005975 | 0.019417 | 0.010636 | 0.015228 | 0.01998  |
| rRNA processing                                                      | GO:GO:0006364 | 0.019417 | 0.027157 | 0.012408 | 0.005954 |
| inflammatory response                                                | GO:GO:0006954 | 0.019417 | 0.006195 | 0.009305 | 0.018928 |
| cell adhesion                                                        | GO:GO:0007155 | 0.019417 | 0.018506 | 0.033729 | 0.048822 |
| pre-replicative complex                                              | GO:GO:0005656 | 0.019417 | 0.011886 | 0.00278  | 0.001124 |
| DNA-directed RNA polymerase activity                                 | GO:GO:0003899 | 0.01699  | 0.011276 | 0.004862 | 0.002147 |
| apoptosis                                                            | GO:GO:0006915 | 0.01699  | 0.018216 | 0.030008 | 0.029604 |
| DNA replication origin binding                                       | GO:GO:0003688 | 0.01699  | 0.008899 | 0.002582 | 0.000914 |
| DNA-dependent ATPase activity                                        | GO:GO:0008094 | 0.01699  | 0.012532 | 0.002493 | 0.001255 |
| cyclin-dependent protein kinase regulator activity                   | GO:GO:0016538 | 0.01699  | 0.011036 | 0.00428  | 0.004099 |
| condensed chromosome                                                 | GO:GO:0000793 | 0.01699  | 0.013782 | 0.00395  | 0.002328 |
| chromosome, pericentric region                                       | GO:GO:0000775 | 0.01699  | 0.013728 | 0.003172 | 0.0016   |
| negative regulation of transcription from RNA polymerase II promoter | GO:GO:0000122 | 0.01699  | 0.026017 | 0.015306 | 0.011971 |
| spliceosome complex                                                  | GO:GO:0005681 | 0.01699  | 0.025984 | 0.012528 | 0.003431 |
| nuclear pore                                                         | GO:GO:0005643 | 0.01699  | 0.016718 | 0.008809 | 0.002974 |
| peptidase activity                                                   | GO:GO:0008233 | 0.01699  | 0.020011 | 0.030161 | 0.039733 |
| membrane fraction                                                    | GO:GO:0005624 | 0.01699  | 0.021208 | 0.028433 | 0.042672 |



|                                                      |               |          |          |          |          |
|------------------------------------------------------|---------------|----------|----------|----------|----------|
| pre-replicative complex formation and maintenance    | GO:GO:0006267 | 0.01699  | 0.009829 | 0.002489 | 0.000949 |
| proteolysis                                          | GO:GO:0006508 | 0.014563 | 0.02415  | 0.031696 | 0.04158  |
| negative regulation of cell proliferation            | GO:GO:0008285 | 0.014563 | 0.017772 | 0.015868 | 0.015581 |
| chemotaxis                                           | GO:GO:0006935 | 0.014563 | 0.005733 | 0.006965 | 0.009633 |
| protein heterodimerization activity                  | GO:GO:0046982 | 0.014563 | 0.019162 | 0.015213 | 0.014709 |
| protein modification                                 | GO:GO:0006464 | 0.014563 | 0.010001 | 0.0167   | 0.009585 |
| organ morphogenesis                                  | GO:GO:0009887 | 0.014563 | 0.013665 | 0.013337 | 0.014322 |
| positive regulation of cell proliferation            | GO:GO:0008284 | 0.014563 | 0.016096 | 0.013781 | 0.011403 |
| ion transport                                        | GO:GO:0006811 | 0.014563 | 0.020019 | 0.020774 | 0.035616 |
| ribosome biogenesis                                  | GO:GO:0007046 | 0.014563 | 0.024197 | 0.015802 | 0.007897 |
| helicase activity                                    | GO:GO:0004386 | 0.014563 | 0.014996 | 0.014466 | 0.004112 |
| mRNA export from nucleus                             | GO:GO:0006406 | 0.014563 | 0.021335 | 0.005754 | 0.001456 |
| ubiquitin-dependent protein catabolism               | GO:GO:0006511 | 0.014563 | 0.014329 | 0.020202 | 0.010354 |
| calmodulin binding                                   | GO:GO:0005516 | 0.014563 | 0.014304 | 0.007258 | 0.012352 |
| methyltransferase activity                           | GO:GO:0008168 | 0.014563 | 0.011061 | 0.007105 | 0.003107 |
| cytokine activity                                    | GO:GO:0005125 | 0.014563 | 0.005494 | 0.009143 | 0.013756 |
| translation initiation factor activity               | GO:GO:0003743 | 0.014563 | 0.009698 | 0.01144  | 0.003914 |
| small GTPase mediated signal transduction            | GO:GO:0007264 | 0.014563 | 0.007722 | 0.017317 | 0.021412 |
| actin binding                                        | GO:GO:0003779 | 0.014563 | 0.023362 | 0.021952 | 0.03071  |
| DNA recombination                                    | GO:GO:0006310 | 0.014563 | 0.010113 | 0.00455  | 0.002341 |
| single-stranded DNA binding                          | GO:GO:0003697 | 0.014563 | 0.018577 | 0.005994 | 0.003516 |
| kinetochore                                          | GO:GO:0000776 | 0.014563 | 0.009695 | 0.004042 | 0.002502 |
| cell-cell signaling                                  | GO:GO:0007267 | 0.014563 | 0.009102 | 0.010898 | 0.017409 |
| amino acid biosynthesis                              | GO:GO:0008652 | 0.012136 | 0.004182 | 0.002472 | 0.001589 |
| regulation of cell growth                            | GO:GO:0001558 | 0.012136 | 0.009281 | 0.010474 | 0.006151 |
| ribosome                                             | GO:GO:0005840 | 0.012136 | 0.034452 | 0.025405 | 0.007028 |
| nucleosome assembly                                  | GO:GO:0006334 | 0.012136 | 0.015044 | 0.007032 | 0.005044 |
| transcription factor complex                         | GO:GO:0005667 | 0.012136 | 0.019594 | 0.025675 | 0.020085 |
| cell surface receptor linked signal transduction     | GO:GO:0007166 | 0.012136 | 0.005185 | 0.009857 | 0.015905 |
| isomerase activity                                   | GO:GO:0016853 | 0.012136 | 0.015708 | 0.015906 | 0.0096   |
| G-protein coupled receptor protein signaling pathway | GO:GO:0007186 | 0.012136 | 0.009821 | 0.020213 | 0.028267 |
| ATP-dependent helicase activity                      | GO:GO:0008026 | 0.012136 | 0.013277 | 0.012714 | 0.003729 |
| nucleocytoplasmic transport                          | GO:GO:0006913 | 0.012136 | 0.007882 | 0.003366 | 0.001289 |
| cytokinesis                                          | GO:GO:0000910 | 0.012136 | 0.008474 | 0.005286 | 0.005501 |
| nuclease activity                                    | GO:GO:0004518 | 0.012136 | 0.014651 | 0.004393 | 0.002808 |
| porin activity                                       | GO:GO:0015288 | 0.012136 | 0.007482 | 0.002148 | 0.001565 |
| cysteine-type endopeptidase activity                 | GO:GO:0004197 | 0.012136 | 0.007162 | 0.010523 | 0.010849 |
| small nucleolar ribonucleoprotein complex            | GO:GO:0005732 | 0.012136 | 0.010001 | 0.003939 | 0.000359 |
| sugar binding                                        | GO:GO:0005529 | 0.012136 | 0.002827 | 0.006367 | 0.010593 |
| ubiquitin-protein ligase activity                    | GO:GO:0004842 | 0.012136 | 0.011675 | 0.013568 | 0.006796 |
| chromatin modification                               | GO:GO:0016568 | 0.012136 | 0.012316 | 0.012964 | 0.004923 |
| outer membrane                                       | GO:GO:0019867 | 0.012136 | 0.008085 | 0.00487  | 0.003251 |
| DNA-directed DNA polymerase activity                 | GO:GO:0003887 | 0.012136 | 0.011203 | 0.003988 | 0.002269 |
| MCM complex                                          | GO:GO:0042555 | 0.012136 | 0.010592 | 0.002186 | 0.000949 |
| DNA helicase activity                                | GO:GO:0003678 | 0.012136 | 0.012125 | 0.003922 | 0.001643 |
| protein amino acid dephosphorylation                 | GO:GO:0006470 | 0.012136 | 0.01223  | 0.011829 | 0.01192  |
| 3'-5' exonuclease activity                           | GO:GO:0008408 | 0.012136 | 0.009342 | 0.002535 | 0.001009 |
| DNA unwinding during replication                     | GO:GO:0006268 | 0.012136 | 0.013375 | 0.003865 | 0.00186  |

|                                                             |               |          |          |          |          |
|-------------------------------------------------------------|---------------|----------|----------|----------|----------|
| structural molecule activity                                | GO:GO:0005198 | 0.012136 | 0.022408 | 0.021164 | 0.033072 |
| GTPase activator activity                                   | GO:GO:0005096 | 0.012136 | 0.007765 | 0.009011 | 0.011412 |
| meiosis                                                     | GO:GO:0007126 | 0.012136 | 0.009004 | 0.003928 | 0.00264  |
| protein complex                                             | GO:GO:0043234 | 0.012136 | 0.018479 | 0.013733 | 0.00853  |
| regulation of translation                                   | GO:GO:0006445 | 0.012136 | 0.014403 | 0.006848 | 0.004994 |
| Golgi stack                                                 | GO:GO:0005795 | 0.012136 | 0.005265 | 0.011831 | 0.014315 |
| nuclear envelope                                            | GO:GO:0005635 | 0.012136 | 0.008696 | 0.005115 | 0.006552 |
| exonuclease activity                                        | GO:GO:0004527 | 0.012136 | 0.012169 | 0.002637 | 0.001181 |
| signal transducer activity                                  | GO:GO:0004871 | 0.012136 | 0.014095 | 0.027294 | 0.036522 |
| RNA splicing                                                | GO:GO:0008380 | 0.012136 | 0.008369 | 0.006501 | 0.002436 |
| spindle                                                     | GO:GO:0005819 | 0.012136 | 0.010538 | 0.006439 | 0.005221 |
| DNA replication factor C complex                            | GO:GO:0005663 | 0.012136 | 0.007791 | 0.001905 | 0.000333 |
| chromosome segregation                                      | GO:GO:0007059 | 0.009709 | 0.012489 | 0.004992 | 0.002846 |
| replication fork                                            | GO:GO:0005657 | 0.009709 | 0.012835 | 0.004203 | 0.001113 |
| negative regulation of transcription                        | GO:GO:0016481 | 0.009709 | 0.010777 | 0.008473 | 0.007191 |
| chromatin remodeling                                        | GO:GO:0006338 | 0.009709 | 0.00726  | 0.004457 | 0.00301  |
| microtubule binding                                         | GO:GO:0008017 | 0.009709 | 0.013251 | 0.005961 | 0.005722 |
| cellular physiological process                              | GO:GO:0050875 | 0.009709 | 0.010753 | 0.012606 | 0.01275  |
| microtubule-based process                                   | GO:GO:0007017 | 0.009709 | 0.007039 | 0.00583  | 0.006831 |
| nervous system development                                  | GO:GO:0007399 | 0.009709 | 0.020992 | 0.022294 | 0.025039 |
| transcription factor binding                                | GO:GO:0008134 | 0.009709 | 0.006559 | 0.008712 | 0.00694  |
| DNA-dependent DNA replication                               | GO:GO:0006261 | 0.009709 | 0.0042   | 0.001122 | 0.001043 |
| protein targeting                                           | GO:GO:0006605 | 0.009709 | 0.009009 | 0.011687 | 0.008288 |
| defense response                                            | GO:GO:0006952 | 0.009709 | 0.01175  | 0.0104   | 0.018256 |
| chemokine activity                                          | GO:GO:0008009 | 0.009709 | 0.00202  | 0.001858 | 0.003743 |
| condensed nuclear chromosome                                | GO:GO:0000794 | 0.009709 | 0.005716 | 0.000991 | 0.000852 |
| midbody                                                     | GO:GO:0030496 | 0.009709 | 0.007488 | 0.000903 | 0.000801 |
| cell differentiation                                        | GO:GO:0030154 | 0.009709 | 0.030501 | 0.03031  | 0.030262 |
| cytoskeleton organization and biogenesis                    | GO:GO:0007010 | 0.009709 | 0.009103 | 0.012018 | 0.016721 |
| RNA processing                                              | GO:GO:0006396 | 0.009709 | 0.014625 | 0.009449 | 0.002132 |
| ER-Golgi intermediate compartment                           | GO:GO:0005793 | 0.009709 | 0.003855 | 0.002499 | 0.003301 |
| chromosome organization and biogenesis<br>(sensu Eukaryota) | GO:GO:0007001 | 0.009709 | 0.011251 | 0.006046 | 0.004612 |
| centrosome                                                  | GO:GO:0005813 | 0.009709 | 0.008474 | 0.008348 | 0.005161 |
| potassium ion binding                                       | GO:GO:0030955 | 0.009709 | 0.012593 | 0.004978 | 0.006563 |
| nucleoplasm                                                 | GO:GO:0005654 | 0.009709 | 0.013695 | 0.007478 | 0.003555 |
| axon guidance                                               | GO:GO:0007411 | 0.009709 | 0.009342 | 0.006272 | 0.007798 |
| lyase activity                                              | GO:GO:0016829 | 0.009709 | 0.011459 | 0.010982 | 0.010148 |
| one-carbon compound metabolism                              | GO:GO:0006730 | 0.009709 | 0.004299 | 0.003983 | 0.00304  |
| chromosome condensation                                     | GO:GO:0030261 | 0.009709 | 0.006337 | 0.002286 | 0.00247  |
| DNA metabolism                                              | GO:GO:0006259 | 0.009709 | 0.011923 | 0.004425 | 0.002964 |
| DNA clamp loader activity                                   | GO:GO:0003689 | 0.009709 | 0.008216 | 0.001443 | 0.0006   |
| transcriptional repressor activity                          | GO:GO:0016564 | 0.009709 | 0.015814 | 0.012245 | 0.009855 |
| intracellular protein transport                             | GO:GO:0006886 | 0.009709 | 0.015549 | 0.028462 | 0.028435 |
| sequence-specific DNA binding                               | GO:GO:0043565 | 0.009709 | 0.016361 | 0.023654 | 0.024247 |
| protein domain specific binding                             | GO:GO:0019904 | 0.009709 | 0.006454 | 0.007155 | 0.006857 |
| ATPase activity                                             | GO:GO:0016887 | 0.009709 | 0.025359 | 0.012783 | 0.009341 |
| plastid                                                     | GO:GO:0009536 | 0.009709 | 0.018481 | 0.010257 | 0.00393  |
| G-protein coupled receptor activity                         | GO:GO:0004930 | 0.009709 | 0.00718  | 0.010201 | 0.015147 |
| motor activity                                              | GO:GO:0003774 | 0.009709 | 0.007348 | 0.008445 | 0.012699 |
| manganese ion binding                                       | GO:GO:0030145 | 0.009709 | 0.00779  | 0.008638 | 0.00974  |

|                                                    |               |          |          |          |          |
|----------------------------------------------------|---------------|----------|----------|----------|----------|
| nuclear chromatin                                  | GO:GO:0000790 | 0.009709 | 0.008844 | 0.002221 | 0.001326 |
| transcription from RNA polymerase II promoter      | GO:GO:0006366 | 0.009709 | 0.009114 | 0.011616 | 0.009784 |
| potassium ion transport                            | GO:GO:0006813 | 0.009709 | 0.014674 | 0.004766 | 0.009587 |
| regulation of protein biosynthesis                 | GO:GO:0006417 | 0.009709 | 0.006231 | 0.003126 | 0.002568 |
| mitochondrial inner membrane                       | GO:GO:0005743 | 0.009709 | 0.014777 | 0.026525 | 0.024631 |
| protein kinase binding                             | GO:GO:0019901 | 0.009709 | 0.003855 | 0.003649 | 0.003396 |
| leading strand elongation                          | GO:GO:0006272 | 0.009709 | 0.008216 | 0.001554 | 0.000333 |
| anti-apoptosis                                     | GO:GO:0006916 | 0.009709 | 0.008812 | 0.011235 | 0.013502 |
| hormone activity                                   | GO:GO:0005179 | 0.009709 | 0.005105 | 0.003294 | 0.006913 |
| mismatch repair                                    | GO:GO:0006298 | 0.009709 | 0.010396 | 0.001883 | 0.000821 |
| sister chromatid cohesion                          | GO:GO:0007062 | 0.007282 | 0.007286 | 0.001714 | 0.001076 |
| cysteine-type peptidase activity                   | GO:GO:0008234 | 0.007282 | 0.003972 | 0.008893 | 0.008673 |
| G2/M transition of mitotic cell cycle              | GO:GO:0000086 | 0.007282 | 0.006319 | 0.002129 | 0.00251  |
| microsome                                          | GO:GO:0005792 | 0.007282 | 0.005814 | 0.014339 | 0.016343 |
| Rho guanyl-nucleotide exchange factor activity     | GO:GO:0005089 | 0.007282 | 0.003067 | 0.002994 | 0.002946 |
| embryonic development (sensu Mammalia)             | GO:GO:0001701 | 0.007282 | 0.003972 | 0.004489 | 0.003188 |
| spindle microtubule                                | GO:GO:0005876 | 0.007282 | 0.004281 | 0.001121 | 0.000969 |
| G1/S transition of mitotic cell cycle              | GO:GO:0000082 | 0.007282 | 0.008314 | 0.005439 | 0.004253 |
| Elg1 RFC-like complex                              | GO:GO:0031391 | 0.007282 | 0.005229 | 0.000897 | 0.000333 |
| cell death                                         | GO:GO:0008219 | 0.007282 | 0.003997 | 0.001653 | 0.003644 |
| receptor binding                                   | GO:GO:0005102 | 0.007282 | 0.009767 | 0.008377 | 0.011254 |
| negative regulation of apoptosis                   | GO:GO:0043066 | 0.007282 | 0.005807 | 0.006539 | 0.006937 |
| purine nucleotide binding                          | GO:GO:0017076 | 0.007282 | 0.003997 | 0.000486 | 0.000894 |
| mitotic chromosome condensation                    | GO:GO:0007076 | 0.007282 | 0.006152 | 0.00152  | 0.000796 |
| perinuclear region                                 | GO:GO:0048471 | 0.007282 | 0.005222 | 0.005786 | 0.006061 |
| regulation of Rho protein signal transduction      | GO:GO:0035023 | 0.007282 | 0.003067 | 0.002657 | 0.002847 |
| protein C-terminus binding                         | GO:GO:0008022 | 0.007282 | 0.004095 | 0.003706 | 0.004867 |
| regulation of S phase of mitotic cell cycle        | GO:GO:0007090 | 0.007282 | 0.00367  | 0.000746 | 0.000754 |
| rhodopsin-like receptor activity                   | GO:GO:0001584 | 0.007282 | 0.00577  | 0.006169 | 0.011928 |
| response to unfolded protein                       | GO:GO:0006986 | 0.007282 | 0.004557 | 0.008733 | 0.004949 |
| protein kinase inhibitor activity                  | GO:GO:0004860 | 0.007282 | 0.001817 | 0.002943 | 0.003666 |
| regulation of apoptosis                            | GO:GO:0042981 | 0.007282 | 0.01037  | 0.012976 | 0.011025 |
| Rad17 RFC-like complex                             | GO:GO:0031389 | 0.007282 | 0.005229 | 0.000957 | 0.000333 |
| structural constituent of ribosome                 | GO:GO:0003735 | 0.007282 | 0.034656 | 0.028015 | 0.008558 |
| tissue regeneration                                | GO:GO:0042246 | 0.007282 | 0.00335  | 0.002877 | 0.002976 |
| Ctf18 RFC-like complex                             | GO:GO:0031390 | 0.007282 | 0.005229 | 0.000961 | 0.000333 |
| mitotic cell cycle                                 | GO:GO:0000278 | 0.007282 | 0.001613 | 0.002269 | 0.001112 |
| external side of plasma membrane                   | GO:GO:0009897 | 0.007282 | 0.00577  | 0.005851 | 0.012948 |
| structural constituent of cytoskeleton             | GO:GO:0005200 | 0.007282 | 0.007075 | 0.009922 | 0.015497 |
| ATP-dependent DNA helicase activity                | GO:GO:0004003 | 0.007282 | 0.006257 | 0.002665 | 0.001057 |
| JAK-STAT cascade                                   | GO:GO:0007259 | 0.007282 | 0.002747 | 0.002939 | 0.002444 |
| diacylglycerol binding                             | GO:GO:0019992 | 0.007282 | 0.001817 | 0.00243  | 0.004963 |
| cell growth                                        | GO:GO:0016049 | 0.007282 | 0.003979 | 0.004298 | 0.004041 |
| microtubule motor activity                         | GO:GO:0003777 | 0.007282 | 0.006417 | 0.004636 | 0.004362 |
| transferase activity, transferring glycosyl groups | GO:GO:0016757 | 0.007282 | 0.008233 | 0.010075 | 0.012585 |
| microtubule-based movement                         | GO:GO:0007018 | 0.007282 | 0.007642 | 0.006469 | 0.005862 |
| kinesin complex                                    | GO:GO:0005871 | 0.007282 | 0.004582 | 0.002738 | 0.002893 |
| meiotic recombination                              | GO:GO:0007131 | 0.007282 | 0.005538 | 0.001531 | 0.000671 |

|                                                                |               |          |          |          |          |
|----------------------------------------------------------------|---------------|----------|----------|----------|----------|
| muscle development                                             | GO:GO:0007517 | 0.007282 | 0.00824  | 0.005682 | 0.007735 |
| DNA packaging                                                  | GO:GO:0006323 | 0.007282 | 0.012161 | 0.003097 | 0.001051 |
| phosphoinositide-mediated signaling                            | GO:GO:0048015 | 0.007282 | 0.007728 | 0.001682 | 0.002893 |
| phosphoprotein phosphatase activity                            | GO:GO:0004721 | 0.007282 | 0.007888 | 0.012076 | 0.012313 |
| protein import into nucleus                                    | GO:GO:0006606 | 0.007282 | 0.00282  | 0.004336 | 0.002432 |
| cytoplasmic membrane-bound vesicle                             | GO:GO:0016023 | 0.007282 | 0.003972 | 0.005136 | 0.007133 |
| mitochondrial matrix                                           | GO:GO:0005759 | 0.007282 | 0.005424 | 0.006181 | 0.004012 |
| ubiquitin ligase complex                                       | GO:GO:0000151 | 0.007282 | 0.005123 | 0.004518 | 0.002223 |
| protein tyrosine phosphatase activity                          | GO:GO:0004725 | 0.007282 | 0.009145 | 0.008428 | 0.009438 |
| transcription corepressor activity                             | GO:GO:0003714 | 0.007282 | 0.004575 | 0.011304 | 0.007759 |
| regulation of translational initiation                         | GO:GO:0006446 | 0.007282 | 0.005123 | 0.005171 | 0.001648 |
| DNA-directed RNA polymerase I complex                          | GO:GO:0005736 | 0.007282 | 0.003067 | 0.000854 | 0.000582 |
| telomere maintenance via telomerase                            | GO:GO:0007004 | 0.007282 | 0.00194  | 0.000578 | 0        |
| cellular morphogenesis                                         | GO:GO:0000902 | 0.007282 | 0.00638  | 0.002778 | 0.003547 |
| microtubule cytoskeleton organization and biogenesis           | GO:GO:0000226 | 0.007282 | 0.001915 | 0.003241 | 0.003716 |
| actin filament                                                 | GO:GO:0005884 | 0.007282 | 0.005549 | 0.002444 | 0.005856 |
| Golgi apparatus                                                | GO:GO:0005794 | 0.007282 | 0.009237 | 0.017782 | 0.021142 |
| DNA methylation                                                | GO:GO:0006306 | 0.007282 | 0.006479 | 0.002463 | 0.00172  |
| proline biosynthesis                                           | GO:GO:0006561 | 0.007282 | 0.002445 | 0.000437 | 0.000372 |
| growth factor activity                                         | GO:GO:0008083 | 0.007282 | 0.00335  | 0.00752  | 0.011909 |
| secretory granule                                              | GO:GO:0030141 | 0.007282 | 0.001515 | 0.003057 | 0.003677 |
| acute-phase response                                           | GO:GO:0006953 | 0.007282 | 0.002445 | 0.001153 | 0.005187 |
| protein homodimerization activity                              | GO:GO:0042803 | 0.007282 | 0.011212 | 0.010557 | 0.019143 |
| extracellular matrix (sensu Metazoa)                           | GO:GO:0005578 | 0.007282 | 0.01876  | 0.013743 | 0.020697 |
| ribosome biogenesis and assembly                               | GO:GO:0042254 | 0.007282 | 0.009686 | 0.002884 | 0.000469 |
| cyclin-dependent protein kinase holoenzyme complex             | GO:GO:0000307 | 0.007282 | 0.005832 | 0.003103 | 0.001383 |
| nucleobase, nucleoside, nucleotide and nucleic acid metabolism | GO:GO:0006139 | 0.007282 | 0.009848 | 0.00536  | 0.004742 |
| base-excision repair                                           | GO:GO:0006284 | 0.007282 | 0.007507 | 0.002199 | 0.001125 |
| Golgi membrane                                                 | GO:GO:0000139 | 0.007282 | 0.001817 | 0.004606 | 0.00428  |
| negative regulation of transcription, DNA-dependent            | GO:GO:0045892 | 0.007282 | 0.005825 | 0.00678  | 0.005303 |
| transcriptional activator activity                             | GO:GO:0016563 | 0.007282 | 0.00681  | 0.015638 | 0.014044 |
| endoplasmic reticulum membrane                                 | GO:GO:0005789 | 0.007282 | 0.004909 | 0.007557 | 0.00866  |
| chromatin assembly or disassembly                              | GO:GO:0006333 | 0.007282 | 0.010345 | 0.006746 | 0.002809 |
| ubiquitin thiolesterase activity                               | GO:GO:0004221 | 0.007282 | 0.00492  | 0.005477 | 0.003838 |
| protein transporter activity                                   | GO:GO:0008565 | 0.007282 | 0.011871 | 0.01667  | 0.0125   |
| mitotic sister chromatid segregation                           | GO:GO:0000070 | 0.007282 | 0.012391 | 0.00305  | 0.002438 |
| regulation of cell proliferation                               | GO:GO:0042127 | 0.007282 | 0.014933 | 0.009611 | 0.006284 |
| protein ubiquitination                                         | GO:GO:0016567 | 0.007282 | 0.006126 | 0.006826 | 0.003774 |
| basolateral plasma membrane                                    | GO:GO:0016323 | 0.007282 | 0.008455 | 0.003319 | 0.004065 |
| phosphatase inhibitor activity                                 | GO:GO:0019212 | 0.007282 | 0.005123 | 0.001151 | 0.000536 |
| mRNA metabolism                                                | GO:GO:0016071 | 0.007282 | 0.006207 | 0.003738 | 0.001112 |
| nucleotide metabolism                                          | GO:GO:0009117 | 0.007282 | 0.003997 | 0.002877 | 0.00263  |
| establishment and/or maintenance of chromatin architecture     | GO:GO:0006325 | 0.007282 | 0.008829 | 0.00406  | 0.002412 |
| telomere maintenance                                           | GO:GO:0000723 | 0.007282 | 0.005327 | 0.005803 | 0.003474 |
| nucleocytoplasmic transporter activity                         | GO:GO:0005487 | 0.007282 | 0.00492  | 0.001374 | 0.00044  |
| ER to Golgi vesicle-mediated transport                         | GO:GO:0006888 | 0.007282 | 0.003954 | 0.00829  | 0.008115 |

|                                                                                                                               |               |          |          |          |          |
|-------------------------------------------------------------------------------------------------------------------------------|---------------|----------|----------|----------|----------|
| translational initiation                                                                                                      | GO:GO:0006413 | 0.007282 | 0.00242  | 0.005872 | 0.001968 |
| regulation of DNA replication                                                                                                 | GO:GO:0006275 | 0.007282 | 0.004299 | 0.001728 | 0.001697 |
| amino acid metabolism                                                                                                         | GO:GO:0006520 | 0.004854 | 0.001312 | 0.005363 | 0.004084 |
| symporter activity                                                                                                            | GO:GO:0015293 | 0.004854 | 0.006195 | 0.004413 | 0.006607 |
| fatty acid elongation                                                                                                         | GO:GO:0030497 | 0.004854 | 0.002242 | 0.001129 | 0.000828 |
| cell cycle checkpoint                                                                                                         | GO:GO:0000075 | 0.004854 | 0.003474 | 0.001128 | 0.000618 |
| aminopeptidase activity                                                                                                       | GO:GO:0004177 | 0.004854 | 0.001613 | 0.003373 | 0.003717 |
| antimicrobial humoral response (sensu Vertebrata)                                                                             | GO:GO:0019735 | 0.004854 | 0.00101  | 0.00229  | 0.003926 |
| lipid binding                                                                                                                 | GO:GO:0008289 | 0.004854 | 0.006453 | 0.007881 | 0.011607 |
| oxidoreductase activity, acting on the CH-OH group of donors, NAD or NADP as acceptor                                         | GO:GO:0016616 | 0.004854 | 0.000302 | 0.001755 | 0.001562 |
| glutamine metabolism                                                                                                          | GO:GO:0006541 | 0.004854 | 0.00226  | 0.001738 | 0.000862 |
| nuclear chromosome                                                                                                            | GO:GO:0000228 | 0.004854 | 0.00585  | 0.002646 | 0.001781 |
| heat shock protein binding                                                                                                    | GO:GO:0031072 | 0.004854 | 0.002562 | 0.003775 | 0.003732 |
| histone phosphorylation                                                                                                       | GO:GO:0016572 | 0.004854 | 0.003713 | 0.001034 | 0.000337 |
| hemopoiesis                                                                                                                   | GO:GO:0030097 | 0.004854 | 0.002217 | 0.004169 | 0.004704 |
| identical protein binding                                                                                                     | GO:GO:0042802 | 0.004854 | 0.008953 | 0.008429 | 0.010659 |
| response to biotic stimulus                                                                                                   | GO:GO:0009607 | 0.004854 | 0.00101  | 0.001046 | 0.000298 |
| non-G-protein coupled 7TM receptor activity                                                                                   | GO:GO:0004926 | 0.004854 | 0.001613 | 0.001324 | 0.000229 |
| oxidoreductase activity, acting on single donors with incorporation of molecular oxygen, incorporation of two atoms of oxygen | GO:GO:0016702 | 0.004854 | 0.001312 | 0.003106 | 0.003984 |
| brain development                                                                                                             | GO:GO:0007420 | 0.004854 | 0.001712 | 0.005908 | 0.006594 |
| smooth muscle contraction                                                                                                     | GO:GO:0006939 | 0.004854 | 0.006584 | 0.000913 | 0.001939 |
| sodium ion transport                                                                                                          | GO:GO:0006814 | 0.004854 | 0.0067   | 0.004474 | 0.007481 |
| protein export from nucleus                                                                                                   | GO:GO:0006611 | 0.004854 | 0.004212 | 0.002255 | 0.001276 |
| generation of precursor metabolites and energy                                                                                | GO:GO:0006091 | 0.004854 | 0.001312 | 0.004102 | 0.00683  |
| mRNA polyadenylation                                                                                                          | GO:GO:0006378 | 0.004854 | 0.002242 | 0.002879 | 0.001215 |
| heart development                                                                                                             | GO:GO:0007507 | 0.004854 | 0.009211 | 0.00946  | 0.010261 |
| purine nucleotide biosynthesis                                                                                                | GO:GO:0006164 | 0.004854 | 0.010537 | 0.002378 | 0.001316 |
| ribose phosphate diphosphokinase activity                                                                                     | GO:GO:0004749 | 0.004854 | 0.002562 | 0.000942 | 0.000261 |
| guanyl-nucleotide exchange factor activity                                                                                    | GO:GO:0005085 | 0.004854 | 0.003165 | 0.006273 | 0.006647 |
| carbonate dehydratase activity                                                                                                | GO:GO:0004089 | 0.004854 | 0.000505 | 0.001111 | 0.001736 |
| small nuclear ribonucleoprotein complex                                                                                       | GO:GO:0030532 | 0.004854 | 0.002544 | 0.001588 | 0.001401 |
| metaphase plate congression                                                                                                   | GO:GO:0051310 | 0.004854 | 0.004643 | 0.000314 | 0        |
| positive regulation of apoptosis                                                                                              | GO:GO:0043065 | 0.004854 | 0.004175 | 0.004528 | 0.004377 |
| L-serine metabolism                                                                                                           | GO:GO:0006563 | 0.004854 | 0.00226  | 0.000465 | 0.000242 |
| glycine hydroxymethyltransferase activity                                                                                     | GO:GO:0004372 | 0.004854 | 0.00226  | 0.000465 | 9.15E-05 |
| RNA splicing factor activity, transesterification mechanism                                                                   | GO:GO:0031202 | 0.004854 | 0.011206 | 0.00559  | 0.001462 |
| GPI anchor binding                                                                                                            | GO:GO:0048503 | 0.004854 | 0.006805 | 0.005573 | 0.012457 |
| nuclear origin of replication recognition complex                                                                             | GO:GO:0005664 | 0.004854 | 0.002863 | 0.000788 | 0.000267 |
| cellular protein metabolism                                                                                                   | GO:GO:0044267 | 0.004854 | 0.004372 | 0.004293 | 0.0007   |
| circadian rhythm                                                                                                              | GO:GO:0007623 | 0.004854 | 0.001312 | 0.002446 | 0.002436 |
| chloride transport                                                                                                            | GO:GO:0006821 | 0.004854 | 0.007746 | 0.003572 | 0.004421 |
| pyridoxal phosphate binding                                                                                                   | GO:GO:0030170 | 0.004854 | 0.002562 | 0.001    | 0.001023 |

|                                                                  |               |          |          |          |          |
|------------------------------------------------------------------|---------------|----------|----------|----------|----------|
| protein serine/threonine phosphatase activity                    | GO:GO:0004722 | 0.004854 | 0.005548 | 0.003647 | 0.003484 |
| cell tip                                                         | GO:GO:0051286 | 0.004854 | 0.00101  | 0.001469 | 0.000957 |
| phospholipid binding                                             | GO:GO:0005543 | 0.004854 | 0.00101  | 0.004102 | 0.003676 |
| DNA strand elongation                                            | GO:GO:0006271 | 0.004854 | 0.004724 | 0.001895 | 0.000516 |
| pattern specification                                            | GO:GO:0007389 | 0.004854 | 0.002544 | 0.002841 | 0.002211 |
| tricarboxylic acid cycle                                         | GO:GO:0006099 | 0.004854 | 0.002845 | 0.003704 | 0.002629 |
| alpha DNA polymerase:primase complex                             | GO:GO:0005658 | 0.004854 | 0.003812 | 0.000895 | 0.00084  |
| mitotic spindle assembly                                         | GO:GO:0051227 | 0.004854 | 0.004095 | 0.001381 | 0.000832 |
| insulin-like growth factor binding                               | GO:GO:0005520 | 0.004854 | 0.001613 | 0.001503 | 0.00177  |
| ubiquitin activating enzyme activity                             | GO:GO:0004839 | 0.004854 | 0        | 0.001083 | 0.000446 |
| protein phosphatase type 2A regulator activity                   | GO:GO:0008601 | 0.004854 | 0.002544 | 0.001219 | 0.000693 |
| ribonuclease activity                                            | GO:GO:0004540 | 0.004854 | 0.00351  | 0.000869 | 0.000529 |
| mitochondrion organization and biogenesis                        | GO:GO:0007005 | 0.004854 | 0.003794 | 0.001519 | 0.001575 |
| histone acetylation                                              | GO:GO:0016573 | 0.004854 | 0.004095 | 0.002452 | 0.001664 |
| G2 phase of mitotic cell cycle                                   | GO:GO:0000085 | 0.004854 | 0.003492 | 0.000593 | 0.000989 |
| blood coagulation                                                | GO:GO:0007596 | 0.004854 | 0.001915 | 0.004317 | 0.007249 |
| cell motility                                                    | GO:GO:0006928 | 0.004854 | 0.008225 | 0.01123  | 0.014334 |
| heme binding                                                     | GO:GO:0020037 | 0.004854 | 0.005604 | 0.00792  | 0.012153 |
| pyrroline-5-carboxylate reductase activity                       | GO:GO:0004735 | 0.004854 | 0.00194  | 0.000377 | 0.000315 |
| nucleotide biosynthesis                                          | GO:GO:0009165 | 0.004854 | 0.006294 | 0.00165  | 0.000675 |
| transmembrane receptor protein tyrosine kinase signaling pathway | GO:GO:0007169 | 0.004854 | 0.009294 | 0.005817 | 0.009499 |
| microtubule associated complex                                   | GO:GO:0005875 | 0.004854 | 0.006516 | 0.004811 | 0.00613  |
| transmembrane-ephrin receptor activity                           | GO:GO:0005005 | 0.004854 | 0.005573 | 0.000234 | 9.87E-05 |
| actin cytoskeleton organization and biogenesis                   | GO:GO:0030036 | 0.004854 | 0.006541 | 0.00929  | 0.013115 |
| negative regulation of inflammatory response                     | GO:GO:0050728 | 0.004854 | 0.00101  | 0.000638 | 0.001424 |
| chromosome, telomeric region                                     | GO:GO:0000781 | 0.004854 | 0.000807 | 0.001464 | 0.000148 |
| vesicle-mediated transport                                       | GO:GO:0016192 | 0.004854 | 0.006151 | 0.010428 | 0.014224 |
| DNA replication, synthesis of RNA primer                         | GO:GO:0006269 | 0.004854 | 0.00351  | 0.000795 | 0.000524 |
| receptor signaling protein serine/threonine kinase activity      | GO:GO:0004702 | 0.004854 | 0.007408 | 0.002784 | 0.002597 |
| response to drug                                                 | GO:GO:0042493 | 0.004854 | 0.002544 | 0.001942 | 0.002689 |
| nucleolus organization and biogenesis                            | GO:GO:0007000 | 0.004854 | 0.00226  | 0.001188 | 0.000302 |
| serine-type endopeptidase activity                               | GO:GO:0004252 | 0.004854 | 0.00351  | 0.004983 | 0.011708 |
| regulation of transcription from RNA polymerase II promoter      | GO:GO:0006357 | 0.004854 | 0.012704 | 0.023576 | 0.016431 |
| Ras protein signal transduction                                  | GO:GO:0007265 | 0.004854 | 0.001312 | 0.002949 | 0.002884 |
| structural constituent of nuclear pore                           | GO:GO:0017056 | 0.004854 | 0.003794 | 0.000592 | 9.87E-05 |
| DNA synthesis during DNA repair                                  | GO:GO:0000731 | 0.004854 | 0.004742 | 0.000527 | 0.000457 |
| ion channel activity                                             | GO:GO:0005216 | 0.004854 | 0.010129 | 0.008119 | 0.017069 |
| spindle pole                                                     | GO:GO:0000922 | 0.004854 | 0.003677 | 0.001224 | 0.0008   |
| S-adenosylmethionine-dependent methyltransferase activity        | GO:GO:0008757 | 0.004854 | 0.005327 | 0.002729 | 0.00214  |
| phosphoinositide binding                                         | GO:GO:0035091 | 0.004854 | 0.001613 | 0.003253 | 0.003002 |
| calcium ion homeostasis                                          | GO:GO:0006874 | 0.004854 | 0.00101  | 0.003971 | 0.006476 |
| endonuclease activity                                            | GO:GO:0004519 | 0.004854 | 0.007526 | 0.003471 | 0.003615 |
| axon guidance receptor activity                                  | GO:GO:0008046 | 0.004854 | 0.006823 | 0.000506 | 0.000199 |
| oogenesis                                                        | GO:GO:0048477 | 0.004854 | 0.000505 | 0.000381 | 0        |
| regulation of cell shape                                         | GO:GO:0008360 | 0.004854 | 0.002944 | 0.006653 | 0.008137 |

|                                                                 |               |          |          |          |          |
|-----------------------------------------------------------------|---------------|----------|----------|----------|----------|
| protein phosphatase type 2A complex                             | GO:GO:0000159 | 0.004854 | 0.002544 | 0.001084 | 0.001203 |
| NAD binding                                                     | GO:GO:0051287 | 0.004854 | 0.001552 | 0.003274 | 0.003522 |
| synapse                                                         | GO:GO:0045202 | 0.004854 | 0.002845 | 0.006103 | 0.009316 |
| DNA damage checkpoint                                           | GO:GO:0000077 | 0.004854 | 0.005334 | 0.002409 | 0.000955 |
| Wnt receptor signaling pathway                                  | GO:GO:0016055 | 0.004854 | 0.005284 | 0.00932  | 0.005542 |
| heparin binding                                                 | GO:GO:0008201 | 0.004854 | 0.007107 | 0.006742 | 0.008104 |
| learning                                                        | GO:GO:0007612 | 0.004854 | 0.005875 | 0.000829 | 0.000555 |
| spindle pole body                                               | GO:GO:0005816 | 0.004854 | 0.003474 | 0.00189  | 0.00196  |
| glycine metabolism                                              | GO:GO:0006544 | 0.004854 | 0.002562 | 0.000815 | 9.15E-05 |
| double-stranded DNA binding                                     | GO:GO:0003690 | 0.004854 | 0.011915 | 0.008206 | 0.007147 |
| delta DNA polymerase complex                                    | GO:GO:0043625 | 0.004854 | 0.005672 | 0.000527 | 0.000457 |
| long-chain fatty acid biosynthesis                              | GO:GO:0042759 | 0.004854 | 0.004014 | 0.001171 | 0.00063  |
| outer kinetochore of condensed chromosome                       | GO:GO:0000940 | 0.004854 | 0.00194  | 0.00049  | 0.000451 |
| tRNA processing                                                 | GO:GO:0008033 | 0.004854 | 0.00101  | 0.00313  | 0.000813 |
| cell surface                                                    | GO:GO:0009986 | 0.004854 | 0.00771  | 0.009842 | 0.012201 |
| L-serine biosynthesis                                           | GO:GO:0006564 | 0.004854 | 0.000807 | 0.00171  | 0.000523 |
| epithelial cell differentiation                                 | GO:GO:0030855 | 0.004854 | 0.001613 | 0.002647 | 0.003277 |
| fatty acid elongase activity                                    | GO:GO:0009922 | 0.004854 | 0.002242 | 0.001129 | 0.000828 |
| hydrolase activity, acting on glycosyl bonds                    | GO:GO:0016798 | 0.004854 | 0.001108 | 0.004086 | 0.006926 |
| positive regulation of I-kappaB kinase/NF-kappaB cascade        | GO:GO:0043123 | 0.004854 | 0.004372 | 0.005316 | 0.004432 |
| purine nucleotide metabolism                                    | GO:GO:0006163 | 0.004854 | 0.00101  | 0.001303 | 0.000461 |
| transcription from RNA polymerase I promoter                    | GO:GO:0006360 | 0.004854 | 0.002562 | 0.001    | 0.000451 |
| double-strand break repair via homologous recombination         | GO:GO:0000724 | 0.004854 | 0.002544 | 0.000876 | 0.0009   |
| protein disulfide oxidoreductase activity                       | GO:GO:0015035 | 0.004854 | 0.003768 | 0.003483 | 0.00172  |
| integrin-mediated signaling pathway                             | GO:GO:0007229 | 0.004854 | 0.002845 | 0.004366 | 0.008535 |
| RNA polymerase II transcription factor activity                 | GO:GO:0003702 | 0.004854 | 0.004052 | 0.012049 | 0.011377 |
| lagging strand elongation                                       | GO:GO:0006273 | 0.004854 | 0.003492 | 0.000758 | 0.000149 |
| mitotic spindle checkpoint                                      | GO:GO:0007094 | 0.004854 | 0.003776 | 0.001816 | 0.000625 |
| induction of apoptosis                                          | GO:GO:0006917 | 0.004854 | 0.008135 | 0.011235 | 0.011884 |
| establishment and/or maintenance of cell polarity (sensu Fungi) | GO:GO:0030467 | 0.004854 | 0.001312 | 0.001519 | 0.000791 |
| cytokine and chemokine mediated signaling pathway               | GO:GO:0019221 | 0.004854 | 0.00101  | 0.00339  | 0.00431  |
| endopeptidase inhibitor activity                                | GO:GO:0004866 | 0.004854 | 0.002242 | 0.003808 | 0.009187 |
| protein import into nucleus, docking                            | GO:GO:0000059 | 0.004854 | 0.0071   | 0.003935 | 0.001968 |
| I-kappaB kinase/NF-kappaB cascade                               | GO:GO:0007249 | 0.004854 | 0.00101  | 0.001276 | 0.002568 |
| SH2 domain binding                                              | GO:GO:0042169 | 0.004854 | 0.004113 | 0.001428 | 0.001409 |
| protein metabolism                                              | GO:GO:0019538 | 0.004854 | 0.00194  | 0.003368 | 0.003988 |
| DNA replication factor A complex                                | GO:GO:0005662 | 0.004854 | 0.00226  | 0.000379 | 0.000267 |
| actin cytoskeleton                                              | GO:GO:0015629 | 0.004854 | 0.016095 | 0.008748 | 0.015901 |
| ephrin receptor activity                                        | GO:GO:0005003 | 0.004854 | 0.006504 | 0.000904 | 0.001318 |
| transcription coactivator activity                              | GO:GO:0003713 | 0.004854 | 0.009328 | 0.013105 | 0.007212 |
| spermatogenesis                                                 | GO:GO:0007283 | 0.004854 | 0.015784 | 0.01191  | 0.011391 |
| poly(A)+ mRNA export from nucleus                               | GO:GO:0016973 | 0.004854 | 0.001613 | 0.001408 | 0.000248 |
| M phase of mitotic cell cycle                                   | GO:GO:0000087 | 0.004854 | 0.003801 | 0.001003 | 0.000886 |
| chromatin silencing at telomere                                 | GO:GO:0006348 | 0.004854 | 0.000807 | 0.001353 | 0.000789 |

|                                                                      |               |          |          |          |          |
|----------------------------------------------------------------------|---------------|----------|----------|----------|----------|
| mRNA cleavage                                                        | GO:GO:0006379 | 0.004854 | 0.002242 | 0.001672 | 0.000597 |
| fatty acid biosynthesis                                              | GO:GO:0006633 | 0.004854 | 0.004759 | 0.004274 | 0.003312 |
| central nervous system development                                   | GO:GO:0007417 | 0.004854 | 0.003776 | 0.005795 | 0.008643 |
| lysosome                                                             | GO:GO:0005764 | 0.004854 | 0.001613 | 0.011589 | 0.020817 |
| negative regulation of progression through cell cycle                | GO:GO:0045786 | 0.004854 | 0.005345 | 0.006298 | 0.006647 |
| telomeric DNA binding                                                | GO:GO:0042162 | 0.004854 | 0.000505 | 0.000373 | 0        |
| cell wall biosynthesis (sensu Fungi)                                 | GO:GO:0009272 | 0.004854 | 0.00101  | 0.000457 | 0.000205 |
| extracellular matrix organization and biogenesis                     | GO:GO:0030198 | 0.004854 | 0.00194  | 0.002668 | 0.005099 |
| gametogenesis                                                        | GO:GO:0007276 | 0.004854 | 0.002544 | 0.001671 | 0.000414 |
| gastrulation (sensu Mammalia)                                        | GO:GO:0010003 | 0.004854 | 0.001312 | 0.002355 | 0.000894 |
| proton transport                                                     | GO:GO:0015992 | 0.004854 | 0.002562 | 0.006775 | 0.009182 |
| damaged DNA binding                                                  | GO:GO:0003684 | 0.004854 | 0.005931 | 0.004008 | 0.002508 |
| muscle contraction                                                   | GO:GO:0006936 | 0.004854 | 0.001613 | 0.003648 | 0.009533 |
| regulation of striated muscle development                            | GO:GO:0016202 | 0.004854 | 0.00194  | 0.000132 | 0.000537 |
| phospholipid dephosphorylation                                       | GO:GO:0046839 | 0.004854 | 0.003713 | 0.000356 | 0.001049 |
| cell-matrix adhesion                                                 | GO:GO:0007160 | 0.004854 | 0.002845 | 0.003517 | 0.007297 |
| carboxy-lyase activity                                               | GO:GO:0016831 | 0.004854 | 0.006195 | 0.002268 | 0.001152 |
| T cell differentiation                                               | GO:GO:0030217 | 0.004854 | 0.001312 | 0.001449 | 0.001771 |
| cyclin binding                                                       | GO:GO:0030332 | 0.004854 | 0.005548 | 0.002052 | 0.001463 |
| muscle maintenance                                                   | GO:GO:0046716 | 0.004854 | 0.003713 | 0.000325 | 0.000563 |
| ribonuclease H activity                                              | GO:GO:0004523 | 0.004854 | 0.005044 | 0.001367 | 0.000484 |
| spermatid development                                                | GO:GO:0007286 | 0.004854 | 0.00141  | 0.002052 | 0.001903 |
| hydrogen ion transporter activity                                    | GO:GO:0015078 | 0.004854 | 0.00101  | 0.004785 | 0.007604 |
| regulation of GTPase activity                                        | GO:GO:0043087 | 0.004854 | 0.00101  | 0.001986 | 0.002793 |
| actomyosin structure organization and biogenesis                     | GO:GO:0031032 | 0.004854 | 0.003492 | 0.000373 | 0.001179 |
| negative regulation of cell growth                                   | GO:GO:0030308 | 0.004854 | 0.004121 | 0.002481 | 0.004128 |
| positive regulation of transcription from RNA polymerase II promoter | GO:GO:0045944 | 0.004854 | 0.014088 | 0.019622 | 0.01476  |
| ribonucleoside-diphosphate reductase activity                        | GO:GO:0004748 | 0.004854 | 0.006496 | 0.000731 | 0.000385 |
| hyaluronic acid binding                                              | GO:GO:0005540 | 0.004854 | 0.003713 | 0.000936 | 0.000922 |
| barrier septum                                                       | GO:GO:0000935 | 0.004854 | 0.00101  | 0.001743 | 0.002132 |
| synaptic vesicle                                                     | GO:GO:0008021 | 0.004854 | 0.00226  | 0.003423 | 0.0043   |
| methenyltetrahydrofolate cyclohydrolase activity                     | GO:GO:0004477 | 0.002427 | 0.001737 | 0.000404 | 0.000367 |
| regulation of circadian rhythm                                       | GO:GO:0042752 | 0.002427 | 0.000505 | 0.000738 | 0        |
| imidazolonepropionase activity                                       | GO:GO:0050480 | 0.002427 | 0.000505 | 0        | 0        |
| specific transcriptional repressor activity                          | GO:GO:0016566 | 0.002427 | 0.000807 | 0.001233 | 0.000619 |
| cytoplasmic sequestering of transcription factor SAGA complex        | GO:GO:0042994 | 0.002427 | 0.000505 | 0.000221 | 0.000952 |
|                                                                      | GO:GO:0000124 | 0.002427 | 0.002057 | 0.001135 | 0.000514 |
| malate dehydrogenase (oxaloacetate-decarboxylating) (NADP+) activity | GO:GO:0004473 | 0.002427 | 0        | 0.000158 | 0.000155 |
| regulation of neuronal synaptic plasticity                           | GO:GO:0048168 | 0.002427 | 0.005068 | 0.001618 | 0.001309 |
| calcium-dependent protein serine/threonine phosphatase activity      | GO:GO:0004723 | 0.002427 | 0.000505 | 0.000373 | 0.000272 |
| complement component C1q binding                                     | GO:GO:0001849 | 0.002427 | 0.000505 | 0.000189 | 5.66E-05 |
| phosphoenolpyruvate carboxykinase activity                           | GO:GO:0004611 | 0.002427 | 0.000505 | 0.00019  | 0.000157 |



|                                                                  |               |          |          |          |          |
|------------------------------------------------------------------|---------------|----------|----------|----------|----------|
| sterol metabolism                                                | GO:GO:0016125 | 0.002427 | 0.001737 | 0.000795 | 0.00113  |
| gap-junction forming channel activity                            | GO:GO:0005243 | 0.002427 | 0.000807 | 0.000716 | 0.000387 |
| centromeric DNA binding                                          | GO:GO:0019237 | 0.002427 | 0.00141  | 0.00102  | 0.000573 |
| voltage-gated potassium channel complex                          | GO:GO:0008076 | 0.002427 | 0.006841 | 0.002532 | 0.003875 |
| morphogenesis of an epithelium                                   | GO:GO:0002009 | 0.002427 | 0.001435 | 0.000487 | 0.000869 |
| barrier septum formation                                         | GO:GO:0000917 | 0.002427 | 0.001108 | 0.001529 | 0.001191 |
| UTP biosynthesis                                                 | GO:GO:0006228 | 0.002427 | 0.001737 | 0.001167 | 0.000832 |
| guard mother cell cytokinesis                                    | GO:GO:0010235 | 0.002427 | 0.000505 | 0.000362 | 0.000521 |
| induction of an organ                                            | GO:GO:0001759 | 0.002427 | 0.001435 | 0.000837 | 0.000256 |
| transcription cofactor activity                                  | GO:GO:0003712 | 0.002427 | 0.000807 | 0.003612 | 0.004287 |
| nuclear export                                                   | GO:GO:0051168 | 0.002427 | 0.002057 | 0.000448 | 5.66E-05 |
| copper, zinc superoxide dismutase activity                       | GO:GO:0004785 | 0.002427 | 0.000505 | 0.001416 | 0.000728 |
| phosphorylation                                                  | GO:GO:0016310 | 0.002427 | 0.000807 | 0.003521 | 0.002464 |
| neuronal Cdc2-like kinase binding                                | GO:GO:0042808 | 0.002427 | 0.000505 | 0.000145 | 0        |
| p53 binding                                                      | GO:GO:0002039 | 0.002427 | 0.001755 | 0.000184 | 5.66E-05 |
| physiological process                                            | GO:GO:0007582 | 0.002427 | 0.000807 | 0.000787 | 0.002221 |
| cyclin-dependent protein kinase inhibitor activity               | GO:GO:0004861 | 0.002427 | 0.001108 | 0.001583 | 0.001714 |
| chromatin silencing at silent mating-type cassette               | GO:GO:0030466 | 0.002427 | 0.000505 | 0.000655 | 0.000239 |
| blood vessel remodeling                                          | GO:GO:0001974 | 0.002427 | 0.000505 | 0.000827 | 0.001002 |
| tracheal system development (sensu Insecta)                      | GO:GO:0007424 | 0.002427 | 0.001737 | 0.001052 | 0.002767 |
| thyroid hormone receptor binding                                 | GO:GO:0046966 | 0.002427 | 0.002057 | 0.001216 | 0.000662 |
| spindle organization and biogenesis                              | GO:GO:0007051 | 0.002427 | 0.002358 | 0.001314 | 0.000577 |
| prostaglandin transport                                          | GO:GO:0015732 | 0.002427 | 0.000505 | 0.000178 | 0.000397 |
| vasculogenesis                                                   | GO:GO:0001570 | 0.002427 | 0.004741 | 0.003076 | 0.002548 |
| cell migration during gastrulation                               | GO:GO:0042074 | 0.002427 | 0.001737 | 0.003508 | 0.002307 |
| isopeptide cross-linking via N6-(L-isoglutamyl)-L-lysine         | GO:GO:0018153 | 0.002427 | 0.000505 | 0.000477 | 0.000123 |
| neuromuscular junction development                               | GO:GO:0007528 | 0.002427 | 0.000807 | 0.000953 | 0.000739 |
| caspase inhibitor activity                                       | GO:GO:0043027 | 0.002427 | 0.001108 | 0.000704 | 0.000638 |
| site-specific DNA-methyltransferase (cytosine-specific) activity | GO:GO:0008326 | 0.002427 | 0.002987 | 0.000248 | 0.000175 |
| folic acid and derivative biosynthesis                           | GO:GO:0009396 | 0.002427 | 0.002667 | 0.000565 | 0.000367 |
| dopamine metabolism                                              | GO:GO:0042417 | 0.002427 | 0.000505 | 0.000441 | 0.000806 |
| protein N-terminus binding                                       | GO:GO:0047485 | 0.002427 | 0.001435 | 0.001106 | 0.002317 |
| tryptophan-tRNA ligase activity                                  | GO:GO:0004830 | 0.002427 | 0.000505 | 0.000426 | 9.15E-05 |
| CD27 receptor binding                                            | GO:GO:0005175 | 0.002427 | 0        | 0.000106 | 0        |
| chemoattractant activity                                         | GO:GO:0042056 | 0.002427 | 0.000505 | 0.000398 | 0.000895 |
| CXCR3 chemokine receptor binding                                 | GO:GO:0048248 | 0.002427 | 0.000505 | 0        | 5.66E-05 |
| regulation of cell volume                                        | GO:GO:0006884 | 0.002427 | 0.000505 | 0.000658 | 0.000586 |
| mRNA cleavage and polyadenylation specificity factor complex     | GO:GO:0005847 | 0.002427 | 0.001435 | 0.001027 | 0.000451 |
| methylated-DNA-[protein]-cysteine S-methyltransferase activity   | GO:GO:0003908 | 0.002427 | 0.000505 | 0.00033  | 5.66E-05 |
| regulation of cell cycle                                         | GO:GO:0051726 | 0.002427 | 0.001737 | 0.000598 | 0.000627 |
| RNA ligase (ATP) activity                                        | GO:GO:0003972 | 0.002427 | 0.000807 | 0.000242 | 0.000118 |
| transcription initiation from RNA polymerase II promoter         | GO:GO:0006367 | 0.002427 | 0.002962 | 0.004398 | 0.002107 |
| deoxyribonucleotide metabolism                                   | GO:GO:0009262 | 0.002427 | 0.002987 | 0.00029  | 0.000267 |

|                                                             |               |          |          |          |          |
|-------------------------------------------------------------|---------------|----------|----------|----------|----------|
| signal transduction during conjugation with cellular fusion | GO:GO:0032005 | 0.002427 | 0.000505 | 0.000463 | 0.000577 |
| maintenance of DNA methylation                              | GO:GO:0010216 | 0.002427 | 0.002057 | 0.000157 | 0.000118 |
| peptidyl-proline hydroxylation to 4-hydroxy-L-proline       | GO:GO:0018401 | 0.002427 | 0.000505 | 0.000532 | 0.001054 |
| monovalent inorganic cation transport                       | GO:GO:0015672 | 0.002427 | 0.000505 | 0.000683 | 0.001144 |
| startle response                                            | GO:GO:0001964 | 0.002427 | 0.000505 | 6.5E-05  | 0        |
| positive regulation of protein secretion                    | GO:GO:0050714 | 0.002427 | 0.004138 | 0.00018  | 0.000823 |
| filopodium formation                                        | GO:GO:0046847 | 0.002427 | 0.000807 | 0.00109  | 0.000916 |
| negative regulation of astrocyte differentiation            | GO:GO:0048712 | 0.002427 | 0.000505 | 6.42E-05 | 0        |
| regulation of neuron differentiation                        | GO:GO:0045664 | 0.002427 | 0.000505 | 0.000733 | 0.002055 |
| integral to endoplasmic reticulum membrane                  | GO:GO:0030176 | 0.002427 | 0.001108 | 0.004244 | 0.005401 |
| peptide cross-linking                                       | GO:GO:0018149 | 0.002427 | 0.000505 | 0.000646 | 0.000808 |
| cytosolic small ribosomal subunit (sensu Eukaryota)         | GO:GO:0005843 | 0.002427 | 0.012195 | 0.005726 | 0.001866 |
| purinergic nucleotide receptor activity, G-protein coupled  | GO:GO:0045028 | 0.002427 | 0.003509 | 0.001875 | 0.002748 |
| calcium- and calmodulin-dependent protein kinase activity   | GO:GO:0004685 | 0.002427 | 0.000505 | 0.000142 | 0.000762 |
| regulation of Ras protein signal transduction               | GO:GO:0046578 | 0.002427 | 0.002057 | 0.000101 | 0        |
| transcription-coupled nucleotide-excision repair            | GO:GO:0006283 | 0.002427 | 0.000505 | 0.000372 | 0.000184 |
| connexon complex                                            | GO:GO:0005922 | 0.002427 | 0.000807 | 0.000716 | 0.000387 |
| 'de novo' IMP biosynthesis                                  | GO:GO:0006189 | 0.002427 | 0.00662  | 0.000492 | 0        |
| methylenetetrahydrofolate dehydrogenase (NADP+) activity    | GO:GO:0004488 | 0.002427 | 0.001737 | 0.000404 | 0.000367 |
| glutamate biosynthesis                                      | GO:GO:0006537 | 0.002427 | 0.001108 | 0.001118 | 0.000118 |
| rRNA export from nucleus                                    | GO:GO:0006407 | 0.002427 | 0.002057 | 0.000389 | 0        |
| flap endonuclease activity                                  | GO:GO:0048256 | 0.002427 | 0.002667 | 0.000259 | 0.000149 |
| nucleoside metabolism                                       | GO:GO:0009116 | 0.002427 | 0.001755 | 0.001872 | 0.000994 |
| enzyme activator activity                                   | GO:GO:0008047 | 0.002427 | 0.002667 | 0.004294 | 0.005401 |
| regulation of lipid metabolism                              | GO:GO:0019216 | 0.002427 | 0.001435 | 0.000481 | 0.000758 |
| aster                                                       | GO:GO:0005818 | 0.002427 | 0.001435 | 0        | 0        |
| re-entry into mitotic cell cycle                            | GO:GO:0000320 | 0.002427 | 0.001108 | 0.000866 | 0.000362 |
| metal ion transporter activity                              | GO:GO:0046873 | 0.002427 | 0.001435 | 0.001381 | 0.000638 |
| apical plasma membrane                                      | GO:GO:0016324 | 0.002427 | 0.006318 | 0.004221 | 0.007968 |
| ribonuclease P activity                                     | GO:GO:0004526 | 0.002427 | 0.000505 | 0.000853 | 0.00019  |
| androgen receptor signaling pathway                         | GO:GO:0030521 | 0.002427 | 0.001108 | 0.002108 | 0.001421 |
| Ran GTPase activator activity                               | GO:GO:0005098 | 0.002427 | 0.000807 | 0.000361 | 0.000247 |
| positive regulation of transcription                        | GO:GO:0045941 | 0.002427 | 0.007606 | 0.005912 | 0.007696 |
| prolyl aminopeptidase activity                              | GO:GO:0016804 | 0.002427 | 0.001755 | 0.000107 | 0        |
| dynein binding                                              | GO:GO:0045502 | 0.002427 | 0.001435 | 0.000704 | 0.000541 |
| gene silencing                                              | GO:GO:0016458 | 0.002427 | 0.003208 | 0.000242 | 0.000395 |
| negative regulation of DNA replication                      | GO:GO:0008156 | 0.002427 | 0.002667 | 0.000558 | 0.000619 |
| vesicle fusion                                              | GO:GO:0006906 | 0.002427 | 0.000807 | 0.00151  | 0.00082  |
| lipid biosynthesis                                          | GO:GO:0008610 | 0.002427 | 0.007419 | 0.009152 | 0.005383 |
| embryonic limb morphogenesis                                | GO:GO:0030326 | 0.002427 | 0.00234  | 0.002845 | 0.002708 |
| tryptophan metabolism                                       | GO:GO:0006568 | 0.002427 | 0.000505 | 0.00016  | 0.000449 |
| positive regulation of inflammatory response                | GO:GO:0050729 | 0.002427 | 0.000505 | 0.001273 | 0.001044 |
| stearoyl-CoA 9-desaturase activity                          | GO:GO:0004768 | 0.002427 | 0.000505 | 0.001409 | 0.000851 |

|                                                                   |               |          |          |          |          |
|-------------------------------------------------------------------|---------------|----------|----------|----------|----------|
| tropomyosin binding                                               | GO:GO:0005523 | 0.002427 | 0.002358 | 0.000879 | 0.001039 |
| eukaryotic initiation factor 4E binding                           | GO:GO:0008190 | 0.002427 | 0.000807 | 0.000617 | 0.0001   |
| FAD binding                                                       | GO:GO:0050660 | 0.002427 | 0.000807 | 0.00247  | 0.003554 |
| AMP deaminase activity                                            | GO:GO:0003876 | 0.002427 | 0.000505 | 0.000426 | 0.000446 |
| DNA polymerase processivity factor activity                       | GO:GO:0030337 | 0.002427 | 0.002057 | 0.000716 | 0        |
| protein polymerization                                            | GO:GO:0051258 | 0.002427 | 0.00266  | 0.001554 | 0.00224  |
| deoxyribonucleoside diphosphate metabolism                        | GO:GO:0009186 | 0.002427 | 0.002987 | 0.00029  | 0.000267 |
| positive transcription elongation factor activity                 | GO:GO:0008159 | 0.002427 | 0.000505 | 0.001114 | 0.00058  |
| PCNA complex                                                      | GO:GO:0043626 | 0.002427 | 0.002057 | 0.000656 | 0        |
| positive regulation of cell adhesion                              | GO:GO:0045785 | 0.002427 | 0.000505 | 6.42E-05 | 0.000846 |
| viral capsid assembly                                             | GO:GO:0019069 | 0.002427 | 0.003208 | 0.000302 | 0        |
| cation:chloride symporter activity                                | GO:GO:0015377 | 0.002427 | 0.005388 | 0.00087  | 0.00055  |
| snoRNA binding                                                    | GO:GO:0030515 | 0.002427 | 0.00141  | 0.001007 | 0.000398 |
| spermine biosynthesis                                             | GO:GO:0006597 | 0.002427 | 0.000505 | 0.000385 | 9.15E-05 |
| strand invasion                                                   | GO:GO:0042148 | 0.002427 | 0.001435 | 9.19E-05 | 0.000249 |
| nuclear envelope lumen                                            | GO:GO:0005641 | 0.002427 | 0.000505 | 0.000587 | 0.000715 |
| lateral plasma membrane                                           | GO:GO:0016328 | 0.002427 | 0.000807 | 0.00058  | 0.000634 |
| UV protection                                                     | GO:GO:0009650 | 0.002427 | 0.001737 | 0.000481 | 0.000149 |
| polyribonucleotide nucleotidyltransferase activity                | GO:GO:0004654 | 0.002427 | 0.000505 | 8.85E-05 | 0        |
| response to toxin                                                 | GO:GO:0009636 | 0.002427 | 0.000505 | 0.001543 | 0.002586 |
| receptor signaling complex scaffold activity                      | GO:GO:0030159 | 0.002427 | 0.002057 | 0.00044  | 0.000916 |
| pyrimidine ribonucleoside triphosphate biosynthesis               | GO:GO:0009209 | 0.002427 | 0.001737 | 0.000656 | 0.000596 |
| protein phosphatase inhibitor activity                            | GO:GO:0004864 | 0.002427 | 0.002057 | 0.000729 | 0.000701 |
| protein amino acid O-linked glycosylation                         | GO:GO:0006493 | 0.002427 | 0.003208 | 0.00179  | 0.001606 |
| caspase activation                                                | GO:GO:0006919 | 0.002427 | 0.00234  | 0.002998 | 0.001197 |
| telomere maintenance via recombination                            | GO:GO:0000722 | 0.002427 | 0.001435 | 0.000216 | 0.00033  |
| rhythmic process                                                  | GO:GO:0048511 | 0.002427 | 0.000505 | 0.001018 | 0.001873 |
| odontogenesis (sensu Vertebrata)                                  | GO:GO:0042475 | 0.002427 | 0.001108 | 0.002761 | 0.001774 |
| dopamine uptake                                                   | GO:GO:0051583 | 0.002427 | 0.000505 | 0.000225 | 0        |
| ESC/E(Z) complex                                                  | GO:GO:0035098 | 0.002427 | 0.003307 | 0.000509 | 0.000385 |
| protein amino acid N-linked glycosylation via asparagine          | GO:GO:0018279 | 0.002427 | 0.000505 | 0.001244 | 0.000658 |
| citrate metabolism                                                | GO:GO:0006101 | 0.002427 | 0.000505 | 0.00058  | 0.000665 |
| DNA ligase (NAD+) activity                                        | GO:GO:0003911 | 0.002427 | 0.000505 | 0.000227 | 0        |
| defense response to pathogenic bacteria, incompatible interaction | GO:GO:0009816 | 0.002427 | 0.003208 | 0.000217 | 0.000184 |
| carrier activity                                                  | GO:GO:0005386 | 0.002427 | 0.006318 | 0.005494 | 0.006211 |
| chorion gene amplification                                        | GO:GO:0007307 | 0.002427 | 0.004237 | 0.000627 | 0.000293 |
| RNA localization                                                  | GO:GO:0006403 | 0.002427 | 0.000905 | 0.001374 | 0.00059  |
| ubiquitin binding                                                 | GO:GO:0043130 | 0.002427 | 0.002358 | 0.000962 | 0.001883 |
| exocytosis                                                        | GO:GO:0006887 | 0.002427 | 0.003289 | 0.004045 | 0.005014 |
| adenosine deaminase activity                                      | GO:GO:0004000 | 0.002427 | 0.000505 | 0.000696 | 0.000362 |
| translation elongation factor activity                            | GO:GO:0003746 | 0.002427 | 0.006275 | 0.004644 | 0.002666 |
| regulation of body size                                           | GO:GO:0040014 | 0.002427 | 0.000505 | 0.002119 | 0.00246  |
| skeletal development                                              | GO:GO:0001501 | 0.002427 | 0.005106 | 0.00764  | 0.009935 |
| protein import into nucleus, translocation                        | GO:GO:0000060 | 0.002427 | 0.002642 | 0.001513 | 0.000497 |
| negative regulation of neuron apoptosis                           | GO:GO:0043524 | 0.002427 | 0.001712 | 0.001413 | 0.001551 |

|                                                                                       |               |          |          |          |          |
|---------------------------------------------------------------------------------------|---------------|----------|----------|----------|----------|
| epidermal growth factor receptor binding                                              | GO:GO:0005154 | 0.002427 | 0.000807 | 0.000854 | 0.001012 |
| cytosolic ribosome (sensu Eukaryota)                                                  | GO:GO:0005830 | 0.002427 | 0.014401 | 0.009978 | 0.002584 |
| tumor necrosis factor receptor activity                                               | GO:GO:0005031 | 0.002427 | 0.000505 | 0.000273 | 0.000276 |
| positive regulation of nitric-oxide synthase activity                                 | GO:GO:0051000 | 0.002427 | 0.000505 | 0        | 0.000289 |
| protein amino acid N-linked glycosylation                                             | GO:GO:0006487 | 0.002427 | 0.001435 | 0.001945 | 0.002674 |
| cell septum                                                                           | GO:GO:0030428 | 0.002427 | 0.000807 | 0.000436 | 5.66E-05 |
| oligosaccharide biosynthesis                                                          | GO:GO:0009312 | 0.002427 | 0.000505 | 0.000642 | 0.000914 |
| sarcomere                                                                             | GO:GO:0030017 | 0.002427 | 0.000807 | 0.00122  | 0.001303 |
| vacuole (sensu Fungi)                                                                 | GO:GO:0000324 | 0.002427 | 0.002039 | 0.000641 | 0.000849 |
| myo-inositol metabolism                                                               | GO:GO:0006020 | 0.002427 | 0.000505 | 0.000199 | 0.000389 |
| pronucleus                                                                            | GO:GO:0045120 | 0.002427 | 0.004539 | 0.00118  | 0.000542 |
| prefoldin complex                                                                     | GO:GO:0016272 | 0.002427 | 0.003208 | 0.000767 | 0.000425 |
| lipoate-protein ligase B activity                                                     | GO:GO:0016978 | 0.002427 | 0.001755 | 0.000222 | 0.000148 |
| heteroduplex formation                                                                | GO:GO:0030491 | 0.002427 | 0.001435 | 9.19E-05 | 0.000249 |
| protein targeting to lysosome                                                         | GO:GO:0006622 | 0.002427 | 0.000505 | 0.000585 | 0.000402 |
| gastric acid secretion                                                                | GO:GO:0001696 | 0.002427 | 0.000505 | 0.000135 | 0.0001   |
| protein homooligomerization                                                           | GO:GO:0051260 | 0.002427 | 0.000505 | 0.001681 | 0.00189  |
| regulation of axonogenesis                                                            | GO:GO:0050770 | 0.002427 | 0.00444  | 0.000786 | 0.001161 |
| ureteric bud branching                                                                | GO:GO:0001658 | 0.002427 | 0.00591  | 0.001567 | 0.00135  |
| ATPase activity, coupled to transmembrane movement of ions, phosphorylative mechanism | GO:GO:0015662 | 0.002427 | 0.001435 | 0.002208 | 0.002769 |
| regulation of bone mineralization                                                     | GO:GO:0030500 | 0.002427 | 0.000505 | 0.000241 | 0.000369 |
| cytokinesis after mitosis                                                             | GO:GO:0000281 | 0.002427 | 0.001737 | 0.000211 | 0.000267 |
| positive regulation of mitosis                                                        | GO:GO:0045840 | 0.002427 | 0.002667 | 0.000749 | 0.000684 |
| response to virus                                                                     | GO:GO:0009615 | 0.002427 | 0.002358 | 0.002719 | 0.004995 |
| DNA topoisomerase activity                                                            | GO:GO:0003916 | 0.002427 | 0.005345 | 0.001536 | 0.000521 |
| mannose binding                                                                       | GO:GO:0005537 | 0.002427 | 0.000807 | 0.000481 | 0.000603 |
| neuron projection                                                                     | GO:GO:0043005 | 0.002427 | 0.001435 | 0.001988 | 0.003284 |
| regulation of synaptic transmission                                                   | GO:GO:0050804 | 0.002427 | 0.000505 | 0.000129 | 0.000356 |
| ceramide metabolism                                                                   | GO:GO:0006672 | 0.002427 | 0.000505 | 0.000776 | 0.00125  |
| SLIK (SAGA-like) complex                                                              | GO:GO:0046695 | 0.002427 | 0.002057 | 0.001245 | 0.000341 |
| transmembrane receptor protein tyrosine phosphatase activity                          | GO:GO:0005001 | 0.002427 | 0.001737 | 0.000879 | 0.001972 |
| synaptic transmission                                                                 | GO:GO:0007268 | 0.002427 | 0.00234  | 0.005297 | 0.014005 |
| primary spermatocyte growth                                                           | GO:GO:0007285 | 0.002427 | 0.000505 | 3.47E-05 | 0        |
| tubulin binding                                                                       | GO:GO:0015631 | 0.002427 | 0.002987 | 0.000919 | 0.000684 |
| protein kinase C activity                                                             | GO:GO:0004697 | 0.002427 | 0.000505 | 0.000787 | 0.001743 |
| Barr body                                                                             | GO:GO:0001740 | 0.002427 | 0.000905 | 0.001192 | 0.000502 |
| amino acid transport                                                                  | GO:GO:0006865 | 0.002427 | 0.005388 | 0.002764 | 0.003406 |
| sulfur amino acid biosynthesis                                                        | GO:GO:0000097 | 0.002427 | 0.000505 | 6.42E-05 | 0        |
| induction of positive chemotaxis                                                      | GO:GO:0050930 | 0.002427 | 0.000505 | 0.000538 | 0.00096  |
| recombinase activity                                                                  | GO:GO:0000150 | 0.002427 | 0.001435 | 0.000181 | 0.00033  |
| protein-hormone receptor activity                                                     | GO:GO:0016500 | 0.002427 | 0.001755 | 0.0002   | 0.00033  |
| galactose metabolism                                                                  | GO:GO:0006012 | 0.002427 | 0.000505 | 0.000644 | 0.001152 |
| protein kinase cascade                                                                | GO:GO:0007243 | 0.002427 | 0.001435 | 0.005276 | 0.007724 |
| blastoderm segmentation                                                               | GO:GO:0007350 | 0.002427 | 0.001737 | 0.000855 | 0.00053  |
| M phase specific microtubule process                                                  | GO:GO:0000072 | 0.002427 | 0.00141  | 0.000651 | 0.000671 |
| cysteine dioxygenase activity                                                         | GO:GO:0017172 | 0.002427 | 0.000505 | 6.42E-05 | 0        |
| vacuolar lumen (sensu Fungi)                                                          | GO:GO:0000328 | 0.002427 | 0.001108 | 0.000535 | 0.000451 |

|                                                          |               |          |          |          |          |
|----------------------------------------------------------|---------------|----------|----------|----------|----------|
| nuclear matrix                                           | GO:GO:0016363 | 0.002427 | 0.00537  | 0.001796 | 0.000704 |
| STAT protein nuclear translocation                       | GO:GO:0007262 | 0.002427 | 0.000807 | 0.000943 | 0.00075  |
| neutral amino acid transporter activity                  | GO:GO:0015175 | 0.002427 | 0.001435 | 0.00111  | 0.001496 |
| axonemal dynein complex                                  | GO:GO:0005858 | 0.002427 | 0        | 0.000381 | 0.000339 |
| insulin-like growth factor receptor signaling pathway    | GO:GO:0048009 | 0.002427 | 0.000807 | 0.000729 | 0.000543 |
| DNA replication checkpoint                               | GO:GO:0000076 | 0.002427 | 0.001737 | 0.0011   | 0.000704 |
| heterochromatin                                          | GO:GO:0000792 | 0.002427 | 0.003892 | 0.002091 | 0.001778 |
| olfactory receptor activity                              | GO:GO:0004984 | 0.002427 | 0.000505 | 0.000202 | 0.000634 |
| clathrin vesicle coat                                    | GO:GO:0030125 | 0.002427 | 0.000505 | 0.002543 | 0.002865 |
| G1 phase of mitotic cell cycle                           | GO:GO:0000080 | 0.002427 | 0.005991 | 0.002005 | 0.001088 |
| nucleotide kinase activity                               | GO:GO:0019201 | 0.002427 | 0.002057 | 0.000944 | 0.001228 |
| Rho protein signal transduction                          | GO:GO:0007266 | 0.002427 | 0.001712 | 0.003215 | 0.005862 |
| hydrolase activity, hydrolyzing O-glycosyl compounds     | GO:GO:0004553 | 0.002427 | 0.000505 | 0.002204 | 0.002076 |
| indoleamine-pyrrole 2,3-dioxygenase activity             | GO:GO:0004426 | 0.002427 | 0.000505 | 6.42E-05 | 0.000392 |
| embryonic eye morphogenesis                              | GO:GO:0048048 | 0.002427 | 0.00234  | 0.001345 | 0.000628 |
| exosome (RNase complex)                                  | GO:GO:0000178 | 0.002427 | 0.004335 | 0.004733 | 0.003425 |
| B cell differentiation                                   | GO:GO:0030183 | 0.002427 | 0.000807 | 0.000764 | 0.001006 |
| alpha-beta T cell activation                             | GO:GO:0046631 | 0.002427 | 0.000505 | 8.67E-05 | 0.000353 |
| cadherin binding                                         | GO:GO:0045296 | 0.002427 | 0.001108 | 0.000177 | 0.000664 |
| cell redox homeostasis                                   | GO:GO:0045454 | 0.002427 | 0.00391  | 0.002281 | 0.000517 |
| angiogenesis                                             | GO:GO:0001525 | 0.002427 | 0.002039 | 0.00892  | 0.010058 |
| negative regulation of protein biosynthesis              | GO:GO:0017148 | 0.002427 | 0.000807 | 0.000619 | 0.000369 |
| nuclear inner membrane                                   | GO:GO:0005637 | 0.002427 | 0.004539 | 0.002159 | 0.00112  |
| TATA-binding protein binding                             | GO:GO:0017025 | 0.002427 | 0.002358 | 0.001379 | 0.000151 |
| bleomycin hydrolase activity                             | GO:GO:0008423 | 0.002427 | 0.000505 | 0.000359 | 0        |
| cobalt ion binding                                       | GO:GO:0050897 | 0.002427 | 0.001435 | 0.001255 | 0.001285 |
| mitotic spindle organization and biogenesis              | GO:GO:0007052 | 0.002427 | 0.002057 | 0.00082  | 0.000456 |
| hydroxymethyl-, formyl- and related transferase activity | GO:GO:0016742 | 0.002427 | 0.000807 | 0.000239 | 0.000246 |
| fin regeneration                                         | GO:GO:0031101 | 0.002427 | 0.000807 | 0.000376 | 0.0001   |
| gamma-aminobutyric acid signaling pathway                | GO:GO:0007214 | 0.002427 | 0.005388 | 0.001009 | 0.001329 |
| adenylate kinase activity                                | GO:GO:0004017 | 0.002427 | 0.002057 | 0.000885 | 0.000533 |
| female pronucleus                                        | GO:GO:0001939 | 0.002427 | 0        | 0.00028  | 0.000118 |
| linoleoyl-CoA desaturase activity                        | GO:GO:0016213 | 0.002427 | 0.000505 | 0.000336 | 0        |
| multidimensional cell growth                             | GO:GO:0009825 | 0.002427 | 0.000505 | 0.000404 | 0.000619 |
| synaptic transmission, glutamatergic                     | GO:GO:0035249 | 0.002427 | 0.000505 | 6.5E-05  | 5.66E-05 |
| snoRNP binding                                           | GO:GO:0030519 | 0.002427 | 0.001737 | 0.000577 | 0.000184 |
| biosynthesis                                             | GO:GO:0009058 | 0.002427 | 0.003811 | 0.00445  | 0.003322 |
| phosphoribosylamine-glycine ligase activity              | GO:GO:0004637 | 0.002427 | 0.000807 | 0.000357 | 0        |
| chaperone binding                                        | GO:GO:0051087 | 0.002427 | 0.001108 | 0.001073 | 0.000163 |
| ATPase activity, coupled                                 | GO:GO:0042623 | 0.002427 | 0.00141  | 0.001709 | 0.000483 |
| negative regulation of neuron differentiation            | GO:GO:0045665 | 0.002427 | 0.002642 | 0.002785 | 0.001122 |
| cell migration                                           | GO:GO:0016477 | 0.002427 | 0.001737 | 0.00378  | 0.006862 |
| cell projection biogenesis                               | GO:GO:0030031 | 0.002427 | 0.000807 | 0.001013 | 0.001901 |
| nucleoside triphosphate biosynthesis                     | GO:GO:0009142 | 0.002427 | 0.001435 | 0.000296 | 0        |
| meiotic chromosome segregation                           | GO:GO:0045132 | 0.002427 | 0.000505 | 0.000375 | 0.000341 |
| negative regulation of translational initiation          | GO:GO:0045947 | 0.002427 | 0.000807 | 0.00058  | 0.000319 |
| cell wall (sensu Fungi)                                  | GO:GO:0009277 | 0.002427 | 0.003208 | 0.002139 | 0.000659 |
| Golgi medial cisterna                                    | GO:GO:0005797 | 0.002427 | 0.000505 | 0.00052  | 0.00093  |

|                                                                                   |               |          |          |          |          |
|-----------------------------------------------------------------------------------|---------------|----------|----------|----------|----------|
| paraxial mesoderm development                                                     | GO:GO:0048339 | 0.002427 | 0.000505 | 0.000126 | 0        |
| L-serine catabolism                                                               | GO:GO:0006565 | 0.002427 | 0.001755 | 0.000423 | 0        |
| actin filament polymerization                                                     | GO:GO:0030041 | 0.002427 | 0.000807 | 0.001744 | 0.003513 |
| main pathways of carbohydrate metabolism                                          | GO:GO:0006092 | 0.002427 | 0.001108 | 0.001138 | 0.000743 |
| male genitalia development                                                        | GO:GO:0030539 | 0.002427 | 0.000807 | 0.000651 | 0.000566 |
| sex chromatin                                                                     | GO:GO:0001739 | 0.002427 | 0.001755 | 0.000955 | 0.000118 |
| protein disulfide isomerase activity                                              | GO:GO:0003756 | 0.002427 | 0.000807 | 0.000677 | 0.000972 |
| nuclear heterochromatin                                                           | GO:GO:0005720 | 0.002427 | 0.000807 | 0.001454 | 0.000959 |
| oxidoreductase activity, acting on iron-sulfur proteins as donors                 | GO:GO:0016730 | 0.002427 | 0        | 3.29E-05 | 0.000308 |
| Nup107-160 complex                                                                | GO:GO:0031080 | 0.002427 | 0.000807 | 0.000266 | 0        |
| peptidyl-threonine phosphorylation                                                | GO:GO:0018107 | 0.002427 | 0.001755 | 0.000892 | 6.41E-05 |
| polynucleotide adenylyltransferase activity                                       | GO:GO:0004652 | 0.002427 | 0.001755 | 0.00053  | 0.000683 |
| L-cysteine catabolism to taurine                                                  | GO:GO:0019452 | 0.002427 | 0.000505 | 0.000277 | 0        |
| regulation of JAK-STAT cascade                                                    | GO:GO:0046425 | 0.002427 | 0.000505 | 0.000582 | 5.66E-05 |
| positive regulation of smooth muscle cell proliferation                           | GO:GO:0048661 | 0.002427 | 0.000505 | 0.000833 | 0.00043  |
| chromatin silencing                                                               | GO:GO:0006342 | 0.002427 | 0.001755 | 0.001041 | 0.000667 |
| dynein complex                                                                    | GO:GO:0030286 | 0.002427 | 0.000302 | 0.001298 | 0.001332 |
| delta DNA polymerase activity                                                     | GO:GO:0003891 | 0.002427 | 0.004237 | 0.000532 | 0.000477 |
| nucleosome                                                                        | GO:GO:0000786 | 0.002427 | 0.006632 | 0.004317 | 0.003977 |
| ribonucleoside-diphosphate reductase complex                                      | GO:GO:0005971 | 0.002427 | 0.003509 | 0.000442 | 0.000118 |
| auxin polar transport                                                             | GO:GO:0009926 | 0.002427 | 0.001737 | 0.000562 | 9.87E-05 |
| female meiosis chromosome segregation                                             | GO:GO:0016321 | 0.002427 | 0.000505 | 0.000174 | 0.000118 |
| insoluble fraction                                                                | GO:GO:0005626 | 0.002427 | 0.003296 | 0.002908 | 0.003999 |
| pyrimidine nucleotide biosynthesis                                                | GO:GO:0006221 | 0.002427 | 0.001755 | 0.001741 | 0.000544 |
| cortical actin cytoskeleton                                                       | GO:GO:0030864 | 0.002427 | 0.001737 | 0.001385 | 0.001551 |
| vasodilation                                                                      | GO:GO:0042311 | 0.002427 | 0.000505 | 0.000696 | 0.0001   |
| glucose metabolism                                                                | GO:GO:0006006 | 0.002427 | 0.004759 | 0.00221  | 0.003733 |
| gap junction                                                                      | GO:GO:0005921 | 0.002427 | 0.000807 | 0.000867 | 0.000478 |
| urogenital system development                                                     | GO:GO:0001655 | 0.002427 | 0.004458 | 0.000553 | 0.000157 |
| carboxypeptidase activity                                                         | GO:GO:0004180 | 0.002427 | 0.000505 | 0.002086 | 0.004052 |
| neuroblast proliferation (sensu Vertebrata)                                       | GO:GO:0043350 | 0.002427 | 0.000807 | 0.000383 | 0.000151 |
| extracellular matrix structural constituent                                       | GO:GO:0005201 | 0.002427 | 0.004528 | 0.00497  | 0.007423 |
| entry of virus into host cell                                                     | GO:GO:0046718 | 0.002427 | 0.000505 | 0.000688 | 0.000683 |
| telomere cap complex                                                              | GO:GO:0000782 | 0.002427 | 0        | 6.42E-05 | 0        |
| regulation of cell migration                                                      | GO:GO:0030334 | 0.002427 | 0.001737 | 0.004167 | 0.004015 |
| septation initiation signaling                                                    | GO:GO:0031028 | 0.002427 | 0.001435 | 0.000347 | 0.000267 |
| chloroplast                                                                       | GO:GO:0009507 | 0.002427 | 0.00537  | 0.001812 | 0.001246 |
| cytoplasmic dynein complex                                                        | GO:GO:0005868 | 0.002427 | 0.000302 | 0.000467 | 0.001234 |
| response to pathogenic fungi                                                      | GO:GO:0009621 | 0.002427 | 0.000505 | 0.000225 | 0        |
| regulation of smooth muscle contraction                                           | GO:GO:0006940 | 0.002427 | 0.001435 | 0.000512 | 0.000398 |
| hyperosmotic response                                                             | GO:GO:0006972 | 0.002427 | 0.005388 | 0.000629 | 0.00063  |
| regulation of mitosis                                                             | GO:GO:0007088 | 0.002427 | 0.00359  | 0.00124  | 0.000958 |
| protein oligomerization                                                           | GO:GO:0051259 | 0.002427 | 0.000505 | 0.000685 | 0.00056  |
| dicarboxylic acid transport                                                       | GO:GO:0006835 | 0.002427 | 0.000505 | 0.000569 | 0.000742 |
| positive regulation of embryonic development                                      | GO:GO:0040019 | 0.002427 | 0.000505 | 0.000476 | 5.66E-05 |
| deoxyribonuclease activity                                                        | GO:GO:0004536 | 0.002427 | 0.001435 | 0.000329 | 0.000297 |
| negative regulation of transforming growth factor beta receptor signaling pathway | GO:GO:0030512 | 0.002427 | 0.002057 | 0.000396 | 0.000192 |

|                                                     |               |          |          |          |          |
|-----------------------------------------------------|---------------|----------|----------|----------|----------|
| nucleoside-diphosphatase activity                   | GO:GO:0017110 | 0.002427 | 0.000505 | 0.000662 | 0.002213 |
| ribosome assembly                                   | GO:GO:0042255 | 0.002427 | 0.002057 | 0.000805 | 0.0001   |
| exodeoxyribonuclease activity                       | GO:GO:0004529 | 0.002427 | 0.001737 | 0.000321 | 0.000149 |
| connexon channel activity                           | GO:GO:0015285 | 0.002427 | 0.000807 | 0.000716 | 0.000387 |
| 5'-3' exonuclease activity                          | GO:GO:0008409 | 0.002427 | 0.002667 | 0.000323 | 0.000149 |
| metallochaperone activity                           | GO:GO:0016530 | 0.002427 | 0.003208 | 0.000233 | 0.000364 |
| protein amino acid acetylation                      | GO:GO:0006473 | 0.002427 | 0.002057 | 0.00079  | 0.000755 |
| insulin-like growth factor binding protein complex  | GO:GO:0016942 | 0.002427 | 0.000505 | 0.000228 | 0.00032  |
| transcription elongation factor complex             | GO:GO:0008023 | 0.002427 | 0.000505 | 0.00229  | 0.001358 |
| fatty acid metabolism                               | GO:GO:0006631 | 0.002427 | 0.000505 | 0.006838 | 0.007509 |
| nuclear outer membrane                              | GO:GO:0005640 | 0.002427 | 0.000505 | 0.000597 | 0.000798 |
| chaperonin-containing T-complex                     | GO:GO:0005832 | 0.002427 | 0.002962 | 0.002852 | 0.000389 |
| adult somatic muscle development                    | GO:GO:0007527 | 0.002427 | 0.000505 | 0.000442 | 0.000326 |
| serine-type endopeptidase inhibitor activity        | GO:GO:0004867 | 0.002427 | 0.001737 | 0.004779 | 0.007979 |
| S-adenosylmethionine metabolism                     | GO:GO:0046500 | 0.002427 | 0.002366 | 0.000559 | 0.000903 |
| purine ribonucleoside monophosphate biosynthesis    | GO:GO:0009168 | 0.002427 | 0.000505 | 0.000435 | 0.000411 |
| central element                                     | GO:GO:0000801 | 0.002427 | 0.003208 | 0.000347 | 0        |
| cell junction                                       | GO:GO:0030054 | 0.002427 | 0.000807 | 0.000718 | 0.000818 |
| mitotic checkpoint                                  | GO:GO:0007093 | 0.002427 | 0.001108 | 0.000764 | 0.000802 |
| DNA topological change                              | GO:GO:0006265 | 0.002427 | 0.003289 | 0.001705 | 0.000521 |
| pyrimidine nucleotide binding                       | GO:GO:0019103 | 0.002427 | 0.000505 | 0.000101 | 0.000149 |
| protein phosphatase type 1 regulator activity       | GO:GO:0008599 | 0.002427 | 0.002057 | 0.001093 | 0.000481 |
| cAMP-mediated signaling                             | GO:GO:0019933 | 0.002427 | 0.000807 | 0.000624 | 0.001736 |
| fat cell differentiation                            | GO:GO:0045444 | 0.002427 | 0.000807 | 0.001552 | 0.001235 |
| nucleoside diphosphate kinase activity              | GO:GO:0004550 | 0.002427 | 0.001737 | 0.001167 | 0.000832 |
| response to oxidative stress                        | GO:GO:0006979 | 0.002427 | 0.004175 | 0.009496 | 0.01168  |
| glutamate-5-semialdehyde dehydrogenase activity     | GO:GO:0004350 | 0.002427 | 0.000505 | 3.29E-05 | 0        |
| Cajal body                                          | GO:GO:0015030 | 0.002427 | 0.000807 | 0.001286 | 0.000213 |
| nuclear localization sequence binding               | GO:GO:0008139 | 0.002427 | 0.005043 | 0.001443 | 0.000667 |
| insulin receptor binding                            | GO:GO:0005158 | 0.002427 | 0.000505 | 0.000838 | 0.000804 |
| protein localization                                | GO:GO:0008104 | 0.002427 | 0.006293 | 0.004082 | 0.002638 |
| DNA-directed RNA polymerase II, core complex        | GO:GO:0005665 | 0.002427 | 0.000807 | 0.001092 | 0.000963 |
| site of polarized growth                            | GO:GO:0030427 | 0.002427 | 0.000807 | 0.000607 | 0.000577 |
| response to antibiotic                              | GO:GO:0046677 | 0.002427 | 0.000505 | 0.000386 | 0.000708 |
| purine base metabolism                              | GO:GO:0006144 | 0.002427 | 0.000505 | 0.000706 | 0.00103  |
| dense fibrillar component                           | GO:GO:0001651 | 0.002427 | 0.001108 | 0.000655 | 0.000113 |
| transmembrane receptor activity                     | GO:GO:0004888 | 0.002427 | 0.003289 | 0.004343 | 0.008346 |
| lamin binding                                       | GO:GO:0005521 | 0.002427 | 0.003289 | 0.000783 | 0.000534 |
| amino acid-polyamine transporter activity           | GO:GO:0005279 | 0.002427 | 0.005388 | 0.001883 | 0.001174 |
| cysteine metabolism                                 | GO:GO:0006534 | 0.002427 | 0.000505 | 0.000437 | 0.000589 |
| protein amino acid terminal N-glycosylation         | GO:GO:0006496 | 0.002427 | 0.000505 | 0.00024  | 0.000155 |
| malate metabolism                                   | GO:GO:0006108 | 0.002427 | 0        | 0.000577 | 0.000575 |
| negative regulation of signal transduction          | GO:GO:0009968 | 0.002427 | 0.000505 | 0.003425 | 0.003525 |
| endocytic vesicle                                   | GO:GO:0030139 | 0.002427 | 0.000505 | 0.001529 | 0.001744 |
| autophagy                                           | GO:GO:0006914 | 0.002427 | 0.000807 | 0.001572 | 0.002698 |
| positive regulation of transcription, DNA-dependent | GO:GO:0045893 | 0.002427 | 0.006349 | 0.008374 | 0.007112 |

|                                                                                                            |               |          |          |          |          |
|------------------------------------------------------------------------------------------------------------|---------------|----------|----------|----------|----------|
| hydrolase activity, acting on carbon-nitrogen (but not peptide) bonds, in cyclic amidines nuclear membrane | GO:GO:0016814 | 0.002427 | 0.000505 | 0.000167 | 0.000659 |
| regulation of cyclin-dependent protein kinase activity                                                     | GO:GO:0031965 | 0.002427 | 0.000807 | 0.000874 | 0.000313 |
| L-cysteine metabolism                                                                                      | GO:GO:0000079 | 0.002427 | 0.00234  | 0.002824 | 0.002775 |
| Hsp70 protein binding                                                                                      | GO:GO:0046439 | 0.002427 | 0.000505 | 6.42E-05 | 0        |
| cell communication                                                                                         | GO:GO:0030544 | 0.002427 | 0.001108 | 0.000747 | 0.000516 |
| zinc ion transporter activity                                                                              | GO:GO:0007154 | 0.002427 | 0.002039 | 0.002577 | 0.000987 |
| telomeric 3' overhang formation                                                                            | GO:GO:0005385 | 0.002427 | 0.001435 | 0.001529 | 0.001757 |
| GMP biosynthesis                                                                                           | GO:GO:0031860 | 0.002427 | 0        | 6.42E-05 | 0        |
| response to methylmercury                                                                                  | GO:GO:0006177 | 0.002427 | 0.002987 | 0.000535 | 0.00029  |
| transaminase activity                                                                                      | GO:GO:0051597 | 0.002427 | 0.002366 | 0.001651 | 0.001428 |
| chemokine receptor binding                                                                                 | GO:GO:0008483 | 0.002427 | 0.000807 | 0.002665 | 0.001185 |
| circulation                                                                                                | GO:GO:0042379 | 0.002427 | 0.000505 | 0        | 0        |
| tryptophanyl-tRNA aminoacylation                                                                           | GO:GO:0008015 | 0.002427 | 0.000505 | 0.002103 | 0.005877 |
| malate dehydrogenase (decarboxylating) activity                                                            | GO:GO:0006436 | 0.002427 | 0.000505 | 0.000426 | 9.15E-05 |
| lamellipodium                                                                                              | GO:GO:0004471 | 0.002427 | 0        | 0.000235 | 5.66E-05 |
| lipid metabolism                                                                                           | GO:GO:0030027 | 0.002427 | 0.005018 | 0.006951 | 0.007132 |
| catecholamine biosynthesis                                                                                 | GO:GO:0006629 | 0.002427 | 0.015092 | 0.016106 | 0.023396 |
| spermidine biosynthesis                                                                                    | GO:GO:0042423 | 0.002427 | 0.000505 | 0.000143 | 0.000951 |
| proximal/distal pattern formation                                                                          | GO:GO:0008295 | 0.002427 | 0.000505 | 0.000887 | 0.00029  |
| epsilon DNA polymerase complex                                                                             | GO:GO:0009954 | 0.002427 | 0.001737 | 0.000174 | 0.000199 |
| NuRD complex                                                                                               | GO:GO:0008622 | 0.002427 | 0.002667 | 0.000457 | 0.000149 |
| regulation of protein amino acid phosphorylation                                                           | GO:GO:0016581 | 0.002427 | 0.001712 | 0.001418 | 0.000389 |
| mannosyltransferase activity                                                                               | GO:GO:0001932 | 0.002427 | 0.000505 | 0.000786 | 0.000861 |
| protein kinase activator activity                                                                          | GO:GO:0000030 | 0.002427 | 0.000505 | 0.000202 | 0.000405 |
| sodium:potassium:chloride symporter activity                                                               | GO:GO:0030295 | 0.002427 | 0.000505 | 0.000584 | 0.000722 |
| rRNA binding                                                                                               | GO:GO:0008511 | 0.002427 | 0.005388 | 0.000423 | 5.66E-05 |
| chromatin assembly complex                                                                                 | GO:GO:0019843 | 0.002427 | 0.006374 | 0.004217 | 0.000278 |
| ribulose-phosphate 3-epimerase activity                                                                    | GO:GO:0005678 | 0.002427 | 0.002057 | 0.00112  | 0.000262 |
| transmembrane receptor protein tyrosine phosphatase signaling pathway                                      | GO:GO:0004750 | 0.002427 | 0.000505 | 7.18E-05 | 0        |
| negative regulation of vasodilation                                                                        | GO:GO:0007185 | 0.002427 | 0.001737 | 0.00264  | 0.003322 |
| positive regulation of cell volume                                                                         | GO:GO:0045908 | 0.002427 | 0.000505 | 4.23E-05 | 0.000479 |
| vesicular fraction                                                                                         | GO:GO:0045795 | 0.002427 | 0.005388 | 0.000382 | 0        |
| phosphoric monoester hydrolase activity                                                                    | GO:GO:0042598 | 0.002427 | 0.000505 | 0.000492 | 0.000113 |
| phosphoenolpyruvate carboxykinase (GTP) activity                                                           | GO:GO:0016791 | 0.002427 | 0.000505 | 0.001135 | 0.00085  |
| axonogenesis                                                                                               | GO:GO:0004613 | 0.002427 | 0.000505 | 0.00019  | 0.000157 |
| metal ion transport                                                                                        | GO:GO:0007409 | 0.002427 | 0.00266  | 0.004528 | 0.004988 |
| double-strand break repair via single-strand annealing                                                     | GO:GO:0030001 | 0.002427 | 0.001435 | 0.001705 | 0.000638 |
| neuron migration                                                                                           | GO:GO:0045002 | 0.002427 | 0.001435 | 0.000152 | 0.00033  |
| transcription initiation                                                                                   | GO:GO:0001764 | 0.002427 | 0.002944 | 0.006081 | 0.005092 |
| response to cadmium ion                                                                                    | GO:GO:0006352 | 0.002427 | 0.003289 | 0.001365 | 0.000796 |
| N-methyltransferase activity                                                                               | GO:GO:0046686 | 0.002427 | 0.001435 | 0.001871 | 0.001613 |
|                                                                                                            | GO:GO:0008170 | 0.002427 | 0.002667 | 0.000836 | 0.000885 |



|                                                                           |               |          |          |          |          |
|---------------------------------------------------------------------------|---------------|----------|----------|----------|----------|
| release of cytoplasmic sequestered NF-kappaB                              | GO:GO:0008588 | 0.002427 | 0.000505 | 0.000477 | 0.000123 |
| regulation of DNA replication initiation                                  | GO:GO:0030174 | 0.002427 | 0.002057 | 0.000222 | 0        |
| large ribosomal subunit                                                   | GO:GO:0015934 | 0.002427 | 0.003892 | 0.004048 | 0.000849 |
| calcium-activated potassium channel activity                              | GO:GO:0015269 | 0.002427 | 0.005068 | 0.000196 | 0.000592 |
| procollagen-proline 4-dioxygenase activity                                | GO:GO:0004656 | 0.002427 | 0.000505 | 0.000532 | 0.001054 |
| cation transport                                                          | GO:GO:0006812 | 0.002427 | 0.002366 | 0.004087 | 0.007374 |
| S-methyl-5-thioadenosine phosphorylase activity                           | GO:GO:0017061 | 0.002427 | 0.000505 | 0.000102 | 0        |
| mitotic nuclear envelope reassembly                                       | GO:GO:0007084 | 0.002427 | 0.002358 | 0.000746 | 0.000802 |
| histone methyltransferase activity                                        | GO:GO:0042054 | 0.002427 | 0.003608 | 0.000888 | 0.000639 |
| negative regulation of retinal programmed cell death                      | GO:GO:0046671 | 0.002427 | 0.000807 | 0.000647 | 0.000197 |
| galactokinase activity                                                    | GO:GO:0004335 | 0.002427 | 0.000505 | 0.000369 | 0.0001   |
| regulation of stomatal movement                                           | GO:GO:0010119 | 0.002427 | 0.001737 | 0.000362 | 9.87E-05 |
| phosphatidate phosphatase activity                                        | GO:GO:0008195 | 0.002427 | 0.000505 | 0.000217 | 0.000399 |
| regulation of muscle contraction                                          | GO:GO:0006937 | 0.002427 | 0.000505 | 0.002061 | 0.003677 |
| lactation                                                                 | GO:GO:0007595 | 0.002427 | 0.001435 | 0.000946 | 0.001158 |
| SWI/SNF complex                                                           | GO:GO:0016514 | 0.002427 | 0.001737 | 0.001447 | 0.000817 |
| sodium:dicarboxylate symporter activity                                   | GO:GO:0017153 | 0.002427 | 0.000505 | 0.000569 | 0.000742 |
| nuclear lamina                                                            | GO:GO:0005652 | 0.002427 | 0.003289 | 0.001198 | 0.000367 |
| locomotory behavior                                                       | GO:GO:0007626 | 0.002427 | 0.000505 | 0.002003 | 0.003695 |
| poly(A) binding                                                           | GO:GO:0008143 | 0.002427 | 0.005043 | 0.001672 | 0.000349 |
| norepinephrine metabolism                                                 | GO:GO:0042415 | 0.002427 | 0.000505 | 6.5E-05  | 0        |
| nucleotide-excision repair                                                | GO:GO:0006289 | 0.002427 | 0.004201 | 0.002789 | 0.000804 |
| peptidyl-prolyl cis-trans isomerase activity                              | GO:GO:0003755 | 0.002427 | 0.007216 | 0.005948 | 0.002156 |
| positive regulation of cell migration                                     | GO:GO:0030335 | 0.002427 | 0.002685 | 0.001298 | 0.000733 |
| MAP kinase kinase kinase activity                                         | GO:GO:0004709 | 0.002427 | 0.000505 | 0.00086  | 0.00021  |
| fatty acid desaturation                                                   | GO:GO:0006636 | 0.002427 | 0.000505 | 0.000484 | 0.000249 |
| fatty acid elongation, unsaturated fatty acid                             | GO:GO:0019368 | 0.002427 | 0.000505 | 0.000382 | 0.000333 |
| mRNA splice site selection                                                | GO:GO:0006376 | 0.002427 | 0.006268 | 0.003658 | 0.001717 |
| protection from non-homologous end joining at telomere                    | GO:GO:0031848 | 0.002427 | 0        | 6.42E-05 | 0        |
| 35S primary transcript processing                                         | GO:GO:0006365 | 0.002427 | 0.003165 | 0.001304 | 0.001013 |
| positive regulation of epidermal growth factor receptor signaling pathway | GO:GO:0045742 | 0.002427 | 0.002057 | 0.000101 | 0        |
| auxiliary transport protein activity                                      | GO:GO:0015457 | 0.002427 | 0.000807 | 0.000383 | 0.000184 |
| oocyte maturation                                                         | GO:GO:0001556 | 0.002427 | 0.001737 | 0.000405 | 0.001359 |
| positive regulation of progression through cell cycle                     | GO:GO:0045787 | 0.002427 | 0.001737 | 0.000643 | 0.00024  |
| RNA helicase activity                                                     | GO:GO:0003724 | 0.002427 | 0.006613 | 0.003042 | 0.001028 |
| nucleocytoplasmic shuttling complex                                       | GO:GO:0031074 | 0.002427 | 0.002057 | 0.000101 | 0        |
| lamellipodium biogenesis                                                  | GO:GO:0030032 | 0.002427 | 0.000505 | 0.002541 | 0.002293 |
| ribonuclease MRP activity                                                 | GO:GO:0000171 | 0.002427 | 0.001435 | 0.000473 | 9.87E-05 |
| nuclear speck                                                             | GO:GO:0016607 | 0.002427 | 0.001108 | 0.001652 | 0.000412 |
| GTP biosynthesis                                                          | GO:GO:0006183 | 0.002427 | 0.001737 | 0.001328 | 0.001348 |
| nuclear telomeric heterochromatin                                         | GO:GO:0005724 | 0.002427 | 0        | 6.42E-05 | 0        |
| deaminase activity                                                        | GO:GO:0019239 | 0.002427 | 0.000505 | 0.000435 | 0.000411 |
| skeletal muscle growth                                                    | GO:GO:0048630 | 0.002427 | 0.000505 | 2.67E-05 | 0.00032  |
| histone ubiquitination                                                    | GO:GO:0016574 | 0.002427 | 0.000505 | 0.00066  | 6.41E-05 |

|                                                                                                |               |          |          |          |          |
|------------------------------------------------------------------------------------------------|---------------|----------|----------|----------|----------|
| nuclear envelope-endoplasmic reticulum network                                                 | GO:GO:0042175 | 0.002427 | 0.002057 | 0.001344 | 0.000934 |
| 1,3-beta-glucanosyltransferase activity                                                        | GO:GO:0042124 | 0.002427 | 0.003208 | 0.000959 | 0        |
| DNA-(apurinic or apyrimidinic site) lyase activity                                             | GO:GO:0003906 | 0.002427 | 0.002987 | 0.001014 | 0.000302 |
| 3'-5'-exoribonuclease activity                                                                 | GO:GO:0000175 | 0.002427 | 0.002685 | 0.00109  | 0        |
| sodium ion binding                                                                             | GO:GO:0031402 | 0.002427 | 0.006195 | 0.003458 | 0.005586 |
| phosphoglycerate dehydrogenase activity                                                        | GO:GO:0004617 | 0.002427 | 0        | 0.000367 | 0.0001   |
| diacylglycerol biosynthesis                                                                    | GO:GO:0006651 | 0.002427 | 0.000505 | 0.000189 | 0.000915 |
| nuclear envelope reassembly                                                                    | GO:GO:0031468 | 0.002427 | 0.002057 | 0.000498 | 0.000367 |
| response to stress                                                                             | GO:GO:0006950 | 0.002427 | 0.005469 | 0.00822  | 0.00943  |
| spindle stabilization                                                                          | GO:GO:0043146 | 0.002427 | 0.000505 | 6.42E-05 | 0        |
| protein import into mitochondrial matrix                                                       | GO:GO:0030150 | 0.002427 | 0.000807 | 0.000403 | 0        |
| oxidoreductase activity, acting on NADH or NADPH, NAD or NADP as acceptor                      | GO:GO:0016652 | 0.002427 | 0.001108 | 0.001098 | 0.00045  |
| negative regulation of coagulation                                                             | GO:GO:0050819 | 0.002427 | 0.000505 | 0.000755 | 0.000978 |
| nitric-oxide synthase regulator activity                                                       | GO:GO:0030235 | 0.002427 | 0.003811 | 0.001217 | 0.000431 |
| chaperonin-mediated tubulin folding                                                            | GO:GO:0007022 | 0.002427 | 0.00266  | 0.001221 | 0        |
| synaptic vesicle endocytosis                                                                   | GO:GO:0048488 | 0.002427 | 0.000807 | 0.001061 | 0.000781 |
| origin recognition complex                                                                     | GO:GO:0000808 | 0.002427 | 0.000505 | 0.000516 | 9.15E-05 |
| Rac guanyl-nucleotide exchange factor activity                                                 | GO:GO:0030676 | 0.002427 | 0.000505 | 6.42E-05 | 0.000294 |
| G-protein signaling, coupled to IP3 second messenger (phospholipase C activating)              | GO:GO:0007200 | 0.002427 | 0.000505 | 0.001654 | 0.001579 |
| transcription from mitochondrial promoter                                                      | GO:GO:0006390 | 0.002427 | 0.001755 | 0.000289 | 0.000303 |
| L-serine transporter activity                                                                  | GO:GO:0015194 | 0.002427 | 0.000505 | 0.00039  | 9.87E-05 |
| double-strand break repair                                                                     | GO:GO:0006302 | 0.002427 | 0.003899 | 0.00157  | 0.000551 |
| transcription factor TFIID complex                                                             | GO:GO:0005669 | 0.002427 | 0.002057 | 0.001013 | 0.000335 |
| sensory perception of smell                                                                    | GO:GO:0007608 | 0.002427 | 0.001755 | 0.001193 | 0.001404 |
| actin filament organization                                                                    | GO:GO:0007015 | 0.002427 | 0.003909 | 0.003943 | 0.007371 |
| potassium channel activity                                                                     | GO:GO:0005267 | 0.002427 | 0.004138 | 0.001923 | 0.005935 |
| embryonic cleavage                                                                             | GO:GO:0040016 | 0.002427 | 0.003289 | 0.000691 | 0.000647 |
| positive regulation of phosphoinositide 3-kinase activity                                      | GO:GO:0043552 | 0.002427 | 0.000807 | 0.000511 | 0.000556 |
| nuclear telomere cap complex                                                                   | GO:GO:0000783 | 0.002427 | 0        | 0.000128 | 0        |
| centrosome cycle                                                                               | GO:GO:0007098 | 0.002427 | 0.005444 | 0.001635 | 0.001107 |
| sensory perception                                                                             | GO:GO:0007600 | 0.002427 | 0.000505 | 0.002682 | 0.005916 |
| enzyme binding                                                                                 | GO:GO:0019899 | 0.002427 | 0.001737 | 0.002408 | 0.003179 |
| double-stranded telomeric DNA binding                                                          | GO:GO:0003691 | 0.002427 | 0.000505 | 6.42E-05 | 0        |
| axial mesoderm development                                                                     | GO:GO:0048318 | 0.002427 | 0.000505 | 6E-05    | 0        |
| hydrolase activity, acting on acid anhydrides, catalyzing transmembrane movement of substances | GO:GO:0016820 | 0.002427 | 0.000807 | 0.003121 | 0.003676 |
| actin nucleation                                                                               | GO:GO:0045010 | 0.002427 | 0.000505 | 0.000376 | 0.000971 |
| oogenesis (sensu Insecta)                                                                      | GO:GO:0009993 | 0.002427 | 0.004219 | 0.002556 | 0.001001 |
| neuromuscular synaptic transmission                                                            | GO:GO:0007274 | 0.002427 | 0.000807 | 0.000932 | 0.001175 |
| long-chain-fatty-acid-CoA ligase activity                                                      | GO:GO:0004467 | 0.002427 | 0.000505 | 0.000592 | 0.001382 |
| tRNA aminoacylation for protein translation                                                    | GO:GO:0006418 | 0.002427 | 0.006392 | 0.007193 | 0.002543 |
| spliceosome assembly                                                                           | GO:GO:0000245 | 0.002427 | 0.004759 | 0.002443 | 0.000437 |
| DNA topoisomerase (ATP-hydrolyzing) activity                                                   | GO:GO:0003918 | 0.002427 | 0.003289 | 0.001577 | 0.000323 |

|                                                                                           |               |          |          |          |          |
|-------------------------------------------------------------------------------------------|---------------|----------|----------|----------|----------|
| muscle thin filament tropomyosin                                                          | GO:GO:0005862 | 0.002427 | 0.000505 | 0.00055  | 0.000971 |
| taurine biosynthesis                                                                      | GO:GO:0042412 | 0.002427 | 0.000505 | 0.000277 | 0        |
| enoyl-[acyl-carrier protein] reductase activity                                           | GO:GO:0016631 | 0.002427 | 0        | 0.000128 | 5.66E-05 |
| phosphodiesterase I activity                                                              | GO:GO:0004528 | 0.002427 | 0.002057 | 0.000958 | 0.000629 |
| mitotic centrosome separation                                                             | GO:GO:0007100 | 0.002427 | 0.000807 | 0.000309 | 0.000267 |
| ribonucleoside monophosphate biosynthesis                                                 | GO:GO:0009156 | 0.002427 | 0.001755 | 0.000449 | 0.000148 |
| pyrimidine dimer repair via nucleotide-excision repair                                    | GO:GO:0000720 | 0.002427 | 0.000505 | 0.000119 | 0        |
| cyclin catabolism                                                                         | GO:GO:0008054 | 0.002427 | 0.00327  | 0.001483 | 0.000704 |
| general RNA polymerase II transcription factor activity                                   | GO:GO:0016251 | 0.002427 | 0.002358 | 0.0018   | 0.001544 |
| metanephros development                                                                   | GO:GO:0001656 | 0.002427 | 0.000505 | 0.001002 | 0.001413 |
| inner cell mass cell proliferation                                                        | GO:GO:0001833 | 0.002427 | 0.000302 | 0.00063  | 0.00058  |
| taurine metabolism                                                                        | GO:GO:0019530 | 0.002427 | 0.000505 | 0.000277 | 0        |
| lung development                                                                          | GO:GO:0030324 | 0.002427 | 0.00359  | 0.003925 | 0.003711 |
| growth cone                                                                               | GO:GO:0030426 | 0.002427 | 0.00141  | 0.002166 | 0.003378 |
| inositol or phosphatidylinositol phosphatase activity                                     | GO:GO:0004437 | 0.002427 | 0.003208 | 0.001404 | 0.002357 |
| polyamine metabolism                                                                      | GO:GO:0006595 | 0.002427 | 0.000807 | 0.000653 | 0.000512 |
| hematopoietin/interferon-class (D200-domain) cytokine receptor signal transducer activity | GO:GO:0005062 | 0.002427 | 0.000505 | 0.000121 | 0.000895 |
| NLS-bearing substrate import into nucleus                                                 | GO:GO:0006607 | 0.002427 | 0.006293 | 0.001409 | 0.000666 |
| monovalent inorganic cation transporter activity                                          | GO:GO:0015077 | 0.002427 | 0.000505 | 0.000683 | 0.000647 |
| asparagine synthase (glutamine-hydrolyzing) activity                                      | GO:GO:0004066 | 0.002427 | 0.000807 | 0.000102 | 0.000643 |
| viral envelope                                                                            | GO:GO:0019031 | 0.002427 | 0.000505 | 0.000267 | 0.000913 |
| traversing start control point of mitotic cell cycle                                      | GO:GO:0007089 | 0.002427 | 0.001435 | 0.000293 | 0.000121 |
| glutathione metabolism                                                                    | GO:GO:0006749 | 0.002427 | 0.000807 | 0.002131 | 0.003006 |
| negative regulation of blood coagulation                                                  | GO:GO:0030195 | 0.002427 | 0.000505 | 9.79E-05 | 0.000379 |
| galactoside binding                                                                       | GO:GO:0016936 | 0.002427 | 0.000505 | 4.08E-05 | 0        |
| protein binding, bridging                                                                 | GO:GO:0030674 | 0.002427 | 0.004822 | 0.003682 | 0.004399 |
| histone methylation                                                                       | GO:GO:0016571 | 0.002427 | 0.003608 | 0.001432 | 0.001685 |
| Rho GTPase activator activity                                                             | GO:GO:0005100 | 0.002427 | 0.000505 | 0.000346 | 0.000943 |
| structural constituent of chromatin                                                       | GO:GO:0030527 | 0.002427 | 0.004113 | 0.001294 | 0.000267 |
| negative regulation of non-apoptotic programmed cell death                                | GO:GO:0043072 | 0.002427 | 0.002057 | 0.000101 | 0        |
| cyclin-dependent protein kinase activity                                                  | GO:GO:0004693 | 0.002427 | 0.008455 | 0.002737 | 0.001771 |
| response to UV-C                                                                          | GO:GO:0010225 | 0.002427 | 0.000505 | 0.000119 | 0        |
| condensin complex                                                                         | GO:GO:0000796 | 0.002427 | 0.004113 | 0.000442 | 0.000118 |
| secretory pathway                                                                         | GO:GO:0045045 | 0.002427 | 0.00266  | 0.003623 | 0.003269 |
| mitochondrial DNA replication                                                             | GO:GO:0006264 | 0.002427 | 0.001755 | 0.000346 | 5.66E-05 |
| protein C (activated) activity                                                            | GO:GO:0003808 | 0.002427 | 0.000505 | 6.5E-05  | 0.000315 |
| ruffle                                                                                    | GO:GO:0001726 | 0.002427 | 0.001108 | 0.003563 | 0.003875 |
| RNA-3'-phosphate cyclase activity                                                         | GO:GO:0003963 | 0.002427 | 0.000505 | 0.000391 | 9.87E-05 |
| RNA metabolism                                                                            | GO:GO:0016070 | 0.002427 | 0.002057 | 0.001765 | 0.000856 |
| acyltransferase activity                                                                  | GO:GO:0008415 | 0.002427 | 0.00694  | 0.009046 | 0.009026 |
| bud neck                                                                                  | GO:GO:0005935 | 0.002427 | 0.000807 | 0.000278 | 0.000205 |
| cytokinesis by cell plate formation                                                       | GO:GO:0000911 | 0.002427 | 0.000505 | 0.000362 | 0.000521 |

|                                                                                                                                                               |               |          |          |          |          |
|---------------------------------------------------------------------------------------------------------------------------------------------------------------|---------------|----------|----------|----------|----------|
| regulation of progression through mitotic cell cycle                                                                                                          | GO:GO:0007346 | 0.002427 | 0.002969 | 0.001547 | 0.001522 |
| sphingosine metabolism                                                                                                                                        | GO:GO:0006670 | 0.002427 | 0.000505 | 0.000348 | 0.00061  |
| calcium-mediated signaling                                                                                                                                    | GO:GO:0019722 | 0.002427 | 0.002039 | 0.001304 | 0.002032 |
| negative regulation of phosphorylation                                                                                                                        | GO:GO:0042326 | 0.002427 | 0.000505 | 9.79E-05 | 0.00037  |
| kinetochore assembly                                                                                                                                          | GO:GO:0051382 | 0.002427 | 0.001435 | 3.29E-05 | 0.0001   |
| manganese ion transport                                                                                                                                       | GO:GO:0006828 | 0.002427 | 0.003208 | 0.000297 | 0.000364 |
| leucyl aminopeptidase activity                                                                                                                                | GO:GO:0004178 | 0.002427 | 0.000505 | 0.000416 | 0        |
| isocitrate dehydrogenase (NAD+) activity                                                                                                                      | GO:GO:0004449 | 0.002427 | 0.001108 | 0.001128 | 0.00045  |
| phosphotransferase activity, alcohol group as acceptor                                                                                                        | GO:GO:0016773 | 0.002427 | 0.002057 | 0.002416 | 0.002208 |
| morphogenesis                                                                                                                                                 | GO:GO:0009653 | 0.002427 | 0.002039 | 0.003461 | 0.003587 |
| regulation of circadian sleep/wake cycle, sleep                                                                                                               | GO:GO:0045187 | 0.002427 | 0.000505 | 0.000526 | 0.001095 |
| oxidoreductase activity, acting on paired donors, with oxidation of a pair of donors resulting in the reduction of molecular oxygen to two molecules of water | GO:GO:0016717 | 0.002427 | 0.000505 | 0.00117  | 0.000676 |
| glutamate 5-kinase activity                                                                                                                                   | GO:GO:0004349 | 0.002427 | 0.000505 | 3.29E-05 | 0        |
| thymidine kinase activity                                                                                                                                     | GO:GO:0004797 | 0.002427 | 0.001737 | 0.000461 | 0.000339 |
| malic enzyme activity                                                                                                                                         | GO:GO:0004470 | 0.002427 | 0        | 0.000321 | 0.000326 |
| 5'-flap endonuclease activity                                                                                                                                 | GO:GO:0017108 | 0.002427 | 0.002667 | 0.000259 | 0.000205 |
| positive regulation of nitric oxide biosynthesis                                                                                                              | GO:GO:0045429 | 0.002427 | 0.000505 | 8.57E-05 | 0.000916 |
| rRNA modification                                                                                                                                             | GO:GO:0000154 | 0.002427 | 0.002987 | 0.000736 | 0.00043  |
| transferase activity, transferring pentosyl groups                                                                                                            | GO:GO:0016763 | 0.002427 | 0.002358 | 0.000723 | 0.000175 |
| alpha DNA polymerase activity                                                                                                                                 | GO:GO:0003889 | 0.002427 | 0.000807 | 0.000101 | 0.000149 |
| regulation of protein secretion                                                                                                                               | GO:GO:0050708 | 0.002427 | 0.000505 | 0.000343 | 0.00063  |
| mitochondrial nucleoid                                                                                                                                        | GO:GO:0042645 | 0.002427 | 0.000807 | 0.000394 | 0.000118 |
| regulation of osteoblast differentiation                                                                                                                      | GO:GO:0045667 | 0.002427 | 0.002057 | 0.000346 | 0.000684 |
| cell cycle arrest                                                                                                                                             | GO:GO:0007050 | 0.002427 | 0.008012 | 0.006012 | 0.007003 |
| synaptonemal complex                                                                                                                                          | GO:GO:0000795 | 0.002427 | 0.003208 | 0.000734 | 0        |
| mating projection tip                                                                                                                                         | GO:GO:0043332 | 0.002427 | 0.000807 | 0.00064  | 0.000779 |
| WW domain binding                                                                                                                                             | GO:GO:0050699 | 0.002427 | 0.000807 | 0.000675 | 9.87E-05 |
| inositol trisphosphate 3-kinase activity                                                                                                                      | GO:GO:0008440 | 0.002427 | 0.000505 | 0.000237 | 0.000484 |
| embryonic development                                                                                                                                         | GO:GO:0009790 | 0.002427 | 0.002013 | 0.004893 | 0.003076 |
| response to ethylene stimulus                                                                                                                                 | GO:GO:0009723 | 0.002427 | 0.001737 | 0.000233 | 0.000155 |
| L-serine transport                                                                                                                                            | GO:GO:0015825 | 0.002427 | 0.000505 | 0.00039  | 9.87E-05 |
| inositol or phosphatidylinositol kinase activity                                                                                                              | GO:GO:0004428 | 0.002427 | 0.000505 | 0.000658 | 0.0009   |
| mRNA binding                                                                                                                                                  | GO:GO:0003729 | 0.002427 | 0.009735 | 0.010122 | 0.003485 |
| tight junction                                                                                                                                                | GO:GO:0005923 | 0.002427 | 0.000807 | 0.004289 | 0.006816 |
| adenosylmethionine decarboxylase activity                                                                                                                     | GO:GO:0004014 | 0.002427 | 0.000505 | 0.000385 | 9.15E-05 |
| water channel activity                                                                                                                                        | GO:GO:0015250 | 0.002427 | 0.003005 | 0.000368 | 0.000962 |
| cell plate                                                                                                                                                    | GO:GO:0009504 | 0.002427 | 0.000807 | 0.000255 | 0.000247 |
| voltage-gated ion channel activity                                                                                                                            | GO:GO:0005244 | 0.002427 | 0.005061 | 0.003746 | 0.007314 |
| microtubule depolymerization                                                                                                                                  | GO:GO:0007019 | 0.002427 | 0.002057 | 0.000315 | 0.000371 |
| DNA ligase activity                                                                                                                                           | GO:GO:0003909 | 0.002427 | 0.000807 | 0.000283 | 0.000118 |
| response to amphetamine                                                                                                                                       | GO:GO:0001975 | 0.002427 | 0.000505 | 0.000373 | 0.000781 |
| digestion                                                                                                                                                     | GO:GO:0007586 | 0.002427 | 0.000505 | 0.000922 | 0.003812 |

|                                                                                                                                           |               |          |          |          |          |
|-------------------------------------------------------------------------------------------------------------------------------------------|---------------|----------|----------|----------|----------|
| neuromuscular junction                                                                                                                    | GO:GO:0031594 | 0.002427 | 0.000505 | 0.000412 | 0.000538 |
| tyrosine phosphorylation of STAT protein                                                                                                  | GO:GO:0007260 | 0.002427 | 0.000807 | 0.000943 | 0.00075  |
| phenylethanolamine N-methyltransferase activity                                                                                           | GO:GO:0004603 | 0.002427 | 0.000505 | 0        | 0.000348 |
| peroxisome                                                                                                                                | GO:GO:0005777 | 0.002427 | 0.000807 | 0.007214 | 0.009609 |
| aminoacyl-tRNA ligase activity                                                                                                            | GO:GO:0004812 | 0.002427 | 0.007322 | 0.008588 | 0.0026   |
| positive regulation of vasodilation                                                                                                       | GO:GO:0045909 | 0.002427 | 0.000505 | 6.75E-05 | 0.000822 |
| regulation of neurotransmitter secretion                                                                                                  | GO:GO:0046928 | 0.002427 | 0.000505 | 0.000256 | 0.001017 |
| response to heat                                                                                                                          | GO:GO:0009408 | 0.002427 | 0.002013 | 0.005353 | 0.003849 |
| voltage-gated potassium channel activity                                                                                                  | GO:GO:0005249 | 0.002427 | 0.006841 | 0.002012 | 0.004674 |
| hormone-mediated signaling                                                                                                                | GO:GO:0009755 | 0.002427 | 0.002057 | 0.000464 | 0        |
| insulin receptor signaling pathway                                                                                                        | GO:GO:0008286 | 0.002427 | 0.001108 | 0.003185 | 0.00173  |
| elevation of cytosolic calcium ion concentration during G-protein signaling, coupled to IP3 second messenger (phospholipase C activating) | GO:GO:0051482 | 0.002427 | 0.000505 | 0.000477 | 0.000278 |
| intracellular transport                                                                                                                   | GO:GO:0046907 | 0.002427 | 0.003811 | 0.003815 | 0.003987 |
| vacuolar protein catabolism                                                                                                               | GO:GO:0007039 | 0.002427 | 0.000807 | 0.000419 | 0.000323 |
| male pronucleus                                                                                                                           | GO:GO:0001940 | 0.002427 | 0        | 0.000188 | 0.000118 |
| fatty acid synthase complex                                                                                                               | GO:GO:0005835 | 0.002427 | 0        | 0.000128 | 5.66E-05 |
| nitric oxide biosynthesis                                                                                                                 | GO:GO:0006809 | 0.002427 | 0.004113 | 0.00127  | 0.001891 |
| negative regulation of insulin receptor signaling pathway                                                                                 | GO:GO:0046627 | 0.002427 | 0.000505 | 0.000904 | 0.001555 |
| troponin C binding                                                                                                                        | GO:GO:0030172 | 0.002427 | 0.002057 | 0.000202 | 0.000267 |
| CTP synthase activity                                                                                                                     | GO:GO:0003883 | 0.002427 | 0.001755 | 0.000531 | 0.000248 |
| lymphocyte differentiation                                                                                                                | GO:GO:0030098 | 0.002427 | 0.002057 | 0.001367 | 0.000596 |
| hydrogen:potassium-exchanging ATPase activity                                                                                             | GO:GO:0008900 | 0.002427 | 0.000505 | 0.000135 | 0.0001   |
| microvillus                                                                                                                               | GO:GO:0005902 | 0.002427 | 0.00266  | 0.001829 | 0.003408 |
| protein secretion                                                                                                                         | GO:GO:0009306 | 0.002427 | 0.001108 | 0.001169 | 0.001517 |
| oligodendrocyte differentiation                                                                                                           | GO:GO:0048709 | 0.002427 | 0.000807 | 0.000955 | 0.000323 |
| double-stranded RNA binding                                                                                                               | GO:GO:0003725 | 0.002427 | 0.002039 | 0.002816 | 0.002465 |
| glyoxylate cycle                                                                                                                          | GO:GO:0006097 | 0.002427 | 0.001108 | 0.000972 | 0.000175 |
| tubulin                                                                                                                                   | GO:GO:0045298 | 0.002427 | 0.002358 | 0.000848 | 0.000983 |
| IMP dehydrogenase activity                                                                                                                | GO:GO:0003938 | 0.002427 | 0.002987 | 0.000446 | 0.00029  |
| guard cell differentiation                                                                                                                | GO:GO:0010052 | 0.002427 | 0.000505 | 0.000362 | 0.000521 |
| S-adenosylhomocysteine metabolism                                                                                                         | GO:GO:0046498 | 0.002427 | 0.002366 | 0.000869 | 0.000903 |
| synaptic transmission, dopaminergic                                                                                                       | GO:GO:0001963 | 0.002427 | 0.000505 | 0.000287 | 0.000592 |
| tubulin folding                                                                                                                           | GO:GO:0007021 | 0.002427 | 0.002962 | 0.002721 | 0.000816 |
| ribonuclease MRP complex                                                                                                                  | GO:GO:0000172 | 0.002427 | 0.001435 | 0.000473 | 9.87E-05 |
| growth factor binding                                                                                                                     | GO:GO:0019838 | 0.002427 | 0.001108 | 0.002354 | 0.002256 |
| ubiquitin protein ligase binding                                                                                                          | GO:GO:0031625 | 0.002427 | 0.000807 | 0.000519 | 0.000361 |
| COPII vesicle coat                                                                                                                        | GO:GO:0030127 | 0.002427 | 0.000505 | 0.000992 | 0.000448 |
| CTP biosynthesis                                                                                                                          | GO:GO:0006241 | 0.002427 | 0.001737 | 0.001167 | 0.000832 |
| gluconeogenesis                                                                                                                           | GO:GO:0006094 | 0.002427 | 0.001755 | 0.003011 | 0.004673 |
| very-long-chain fatty acid biosynthesis                                                                                                   | GO:GO:0042761 | 0.002427 | 0.000505 | 0.000446 | 0.000333 |
| DNA (cytosine-5-)-methyltransferase activity                                                                                              | GO:GO:0003886 | 0.002427 | 0.002987 | 0.000496 | 0.000275 |
| epinephrine biosynthesis                                                                                                                  | GO:GO:0042418 | 0.002427 | 0.000505 | 0        | 0.000348 |
| tryptophan catabolism to kynurenine                                                                                                       | GO:GO:0019441 | 0.002427 | 0.000505 | 6.42E-05 | 0.000392 |
| ribosomal protein import into nucleus                                                                                                     | GO:GO:0006610 | 0.002427 | 0.002057 | 0.001382 | 0        |

|                                                             |               |          |          |          |          |
|-------------------------------------------------------------|---------------|----------|----------|----------|----------|
| G1/S-specific transcription in mitotic cell cycle           | GO:GO:0000083 | 0.002427 | 0.000505 | 0.000487 | 0.000175 |
| SRP-dependent cotranslational protein targeting to membrane | GO:GO:0006614 | 0.002427 | 0.002057 | 0.000939 | 0.000982 |
| positive regulation of cytokine secretion                   | GO:GO:0050715 | 0.002427 | 0.000505 | 0.000124 | 0.000621 |
| cell organization and biogenesis                            | GO:GO:0016043 | 0.002427 | 0.000505 | 0.000303 | 0.000699 |
| negative regulation of protein catabolism                   | GO:GO:0042177 | 0.002427 | 0.000505 | 0.000341 | 0.000387 |
| G1-specific transcription in mitotic cell cycle             | GO:GO:0000114 | 0.002427 | 0.002057 | 0.000823 | 0.000897 |
| anti-inflammatory response                                  | GO:GO:0030236 | 0.002427 | 0.000505 | 0.000474 | 0.000692 |
| methylenetetrahydrofolate dehydrogenase (NAD+) activity     | GO:GO:0004487 | 0.002427 | 0.000807 | 0.000292 | 0.000367 |
| phosphoserine transaminase activity                         | GO:GO:0004648 | 0.002427 | 0.000505 | 0.000263 | 5.66E-05 |
| isocitrate metabolism                                       | GO:GO:0006102 | 0.002427 | 0.001108 | 0.000807 | 0.000118 |
| calcineurin complex                                         | GO:GO:0005955 | 0.002427 | 0.001737 | 0.000656 | 0.000518 |
| regulation of signal transduction                           | GO:GO:0009966 | 0.002427 | 0.003492 | 0.001301 | 0.001137 |
| two-component signal transduction system (phosphorelay)     | GO:GO:0000160 | 0.002427 | 0.002039 | 0.00392  | 0.003162 |
| carbohydrate phosphorylation                                | GO:GO:0046835 | 0.002427 | 0.000505 | 0.000628 | 0.000337 |
| complement activation                                       | GO:GO:0006956 | 0.002427 | 0.000505 | 0.000884 | 0.002261 |
| protein kinase C activation                                 | GO:GO:0007205 | 0.002427 | 0.002039 | 0.001211 | 0.000937 |
| eye morphogenesis (sensu Vertebrata)                        | GO:GO:0048593 | 0.002427 | 0.000807 | 0.000696 | 0.000249 |
| base-excision repair, gap-filling                           | GO:GO:0006287 | 0.002427 | 0.003608 | 0.001082 | 0.000149 |
| fertilization (sensu Metazoa)                               | GO:GO:0007338 | 0.002427 | 0.000505 | 0.001071 | 0.000458 |
| zinc ion transport                                          | GO:GO:0006829 | 0.002427 | 0.001435 | 0.001529 | 0.001757 |
| response to UV-B                                            | GO:GO:0010224 | 0.002427 | 0.000505 | 0.000247 | 0.000175 |
| N-acetyltransferase activity                                | GO:GO:0008080 | 0.002427 | 0.003509 | 0.002296 | 0.001823 |
| asparagine biosynthesis                                     | GO:GO:0006529 | 0.002427 | 0.000807 | 0.000102 | 0.000643 |
| RNA destabilization                                         | GO:GO:0050779 | 0.002427 | 0.000505 | 0.000343 | 0.000594 |
| positive regulation of cell motility                        | GO:GO:0051272 | 0.002427 | 0.003289 | 0.001229 | 0.000697 |
| carboxypeptidase C activity                                 | GO:GO:0004186 | 0.002427 | 0.000807 | 0.000415 | 0.000759 |
| epsilon DNA polymerase activity                             | GO:GO:0003893 | 0.002427 | 0.002667 | 0.000457 | 0.000149 |
| meiotic joint molecule formation                            | GO:GO:0000709 | 0.002427 | 0.001435 | 9.19E-05 | 0.000249 |
| protein complex assembly                                    | GO:GO:0006461 | 0.002427 | 0.004397 | 0.006612 | 0.006694 |
| acetylglucosaminyltransferase activity                      | GO:GO:0008375 | 0.002427 | 0.000505 | 0.001431 | 0.001685 |
| sensory perception of sound                                 | GO:GO:0007605 | 0.002427 | 0.001108 | 0.00367  | 0.003545 |
| cell-substrate junction assembly                            | GO:GO:0007044 | 0.002427 | 0.001435 | 0.000758 | 0.001438 |
| protein catabolism                                          | GO:GO:0030163 | 0.002427 | 0.002962 | 0.004158 | 0.002197 |
| protein-glutamine gamma-glutamyltransferase activity        | GO:GO:0003810 | 0.002427 | 0.000505 | 0.000477 | 0.000359 |
| phosphoribosylformylglycinamide cyclo-ligase activity       | GO:GO:0004641 | 0.002427 | 0.000807 | 0.000239 | 0        |
| visual perception                                           | GO:GO:0007601 | 0.002427 | 0.002642 | 0.004815 | 0.006792 |
| water transport                                             | GO:GO:0006833 | 0.002427 | 0.003005 | 0.000402 | 0.000962 |
| peptidyl-serine phosphorylation                             | GO:GO:0018105 | 0.002427 | 0.001755 | 0.000826 | 0.00065  |
| regulation of protein import into nucleus                   | GO:GO:0042306 | 0.002427 | 0.000505 | 0.000711 | 0.000451 |
| DNA topoisomerase complex (ATP-hydrolyzing)                 | GO:GO:0009330 | 0.002427 | 0.002987 | 0.000472 | 0.000323 |
| hemostasis                                                  | GO:GO:0007599 | 0.002427 | 0.000505 | 0.000616 | 0.001329 |
| chromatin remodeling complex                                | GO:GO:0016585 | 0.002427 | 0.002358 | 0.000769 | 9.15E-05 |
| regulation of cell redox homeostasis                        | GO:GO:0030503 | 0.002427 | 0.002057 | 0.001593 | 0.001286 |
| rRNA methyltransferase activity                             | GO:GO:0008649 | 0.002427 | 0.001755 | 0.000474 | 0.000246 |

|                                                                                |               |          |          |          |          |
|--------------------------------------------------------------------------------|---------------|----------|----------|----------|----------|
| positive regulation of abscisic acid mediated signaling                        | GO:GO:0009789 | 0.002427 | 0.001737 | 0.000233 | 9.87E-05 |
| double-stranded DNA specific exodeoxyribonuclease activity                     | GO:GO:0008309 | 0.002427 | 0.001737 | 0.000193 | 0.000149 |
| isocitrate dehydrogenase (NADP+) activity                                      | GO:GO:0004450 | 0.002427 | 0.001108 | 0.001055 | 0.000569 |
| establishment of mitotic spindle localization                                  | GO:GO:0040001 | 0.002427 | 0.001737 | 0.000335 | 0.000267 |
| inner kinetochore of condensed chromosome                                      | GO:GO:0000939 | 0.002427 | 0.001737 | 0.000364 | 0.0001   |
| positive regulation of long-term neuronal synaptic plasticity                  | GO:GO:0048170 | 0.002427 | 0.004138 | 0        | 9.87E-05 |
| vacuole                                                                        | GO:GO:0005773 | 0.002427 | 0.000505 | 0.001852 | 0.002519 |
| endocytosis                                                                    | GO:GO:0006897 | 0.002427 | 0.000505 | 0.008729 | 0.012264 |
| GDP binding                                                                    | GO:GO:0019003 | 0.002427 | 0.000505 | 0.000132 | 0.000488 |
| purine base biosynthesis                                                       | GO:GO:0009113 | 0.002427 | 0.000807 | 0.000329 | 0        |
| lymphocyte proliferation                                                       | GO:GO:0046651 | 0.002427 | 0.002987 | 0.000605 | 0.000382 |
| integrin complex                                                               | GO:GO:0008305 | 0.002427 | 0.000807 | 0.002115 | 0.00317  |
| tRNA splicing                                                                  | GO:GO:0006388 | 0.002427 | 0.000807 | 0.000408 | 0.000118 |
| transcription initiation from mitochondrial promoter                           | GO:GO:0006391 | 0.002427 | 0.001755 | 0.000151 | 5.66E-05 |
| phosphoribosylglycinamide formyltransferase activity                           | GO:GO:0004644 | 0.002427 | 0.000807 | 0.000239 | 0        |
| superoxide metabolism                                                          | GO:GO:0006801 | 0.002427 | 0.000505 | 0.002162 | 0.001967 |
| double-strand break repair via synthesis-dependent strand annealing            | GO:GO:0045003 | 0.002427 | 0.001435 | 0.000152 | 0.00033  |
| negative regulation of protein kinase activity                                 | GO:GO:0006469 | 0.002427 | 0.000807 | 0.002139 | 0.003935 |
| activation of NF-kappaB transcription factor                                   | GO:GO:0051092 | 0.002427 | 0.002057 | 0.002033 | 0.001833 |
| alpha-glucan biosynthesis                                                      | GO:GO:0030979 | 0.002427 | 0.000505 | 0.00019  | 0        |
| alpha-1,6-mannosylglycoprotein 2-beta-N-acetylglucosaminyltransferase activity | GO:GO:0008455 | 0.002427 | 0.000505 | 0.00024  | 0.000155 |
| Rho GTPase binding                                                             | GO:GO:0017048 | 0.002427 | 0.000807 | 0.000961 | 0.001177 |
| sphingolipid biosynthesis                                                      | GO:GO:0030148 | 0.002427 | 0.001737 | 0.000351 | 0.00061  |
| negative regulation of microtubule polymerization                              | GO:GO:0031115 | 0.002427 | 0.002057 | 0.000225 | 0        |
| DNA ligase (ATP) activity                                                      | GO:GO:0003910 | 0.002427 | 0.000807 | 0.000556 | 0.000118 |
| mRNA editing                                                                   | GO:GO:0006381 | 0.002427 | 0.003608 | 0.00107  | 0.001325 |
| smoothened signaling pathway                                                   | GO:GO:0007224 | 0.002427 | 0.000505 | 0.001555 | 0.001534 |
| histone binding                                                                | GO:GO:0042393 | 0.002427 | 0.001108 | 0.001357 | 0.000599 |
| adenosine metabolism                                                           | GO:GO:0046085 | 0.002427 | 0.000505 | 0.00033  | 5.66E-05 |
| mitotic metaphase/anaphase transition                                          | GO:GO:0007091 | 0.002427 | 0.002642 | 0.001747 | 0.001954 |
| pentose-phosphate shunt                                                        | GO:GO:0006098 | 0.002427 | 0.000807 | 0.002513 | 0.002341 |
| DNA primase activity                                                           | GO:GO:0003896 | 0.002427 | 0.003005 | 0.000942 | 0.000445 |
| uracil DNA N-glycosylase activity                                              | GO:GO:0004844 | 0.002427 | 0.000603 | 0.000457 | 0.000442 |
| negative regulation of angiogenesis                                            | GO:GO:0016525 | 0.002427 | 0.001435 | 0.002032 | 0.001556 |
| regulation of Cdc42 GTPase activity                                            | GO:GO:0043088 | 0.002427 | 0.000505 | 0.000362 | 0.000521 |
| branching morphogenesis of a tube                                              | GO:GO:0048754 | 0.002427 | 0.002358 | 0.001966 | 0.001226 |
| negative regulation of mitotic metaphase/anaphase transition                   | GO:GO:0045841 | 0.002427 | 0.001737 | 0.000358 | 0.000267 |
| mitotic G2 checkpoint                                                          | GO:GO:0007095 | 0.002427 | 0.000807 | 0.00026  | 0.000358 |
| actin filament binding                                                         | GO:GO:0051015 | 0.002427 | 0.006903 | 0.003325 | 0.007249 |
| glucose transport                                                              | GO:GO:0015758 | 0.002427 | 0.003811 | 0.001256 | 0.003192 |

|                                                                           |               |          |          |          |          |
|---------------------------------------------------------------------------|---------------|----------|----------|----------|----------|
| negative regulation of actin filament polymerization                      | GO:GO:0030837 | 0.002427 | 0.000505 | 6.5E-05  | 0.000315 |
| dolichyl-phosphate-mannose-protein mannosyltransferase activity           | GO:GO:0004169 | 0.002427 | 0.000505 | 8.32E-05 | 0        |
| mammary gland development                                                 | GO:GO:0030879 | 0.002427 | 0.001435 | 0.000893 | 0.000747 |
| calcium-dependent protein serine/threonine phosphatase regulator activity | GO:GO:0008597 | 0.002427 | 0.001737 | 0.000233 | 9.87E-05 |
| cysteine protease inhibitor activity                                      | GO:GO:0004869 | 0.002427 | 0.002039 | 0.002492 | 0.003287 |
| sex determination                                                         | GO:GO:0007530 | 0.002427 | 0.002039 | 0.00031  | 0.000118 |
| snRNP protein import into nucleus                                         | GO:GO:0006608 | 0.002427 | 0.001755 | 0.000328 | 0        |
